# Supplementary material for: Elucidation of the molecular responses to waterlogging in Jatropha roots by transcriptome profiling
Source: Front Plant Sci. 2014 Dec 2;5:658. doi: 10.3389/fpls.2014.00658 (PMC4251292; doi:10.3389/fpls.2014.00658)
Supplement: Supplementary Table S2 — A list of Jatropha AP2/ERF transcription factors. [file Table2.XLSX]

## Sheet: AP2_ERFs
One hundred and thirty three AP2/ERF genes in Jatropha genome
Order	Family Name	Group	Gene ID	Gene Name	Scaffold (JAT4.5)	Gene start	Gene end	# Exon	# Intron	id	Protein sequence	CDS
1	ERF	I	Jcr4S00096.180	JcERFI-1	Jcr4S00096	68420	69362	2	1	Jcr4S00096.180	MTMERLHENIVPFGFTNAADIRSSLSQLILAGGSNTIDSIFSHCPAATTTIDSPVFEPLGSSVYLRQRDLLQKFCEENKKSTNSSFSRSFLTNPIQSSVGASNYSSPNKKKLYRGVRQRHWGKWVAEIRLPQNRMRVWLGTYDTAEAAAYAYDLDAKIQAICQKVKRERAKKSAAKKNNVDANISDGVKAVKLDSNSSSPSSSSISPNLVFNDNWYGELVSPTVSDDGFLMCENSASSVSTECPVMAPEDMEFEGCSLARLPSFDPELIWEVLAN	ATGACCATGGAAAGACTGCATGAAAACATCGTTCCTTTTGGATTCACCAATGCTGCGGATATTAGGTCCTCTCTATCGCAACTCATACTAGCAGGAGGCAGCAACACAATAGATTCAATTTTCTCTCATTGCCCTGCAGCAACAACAACCATTGATAGCCCTGTTTTTGAGCCTTTAGGCTCTTCAGTCTATCTCCGCCAAAGAGATCTCTTGCAAAAATTTTGCGAAGAAAACAAAAAGAGCACTAATTCTTCATTTTCTCGCAGTTTTCTAACGAATCCAATTCAAAGTTCTGTTGGTGCAAGCAATTATTCATCTCCAAACAAGAAGAAATTATACAGGGGAGTGAGACAGAGACATTGGGGAAAATGGGTGGCTGAAATTAGACTCCCTCAAAAC…
2	ERF	I	Jcr4S00098.220	JcERFI-2	Jcr4S00098	75819	77174	1	0	Jcr4S00098.220	MAAAKNNTGKSKKGIVDERQDWELDKGKANFSFNERQQWKPVFGEVSIADRPLKKIRSPERQDPIQFSTSSSSSSSSAYNTTPPFTVSTCSASASSSVSSFSSSASSRLLFPFAFEGCNNQPIQFPHQFKTNPSFPYYRPTIQNQQQMISFNQSQQQSITNPLFFAGESALAHHHQQQQQLFQYWSDTLNLSPRGRMMMMNRAGPDGRPLFRPPIQPINTTKLYRGVRQRHWGKWVAEIRLPRNRTRLWLGTFDTAEDAALAYDREAFKLRGENARLNFPELFLNKNKETSITPSTSTISSPPETPHQTSSPKQESMLPPPPPPPPQMLTPPPPRPQDTPDNDSGMDSSGATMSDEVQAAAEMSGCSGGEGGSQELVWGDMAEAWFNAIPAGWGPGSPV…	ATGGCTGCAGCTAAGAATAATACAGGAAAATCCAAGAAGGGTATTGTTGATGAAAGACAAGATTGGGAGCTTGACAAGGGCAAAGCTAATTTTAGCTTTAATGAGAGGCAACAATGGAAGCCAGTTTTTGGTGAAGTTTCCATAGCAGATAGGCCTCTCAAAAAAATCCGTAGCCCCGAACGTCAAGACCCAATTCAATTCTCTACATCATCATCATCTTCTTCTTCTTCTGCTTATAACACTACCCCTCCTTTCACTGTTTCTACTTGTTCTGCCTCTGCTTCTTCCTCTGTTTCGTCTTTCTCATCTTCTGCATCTTCAAGACTTTTGTTTCCTTTTGCATTTGAAGGATGTAATAATCAACCTATCCAATTTCCTCACCAATTTAAAACAAACCCT…
3	ERF	I	Jcr4S01198.20	JcERFI-3	Jcr4S01198	7416	8546	1	0	Jcr4S01198.20	MATTMDFYSSRHVQSDLFGGELMEALEPFMKSATSSTIPSPSATPSISSSSLPPLPSTSYNYLSFSPSPSSSPLVSFPQQNLSFLYSDGCSTSTALPFSNGFSIHDPNRLQQPTSSIGLNHLTPTQIHQIQTQIHYQNQNGFNFQNFHTQNQHGLNFLGPKPVPMKQVGSPPKPTKLYRGVRQRHWGKWVAEIRLPKNRTRLWLGTFDTAEEAALAYDKAAYKLRGDFARLNFPNLRHQGSHIEGSFGEYKPLHSSVDAKLQAICQSLAESQKQGGKAEKQSNSSAKKKTSVGTTPATAEKVKEAKAPQQVVPDKCCKVETPSSVLTESEASGGSSPLSDLTFPDLEEAPLDVDSGNFNLEKYPSYEIDWASLLSS	ATGGCAACTACAATGGATTTCTACAGTAGTAGACATGTTCAGTCTGACCTCTTTGGAGGTGAGCTAATGGAAGCACTTGAACCTTTTATGAAAAGTGCTACTTCTTCAACTATACCTTCTCCCTCTGCAACACCTTCTATTTCTTCTTCTTCTTTGCCTCCTCTTCCTTCTACATCTTATAATTATCTTTCTTTCTCTCCTTCTCCTTCTTCCTCTCCTTTAGTTTCTTTTCCTCAACAGAACCTATCCTTTTTGTACTCAGATGGTTGCTCCACATCGACTGCCCTTCCATTTTCAAATGGGTTCTCGATCCATGACCCCAACCGTCTTCAGCAACCTACTAGTTCAATCGGGCTTAATCATCTTACTCCAACCCAGATCCACCAGATCCAGACCCAA…
4	ERF	I	Jcr4S02295.20	JcERFI-4	Jcr4S02295	6152	7230	2	1	Jcr4S02295.20	MAAAIDIYNSKTAPVFSVMDPCREELMKALEPFMKSASPTSPSSSFSLSPPPFPSCSYHSPICSSQPNFQPEACSPSSTHVFSQGFSGYNQMGFEQTGSIGLNHLTPSQILQIQAQIHFQQQQQQIPNLSSNSHLLHNQRLSYLAPKPVSMKQSASPSKPTKLYRGVRQRHWGKWVAEIRLPKNRTRLWLGTFDTAEEAALAYDKAAYKLRGEFARLNFPHLRHQGDFGDYKPLHASVDAKLQAISPMKAIKEEDYSLKGELKREIENLGAEDYRVEISSAAASSDESLAGSSSPQSEISFLDFSDSSQWDETENFGLEKYPSVEIDWAAL	ATGGCAGCAGCTATAGATATCTATAATAGCAAAACAGCACCAGTTTTCTCTGTTATGGATCCCTGTAGAGAAGAATTAATGAAAGCGCTTGAACCTTTTATGAAAAGTGCTTCACCAACTTCTCCTTCTTCTTCTTTTTCTCTTTCTCCTCCTCCTTTCCCATCTTGTTCTTATCACTCTCCGATTTGTTCTTCACAGCCCAATTTTCAGCCTGAAGCTTGCTCCCCATCTAGTACCCACGTGTTTTCTCAAGGGTTTTCTGGTTATAACCAAATGGGTTTTGAGCAAACAGGTTCAATAGGGCTTAATCATCTTACCCCATCTCAGATTCTCCAAATCCAAGCCCAAATTCACTTCCAACAACAACAACAGCAAATTCCTAATCTTTCTTCAAATTCA…
5	ERF	I	Jcr4S04974.10	JcERFI-5	Jcr4S04974	947	2020	3	2	Jcr4S04974.10	MEDQFTRRDTFMCKEFPGYSFHEGSKYFDDQVIWTRTNDINNGSMKSSITSSDSSSSVEEAEASGFNSINMNQRSSIDPTQPMKYTGRRLQNQQQKPSLSSPAGKLFRGVRQRHWGKWVAEIRLPRNRTRVWLGTFETAEEAAMAYDTAAYMLRGDYAHLNFPDLKHQLQANSLNGSTISALLEAKLQAISQGNNNISGQKKHILDPSPPTTSSNKDFGEKPTKKI	ATGGAAGATCAGTTTACAAGAAGGGACACTTTCATGTGCAAGGAATTTCCTGGTTATAGTTTTCATGAAGGATCAAAATATTTTGATGATCAAGTCATTTGGACAAGAACTAATGACATTAACAACGGCAGCATGAAATCATCAATCACGAGTTCTGATTCGAGTTCATCGGTGGAGGAGGCGGAGGCTTCAGGATTCAATTCTATCAATATGAATCAAAGATCTTCAATTGATCCTACGCAACCGATGAAATACACTGGCCGGAGATTGCAGAATCAGCAGCAAAAGCCTAGTTTATCTTCGCCGGCCGGGAAGTTATTTAGAGGAGTTAGACAAAGGCATTGGGGCAAATGGGTTGCAGAAATTAGGTTACCAAGAAACAGAACTAGGGTTTGGTTA…
6	ERF	II	Jcr4S00148.20	JcERFII-1	Jcr4S00148	5926	6447	1	0	Jcr4S00148.20	MSGSRTTTTAETAKYKGVRRRKWGKWVSEIRVPGTQGRLWLGSYSSPEAAAVAHDIASYCLRGHSSIDSLNFPDLMLPASVRGDISPTSIQKAASDAGMAVDAQMIMNRVGSSDNEVNGNEGSGNGAVLGSETEQLEWGDVGGDGGRGNWSGSGSQSGDSGDSLNISVEDYYF	ATGAGCGGTTCAAGAACTACTACGACAGCTGAAACAGCAAAATACAAAGGAGTTCGCCGGAGAAAGTGGGGGAAATGGGTGTCGGAGATAAGAGTTCCCGGAACACAAGGGCGGCTCTGGTTAGGTTCTTATTCTTCCCCGGAGGCAGCTGCGGTGGCTCATGATATAGCTTCTTATTGTTTAAGAGGACACTCGTCCATCGACAGTTTAAATTTTCCTGATTTAATGTTGCCCGCGAGTGTAAGAGGGGACATATCCCCTACGTCTATACAGAAAGCAGCTTCAGATGCTGGCATGGCGGTTGATGCGCAGATGATAATGAACAGAGTTGGGTCTTCTGATAATGAAGTCAATGGAAATGAAGGTAGTGGAAATGGTGCAGTTCTTGGTTCGGAGACA…
7	ERF	II	Jcr4S00811.120	JcERFII-2	Jcr4S00811	79064	79696	1	0	Jcr4S00811.120	MLKPATSSASSPEQISSDRNEPKYKGVRKRKWGKWVSEIRLPNSRERIWLGSYDTPEKAARAFDAALYCLRGRGAKFNFPDNPPDNIDGGQSLSPQEIQAVASRYANENPNPNATTTRMSRTGESSSQAMDQYASSSEDNAIDWSFLNSLGSNEGVSKFELYSVLDNMGNEYFPPPPPPPFDDGEDHNTGNDDHNGDEDYSQQSFLWNFN	ATGTTGAAACCAGCAACATCGTCAGCGTCATCACCCGAGCAAATTTCTTCTGACAGAAATGAGCCGAAATACAAAGGTGTAAGAAAGCGAAAGTGGGGGAAATGGGTGTCGGAAATCCGGTTGCCGAACAGTCGGGAAAGAATCTGGTTAGGATCTTACGACACACCGGAAAAGGCAGCGCGAGCATTTGATGCAGCTTTGTATTGTCTACGTGGCCGAGGTGCAAAATTCAATTTTCCAGATAATCCCCCGGATAATATTGACGGTGGACAGTCACTGAGTCCACAAGAAATCCAAGCGGTAGCGTCTAGGTATGCAAATGAGAACCCGAACCCAAATGCAACCACAACTAGGATGAGTCGCACAGGAGAATCATCATCGCAAGCAATGGATCAGTAC…
8	ERF	II	Jcr4S00891.50	JcERFII-3	Jcr4S00891	19553	20074	1	0	Jcr4S00891.50	MSGSRTTTTAETAKYKGVRRRKWGKWVSEIRVPGTQRRLWLGSYSSPEAAAVAHDIASYCLRGHSSIDSLNFPDLMLPASVRGDMSPTSIQKAASDAGMAVDAQMIMNRVGSSDNEVNGNEGSGNGAVLGSETEQLEWGDVGGDGGRGNWSGSGSQSGDSGDSLNISVEDYYF	ATGAGCGGTTCAAGAACTACTACGACAGCTGAAACAGCTAAATACAAAGGAGTTCGCCGGAGAAAGTGGGGGAAATGGGTTTCGGAGATAAGAGTTCCCGGAACACAAAGGCGGCTCTGGTTAGGTTCTTATTCTTCCCCGGAGGCAGCTGCGGTGGCTCATGATATAGCTTCTTATTGTTTAAGAGGACACTCGTCCATCGACAGCTTAAATTTTCCCGATTTAATGTTGCCCGCGAGTGTAAGAGGGGACATGTCCCCTACGTCTATACAGAAAGCAGCTTCAGATGCTGGTATGGCGGTTGATGCGCAGATGATAATGAACAGAGTTGGGTCTTCTGATAATGAAGTCAATGGAAATGAAGGTAGTGGAAATGGTGCAGTTCTTGGTTCGGAGACA…
9	ERF	II	Jcr4S01288.20	JcERFII-4	Jcr4S01288	9332	9808	1	0	Jcr4S01288.20	MEAGECCSSTSPSTSTPTSAEKRKHRQQQEKPYRGIRMRKWGKWVAEIREPNKRSRIWLGSYSTPIAAARAYDTAVFYLRGPSARLNFPDLIFRDDEQTRDMSAASIRKKATEVGAQVDALQQTAPHSHASDQNSNRVVVSEKPDLNQYPNPENSDEE	ATGGAAGCAGGCGAGTGTTGTTCCAGTACTTCTCCCTCTACTTCTACTCCCACAAGTGCCGAGAAACGCAAGCACAGGCAACAACAAGAAAAGCCTTACAGAGGTATAAGGATGAGGAAGTGGGGAAAGTGGGTCGCTGAAATTAGAGAACCCAACAAACGTTCTAGAATTTGGCTTGGCTCTTATTCTACCCCTATCGCCGCCGCGCGTGCATATGACACCGCCGTTTTCTACCTTAGAGGCCCTTCCGCTAGACTTAATTTCCCCGATTTGATATTCCGCGATGACGAACAGACAAGAGACATGTCTGCTGCTTCTATACGCAAAAAAGCAACCGAAGTTGGGGCTCAGGTGGACGCCCTGCAACAAACGGCTCCCCACAGCCATGCATCGGATCAG…
10	ERF	II	Jcr4S02314.30	JcERFII-5	Jcr4S02314	23709	24305	1	0	Jcr4S02314.30	MVKHTTDKPADRSDSKYKGVRKRKWGKWVSEIRLPNSRERIWLGSYDSAEKAARAFDAALFCLRGRTAKFNFPDNPPEIAGGRSLSPPEIQAAAARFANSYPSRKQLENSSTDQSVTELQAESPCPSVVSDLTAQIDGSELMMDIPFLDLLANTDYGIFPGFDDLHNDFFSPLTGPGPDLVEENLDGVVAQDSFLWNF	ATGGTGAAACACACAACCGATAAGCCTGCCGACAGAAGTGATTCTAAGTACAAAGGTGTCCGCAAGCGAAAATGGGGGAAATGGGTTTCTGAAATCCGTTTACCAAACAGTAGAGAGCGAATCTGGTTAGGATCATACGATTCAGCAGAGAAAGCGGCGCGTGCTTTCGACGCTGCACTCTTTTGCTTACGTGGCCGAACTGCCAAATTCAATTTCCCCGATAACCCACCTGAAATAGCCGGCGGAAGGTCCCTTTCCCCACCCGAAATTCAAGCGGCGGCTGCTAGGTTTGCGAATTCGTATCCTTCGAGAAAACAATTGGAGAATTCTTCAACGGATCAATCTGTAACGGAATTGCAAGCGGAGTCTCCTTGTCCTTCAGTAGTGTCGGATTTGACT…
11	ERF	II	Jcr4S02314.40	JcERFII-6	Jcr4S02314	26250	26642	1	0	Jcr4S02314.40	MVRPSEGGRGEKYKGVRMRKWGKWVAEIRQPNSRGRIWLGSYNTAEEAARAYDAALFCLRGPSAILNFPMNPPDIPSATDLSPSQIRDVAFRHARKGPEMTASEEASGLLKESSELRGETYFFGLPRSVE	ATGGTGAGGCCGAGCGAGGGTGGTAGAGGAGAAAAATATAAGGGAGTGAGGATGAGAAAATGGGGGAAATGGGTGGCGGAGATACGGCAACCGAATAGCAGAGGTAGGATTTGGCTAGGGTCTTATAACACTGCAGAGGAAGCAGCTAGAGCCTATGATGCTGCGCTTTTTTGCTTACGTGGACCTTCTGCGATTCTCAATTTCCCAATGAATCCACCGGATATTCCTTCAGCAACTGATCTCTCGCCGTCTCAGATTCGGGATGTTGCGTTTAGGCATGCACGAAAGGGCCCGGAGATGACGGCATCGGAAGAGGCGTCTGGGTTGTTGAAGGAGTCGTCAGAATTGCGTGGAGAGACTTATTTTTTTGGCCTGCCACGCAGCGTAGAGTAG
12	ERF	II	Jcr4S08408.10	JcERFII-7	Jcr4S08408	2616	3197	1	0	Jcr4S08408.10	MENGVEKAMAARKRGGGGGGGGGVEGERTYKGIRMRKWGKWVAEIREPNKRSRIWLGSYSTPVAAARAYDTAVFYLRGPSARLNFPEYLAGENIGGSCGDMSAASIRKKATEVGARVDAALNHHHNHHHSHHHHSHHHEHHRSSSSSSNSTNNNSSSNHKSVVDSSEFKSFVERVDLNKMPDPEDSDADWERN	ATGGAAAATGGAGTGGAAAAGGCGATGGCCGCGAGGAAGCGAGGCGGAGGAGGAGGAGGCGGCGGAGGAGTGGAAGGAGAGAGGACGTACAAAGGGATAAGGATGAGGAAGTGGGGGAAATGGGTGGCTGAGATAAGAGAACCTAATAAGCGGTCAAGGATTTGGCTCGGCTCCTATTCGACTCCTGTGGCGGCGGCTAGGGCCTATGACACTGCGGTTTTCTATTTGAGAGGACCGTCGGCGAGGCTTAATTTTCCTGAATATTTGGCGGGAGAAAATATCGGCGGAAGTTGCGGAGACATGTCGGCCGCCTCAATAAGGAAAAAAGCGACCGAGGTTGGAGCTAGAGTCGACGCTGCTTTAAATCACCACCACAATCACCACCATAGCCATCACCAC…
13	ERF	II	Jcr4S22068.10	JcERFII-8	Jcr4S22068	113	666	1	0	Jcr4S22068.10 /partial	SLPCSHFCKKRSGSRPTTTAETAKYKGVRRRKWGKWVSEIRVPGTQGRLWLGSYSSPEAAAVAHDIASYCLRGHSSIDSLNFPDLMLPASVRGDISPTSIQKAASDAGMAVDAQMIMNRVGSSDNEVNGNEGSGNGAVLGSETEQLEWGDVGGDGGRGNWSGSGSQSGDSGDSLNISVEDYYF	AAAGTCTTCCTTGTTCACACTTTTGCAAGAAAAGGAGCGGTTCAAGACCTACTACGACAGCTGAAACAGCTAAATACAAAGGAGTTCGCCGGAGAAAGTGGGGGAAATGGGTTTCGGAGATAAGAGTTCCCGGAACACAAGGGCGGCTCTGGTTAGGTTCTTATTCTTCCCCGGAGGCAGCTGCGGTGGCTCATGATATAGCTTCTTATTGTTTAAGAGGACACTCGTCCATCGACAGTTTAAATTTTCCTGATTTAATGTTGCCCGCGAGTGTAAGAGGGGACATATCCCCTACGTCTATACAGAAAGCAGCTTCAGATGCTGGCATGGCGGTTGATGCGCAGATGATAATGAACAGAGTTGGGTCTTCTGATAATGAAGTCAATGGAAATGAAGGTA…
14	ERF	II	Jcr4U31212.10	JcERFII-9	Jcr4U31212	1182	1739	1	0	Jcr4U31212.10	MAARKRGGGGGGGGGVEGERTYKGIRMRKWGKWVAEIREPNKRSRIWLGSYSTPVAAARAYDTAVFYLRGPSARLNFPEYLAGENIGGSCGDMSAASIRKKATEVGARVDAALNHHHNHHHSHHHHSHHHEHHRSSSSSSNSTNNNSSSNHKSVVDSSEFKSFVERVDLNKMPDPEDSDADWERN	ATGGCCGCGAGGAAGCGAGGCGGAGGAGGAGGAGGCGGCGGAGGAGTGGAAGGAGAGAGGACGTACAAAGGGATAAGGATGAGGAAGTGGGGGAAATGGGTGGCTGAGATAAGAGAACCTAATAAGCGGTCAAGGATTTGGCTCGGCTCCTATTCGACTCCTGTGGCGGCGGCTAGGGCCTATGACACTGCGGTTTTCTATTTGAGAGGACCGTCGGCGAGGCTTAATTTTCCTGAATATTTGGCGGGAGAAAATATCGGCGGAAGTTGCGGAGACATGTCGGCCGCCTCAATAAGGAAAAAAGCGACCGAGGTTGGAGCTAGAGTCGACGCTGCTTTAAATCACCACCACAATCACCACCATAGCCATCACCACCATAGCCACCACCACGAGCACCAT…
15	ERF	III	Jcr4S00034.80	JcERFIII-1	Jcr4S00034	49225	49971	1	0	Jcr4S00034.80	MPDTIRENSNWETESSINSSFPAPCSPSSSGLSTKPVRKSDSDENDQRKPKRARDSSKHPVYRGVRMRTWGKWVSEIREPRKKNRIWLGTFSTPEMAARAHDVAALTIKGNSAILNFPELAGSLPRPASNSPRDVQAAAAKAASMDFHISKDTQHDNNINNASSSSTVTQSSSSSTAEVTSSPCDVATPEELSQIVELPSLEMSFEKSPELRDEFVFGDPWLYNPPWYEDYMSESVINSGFELLLWED	ATGCCTGACACGATTCGAGAAAACTCGAATTGGGAGACCGAGTCCAGTATTAACTCTTCTTTTCCAGCTCCTTGTTCGCCATCTTCATCCGGGTTATCTACAAAACCGGTTCGGAAATCCGACTCGGATGAGAATGATCAGAGAAAACCCAAGAGGGCTAGAGACAGTAGCAAGCATCCGGTGTATAGAGGAGTGAGAATGCGCACTTGGGGCAAATGGGTATCGGAGATACGAGAGCCCCGGAAGAAGAACCGGATCTGGCTCGGCACTTTTTCCACACCCGAAATGGCGGCACGTGCACACGACGTGGCTGCTTTAACCATTAAAGGCAACTCGGCAATCCTTAACTTCCCTGAACTCGCTGGGTCGCTGCCTCGACCCGCCTCTAACTCGCCTCGC…
16	ERF	III	Jcr4S00458.180	JcERFIII-2	Jcr4S00458	107903	108454	1	0	Jcr4S00458.180	MRSWGKWVLEIREPRKKSRIWLGTFPTAEMAARAHDVAAMSIKGNAAILNFPEIVDSLPRPVSLMPRDIQAAAAKAASMVEFNSLSSSSSSSSLLSESSSSSSSSSVSVSDDVSESEELSEIVELPNIEGSFDSAESVTEFILFDSVDGWVYPPPQDMCGEFSDQLMGLESLISSNFGASVWD	ATGCGAAGTTGGGGTAAATGGGTATTAGAAATCCGTGAACCGAGAAAGAAATCACGTATTTGGCTTGGGACATTCCCCACGGCGGAAATGGCGGCCCGTGCTCATGATGTCGCCGCTATGAGTATTAAAGGTAATGCTGCCATTCTTAATTTTCCAGAAATCGTTGACTCACTGCCTCGGCCAGTTTCATTAATGCCGCGAGATATTCAAGCAGCCGCCGCCAAAGCTGCTTCAATGGTTGAATTCAACTCATTATCATCGTCATCTTCTTCGTCTTCGCTGCTGTCGGAATCGTCATCATCATCGTCGTCGTCTTCGGTGTCTGTGTCCGATGATGTTTCAGAATCTGAAGAATTGAGTGAAATTGTCGAGTTGCCGAATATAGAAGGGAGTTTTGAC…
17	ERF	III	Jcr4S00534.100	JcERFIII-3	Jcr4S00534	53727	54326	1	0	Jcr4S00534.100	MRNWGKWVSEIREPRKKSRIWLGTFPTPEMAARAHDVAALSIKGNSAILNFPELANSLPRPASLAPRDVQAAAAKAAQMDQFDQKAFDSATTTTTSSSSPSMSSASASSLSSLVSAMDLSTGSEEELSEIVELPSLGTSYEWTELSSDFVFVDSVDGWVYPPPWVQSLEDSYGDGCLFDEMTVTNTISNSFEQGLLWEY	ATGCGGAACTGGGGTAAATGGGTGTCAGAAATTCGCGAGCCGCGCAAGAAATCGCGCATTTGGCTTGGTACTTTCCCTACTCCTGAAATGGCAGCTCGAGCACATGATGTTGCAGCTTTAAGCATCAAAGGTAACTCGGCAATTCTTAACTTTCCTGAACTCGCTAACTCACTTCCCCGACCTGCTTCACTTGCTCCACGTGACGTCCAAGCCGCTGCAGCTAAAGCAGCACAAATGGACCAATTTGACCAAAAAGCGTTTGACTCAGCAACAACAACAACAACTTCATCATCATCTCCGTCAATGTCTTCGGCCTCTGCTTCTTCATTATCATCTCTTGTATCGGCGATGGACTTGTCGACAGGGTCAGAGGAAGAGTTGAGTGAGATCGTGGAGTTA…
18	ERF	III	Jcr4S00783.10	JcERFIII-4	Jcr4S00783	740	1447	1	0	Jcr4S00783.10	MECEAQPTASSSSSSSSTSSFPSDPMNNSNKMNSPKSSKRDQEVVNKSNNERNNKKAKAENAKIYPNYRGVRMRQWGKWVSEIRXXXXXXXXXXXXXXXXXXXXXXXXSTIKGHSAHLNFPELAHKLPRPASSSPKDIQAAAALAAALNYQNDNEVADLIISSQLGEPEPQWPDITEASHDTQESEDDTFIDLPDLLQDISHQFNEFCYLSSWQQQLGVAENLDTGLWYHQESFF	ATGGAGTGTGAGGCTCAACCAACCGCATCTTCTTCTTCTTCTTCTTCTTCAACCTCTTCTTTCCCTTCTGATCCGATGAATAACTCCAACAAAATGAATTCCCCAAAGAGCTCTAAGAGAGATCAAGAAGTAGTAAACAAAAGCAACAATGAAAGAAACAACAAGAAAGCGAAGGCAGAAAATGCAAAAATTTATCCAAATTATCGAGGAGTAAGAATGCGTCAATGGGGGAAATGGGTATCCGAAATCCGANNNNNNNNNNNNNNNNNNNNNNNNNNNNNNNNNNNNNNNNNNNNNNNNNNNNNNNNNNNNNNNNNNNNNNNNTCAACAATAAAAGGCCATTCAGCTCATCTAAATTTCCCAGAGTTAGCTCACAAGCTTCCTCGTCCTGCAAGTTCT…
19	ERF	III	Jcr4S00845.160	JcERFIII-5	Jcr4S00845	61067	61810	1	0	Jcr4S00845.160	MDKHINLEIDAPENSLTSSSSSSSSPSSSSSSSSSSASNKGSRKAYFQELENGNESKKKQKMSTSSADHNETNRNNNKHPKYRGVRMRSWGKWVSEIREPRKKSRIWLGTYPTAEMAARAHDVAALAIKGNSAYLNFPELVHELPRPVTKSPKDIQAAAAKAALSETTQFQLQAEAHQLISSNTNTTSAMDNSNTQESDDTLFDLPDLFIDGVDLKSNGFCQYSPSWHLCTADTGFRVEEPYIWEYY	ATGGATAAACATATCAACCTTGAAATTGATGCTCCAGAAAATTCCCTTACCTCCTCCTCCTCCTCTTCTTCTTCTCCTTCTTCATCTTCTTCTTCTTCCTCCTCCTCAGCTTCTAATAAAGGCTCAAGAAAGGCTTACTTTCAAGAACTGGAAAATGGCAATGAGAGTAAGAAAAAGCAAAAGATGTCTACTTCTAGTGCTGATCATAATGAAACTAATCGCAATAACAATAAGCATCCAAAATATAGAGGCGTAAGAATGCGAAGTTGGGGGAAATGGGTATCTGAAATTAGAGAGCCAAGAAAGAAATCAAGAATATGGCTTGGTACTTACCCTACTGCAGAAATGGCTGCTCGAGCTCACGATGTAGCTGCTTTAGCCATCAAAGGTAATTCTGCT…
20	ERF	III	Jcr4S00968.20	JcERFIII-6	Jcr4S00968	7715	8275	1	0	Jcr4S00968.20	MQEQTSSQSGTPSIYRGVRKRKWGKWVSEIREPGKKTRIWLGSFETPEMAAAAYDVAALHFRGREAKLNFPELVNELPKPISSNGDDIRMAAHEAAIRLRPPEREGGSGGSSGGSNSNSGGSSSTNVVGPVTVRLSQSQIQAINESPLDSPKMWMQMAMAEEAMMFCNDFEDDEWDNMQNDSLWDP	ATGCAAGAGCAAACCAGTAGCCAAAGCGGTACCCCATCTATCTATAGAGGGGTACGTAAGCGAAAATGGGGGAAATGGGTATCGGAGATCCGTGAGCCAGGGAAAAAAACCAGAATATGGTTAGGGAGTTTCGAAACGCCAGAAATGGCAGCAGCAGCTTATGATGTAGCGGCTTTGCATTTCAGAGGACGTGAAGCTAAGCTTAATTTTCCTGAGTTGGTTAATGAGCTTCCAAAGCCTATAAGCTCTAATGGAGATGATATTCGCATGGCGGCCCATGAGGCTGCTATTCGTCTTAGGCCGCCTGAGCGAGAGGGTGGCAGTGGCGGTAGTAGTGGTGGTAGTAATAGTAATAGTGGCGGCTCTAGCTCGACCAATGTTGTCGGTCCGGTGACAGTT…
21	ERF	III	Jcr4S02119.10	JcERFIII-7	Jcr4S02119	3606	4193	1	0	Jcr4S02119.10	MEQPPFTEDDPATTTTTTTTATSPQDRINRNSDASRCSGGTRHPVYRGVRKRRWGKWVSEIREPRKKSRIWLGSFPVPEMAAKAYDVAAYCLKGCKAQLNFPEELEDLPRPSSCTARDIQAAAAKAANSMKKSNIANSDGDGDSNGDRENDDFWGEIELPELMNSGLNWSSCAWSFAGDCTWMDGEAPQQFMACL	ATGGAGCAACCACCATTTACTGAAGATGACCCGGCCACAACCACCACCACCACCACCACTGCCACCTCTCCACAGGACAGAATCAACCGTAATTCTGATGCTTCTCGATGCAGCGGCGGAACAAGACATCCAGTCTACCGTGGAGTCAGGAAACGGAGGTGGGGCAAATGGGTGTCGGAAATTCGCGAACCCCGTAAAAAATCACGAATTTGGCTAGGCTCATTTCCTGTACCGGAAATGGCTGCCAAGGCTTATGACGTGGCTGCTTATTGTCTTAAAGGTTGCAAAGCACAGCTTAATTTTCCAGAAGAGTTAGAGGACTTGCCTAGGCCATCCTCGTGCACGGCTAGAGATATTCAAGCAGCAGCAGCTAAAGCAGCAAATTCAATGAAAAAGAGC…
22	ERF	III	Jcr4S02476.10	JcERFIII-8	Jcr4S02476	4653	5345	1	0	Jcr4S02476.10	MSCQSSDNNTQESSSSLSDSCSSTTNKTREAHSDEEVLLATSLPKRKAGRRVFKETRHPVYRGVRKRNGNKWVCELREPNKKTRIWLGTYPTPEMAARAHDVAALAFRGKSACLNFADSAWRLPVPASRDAKEIRRAASQAAEMFRREESDDVQITRRDDSFVDSTDSECKNYEENLWFVEEDTIFDMPRLLVDMAQGLLLSPPRFEGEFSNDHWNPLDSSDSDMSLWSY	ATGAGTTGCCAATCATCTGATAACAATACGCAAGAATCGTCATCTTCTCTATCTGATTCTTGCAGTAGTACTACTAATAAAACTAGAGAAGCTCACTCAGATGAAGAAGTGTTGTTAGCTACTAGTCTTCCAAAAAGGAAAGCTGGAAGAAGAGTATTCAAAGAGACTCGCCATCCAGTTTACAGAGGTGTAAGGAAGAGAAATGGGAATAAATGGGTTTGTGAGTTAAGAGAACCGAACAAGAAAACAAGAATATGGCTTGGGACTTACCCTACACCAGAAATGGCAGCTAGGGCACATGATGTTGCTGCATTGGCTTTTAGAGGCAAGTCTGCTTGTCTTAACTTTGCTGATTCAGCTTGGAGATTGCCTGTGCCAGCTTCCAGAGACGCAAAGGAG…
23	ERF	III	Jcr4S02476.20	JcERFIII-9	Jcr4S02476	6336	7019	1	0	Jcr4S02476.20	MSSQFSDPYPVLEKQDSDTSTGTASLQRSAHSDEEVLLATSYPKKRAGRRIFKETRHPIFRGVRKRNNEKWVCELREPNKKTRIWLGTYPTPEMAARAHDVAALALRGKSACLNFADSSWRLPVPVSKEAQDIRRAAHEAAEMFRSGETEKCGVEYSGEVSSRNSELKQENDVSYIDEEAVFDMPGLLANMAEGPLLSPPHYAGGDDGVNWDELEADGEVSLWSFSI	ATGAGCAGTCAATTTTCTGATCCTTATCCAGTATTAGAAAAGCAAGACTCCGATACTAGCACCGGCACCGCGAGCCTCCAACGCTCTGCTCACTCCGACGAAGAAGTACTGCTAGCTACAAGCTACCCGAAGAAGCGAGCAGGGCGGCGAATATTTAAGGAAACACGACATCCCATTTTTCGTGGAGTTCGAAAAAGAAACAATGAAAAATGGGTTTGTGAGCTTAGAGAACCCAATAAGAAGACACGTATATGGCTCGGTACATATCCAACACCAGAAATGGCGGCCAGAGCACATGACGTGGCTGCATTAGCGCTTAGAGGAAAATCGGCTTGTCTTAACTTTGCAGATTCTTCTTGGAGGTTGCCGGTGCCTGTTTCTAAGGAGGCGCAGGATATT…
24	ERF	III	Jcr4S02476.30	JcERFIII-10	Jcr4S02476	13026	13661	1	0	Jcr4S02476.30	MADPNIHNHTGLPQINQTHPPFDPTSPPKPNPLDPFVSWSNSTNPGQNPPKSSMATTSATTKRHPIYRGIRSRSGKWVSEIREPRKTTRIWLGTYQTPEMAAAAYDVAALALKGGDAVLNFPNSVGSYPVPASSSPTDIRNAAAAAAAFKNAEMNQRPLILQARSDHELSANFTASDQEFVDEEALFRYAQFAGGYGRRNAAFAAQNNLLR	ATGGCTGACCCTAATATCCACAACCACACTGGTCTGCCTCAAATAAACCAAACTCACCCACCTTTTGACCCTACTTCTCCTCCTAAACCTAACCCACTTGACCCATTTGTTTCCTGGTCTAACTCTACAAACCCAGGTCAAAACCCACCTAAGTCGTCTATGGCTACCACTTCTGCTACTACTAAACGACACCCGATATATCGGGGAATTCGTAGCCGGAGCGGAAAATGGGTGTCTGAAATCCGGGAGCCACGCAAAACCACCCGTATTTGGCTTGGTACCTACCAAACACCAGAAATGGCTGCCGCGGCCTATGATGTGGCTGCGCTAGCCCTAAAAGGTGGAGATGCAGTACTGAATTTCCCTAATTCTGTTGGGTCTTATCCTGTCCCCGCTTCA…
25	ERF	III	Jcr4S02872.10	JcERFIII-11	Jcr4S02872	2564	3214	1	0	Jcr4S02872.10	MASPNADSPPQPYQPDQVLDPIAAPEQQSPRSTSSNPSPRPIRSPSGFPSTGRHPTYRGIRSRSGKWVSEIREPRKTTRIWLGTYSTPEMAAAAYDVAALSLKGPDAALNFPESILSYPIPASMSASDIRAAAATAAMARQPKPESGSNPSTGPLEXXGISYVESGQKFIDEEEILNMPNLLVDMAEGMLLSPPRINTPSSDDSAGNSDEGLWSYQ	ATGGCCAGTCCTAATGCTGATTCGCCGCCCCAACCATACCAGCCGGATCAAGTCCTTGACCCTATTGCGGCGCCAGAACAACAATCACCACGCTCCACGTCATCCAACCCTTCACCAAGACCCATTCGATCTCCATCGGGTTTTCCCTCCACTGGAAGGCATCCGACTTATCGGGGAATTCGGAGTCGGAGTGGAAAATGGGTATCCGAGATCCGGGAGCCACGTAAAACTACTCGTATATGGTTGGGTACGTACTCTACTCCTGAAATGGCAGCCGCCGCTTACGACGTCGCTGCTTTATCCCTTAAAGGTCCCGACGCAGCCCTCAACTTTCCTGAATCTATTTTATCTTATCCAATACCAGCTTCGATGTCAGCCAGCGATATACGGGCCGCTGCT…
26	ERF	III	Jcr4S02872.20	JcERFIII-12	Jcr4S02872	9495	10172	1	0	Jcr4S02872.20	MDFLSCYSDPLPFGGFDSPVSDSCSAPARTNFSDEELMLASSYPKKRAGRKKFRETRHPVYRGVRRRNSGKWVCEVREPNKKSRIWLGTFPTAEMAARAHDVAALALRGRSACLNFADSSWRLPVPASSDPKDIQKAAAEAARAFRPVEADGLLGDEFRQENKRATETAEAEGMFYMDEEAVFGMPGLLANMAEGMLLPPPQCVAENGDDIEADSADVPLWSFSI	ATGGATTTTCTCTCTTGCTACTCCGACCCACTTCCTTTTGGCGGCTTCGATTCTCCAGTGTCGGATAGTTGCAGTGCTCCAGCTCGTACAAATTTTTCCGATGAAGAATTGATGTTAGCTTCCAGCTATCCAAAGAAACGGGCTGGCAGAAAGAAATTCCGGGAGACTCGCCATCCCGTTTACCGAGGAGTTCGTAGGAGAAACTCCGGGAAGTGGGTTTGTGAAGTTAGAGAACCTAATAAGAAATCAAGAATATGGTTAGGAACTTTTCCCACGGCGGAAATGGCAGCACGGGCTCACGACGTGGCGGCGCTGGCACTTAGAGGTAGGTCTGCGTGTTTGAATTTTGCAGACTCGTCATGGCGGTTGCCAGTACCAGCTTCGAGTGATCCAAAGGAC…
27	ERF	III	Jcr4S02890.10	JcERFIII-13	Jcr4S02890	3054	3644	1	0	Jcr4S02890.10	MEDIYTTTVDSGRTGLPPSRYRGIRQRKWGKWVSEIREPGKKTRIWLGSYELPEMAAAAYDVAALHFRGSGAHLNFPELVDSLPRPASSSAEDVQMAAQEAAMRFGNNIRATKCSEVGGCGGSGGGSGGVGDGLGPVRIGLSPSQIQAINETPLDSPKMWMELAGALLLAESTAWENVDFDFNELEEIEDTSIWNY	ATGGAAGATATCTATACCACCACCGTCGACAGTGGCCGCACCGGCCTTCCTCCTTCAAGATATCGCGGCATCCGCCAACGGAAATGGGGGAAATGGGTGTCTGAAATCCGGGAACCAGGTAAGAAAACGCGTATTTGGTTAGGGAGTTATGAATTACCGGAGATGGCAGCCGCAGCTTATGATGTGGCAGCATTGCATTTCCGAGGAAGTGGAGCTCACTTGAACTTTCCGGAATTAGTGGATAGTTTACCTAGGCCAGCGAGCTCTAGTGCGGAGGATGTGCAAATGGCAGCGCAAGAAGCGGCTATGAGGTTTGGGAATAATATAAGGGCGACAAAATGTTCGGAGGTTGGTGGCTGCGGCGGCTCTGGTGGAGGTAGTGGTGGCGTTGGCGATGGT…
28	ERF	III	Jcr4S03392.10	JcERFIII-14	Jcr4S03392	1999	2589	1	0	Jcr4S03392.10	MEDIYTTTVDSGRTGLPPSRYRGIRQRKWGKWVSEIREPGKKTRIWLGSYELPEMAAAAYDVAALHFRGSGAHLNFPELVDSLPRPASSSAEDVQMAAQEAAMRFGNNIRATKCSEVGGCGGSGGGSGGVGDGLGPVRIGLSPSQIQAINETPLDSPKMWMELAGALLLAESTAWENVDFDFNELEEIEDTSIWNY	ATGGAAGATATCTATACCACCACCGTCGACAGTGGCCGCACCGGCCTTCCTCCTTCAAGATATCGCGGCATCCGCCAACGGAAATGGGGGAAATGGGTGTCTGAAATCCGGGAACCAGGTAAGAAAACGCGTATTTGGTTAGGGAGTTATGAATTACCGGAGATGGCAGCCGCAGCTTATGATGTGGCAGCATTGCATTTCCGAGGAAGTGGAGCTCACTTGAACTTTCCGGAATTAGTGGATAGTTTACCTAGGCCAGCGAGCTCTAGTGCGGAGGATGTGCAAATGGCAGCGCAAGAAGCGGCTATGAGGTTTGGGAATAATATAAGGGCGACAAAATGTTCGGAGGTTGGTGGCTGCGGCGGCTCTGGTGGAGGTAGTGGTGGCGTTGGCGATGGT…
29	ERF	III	Jcr4S06401.10	JcERFIII-15	Jcr4S06401	2169	2810	1	0	Jcr4S06401.10	MHYSQQQSSNSTGSENNAASASAARPAGRHPVYRGVRRRSSGKWVSEIREPRKPNRIWLGTFPTPEMAAIAYDVAALALKGRDTELNFPNSAPSLPVPASTSPRDIQAAAASAASALGAARDALGIGNNQLEITNNNYNYNINQTVLGQESSIMTDHQFVDEDLIFDMPNLLVNMAEGMLLSPPRLDFSASADATDDDHQNPSVGEQNLWKFP	ATGCATTACTCGCAACAACAGTCCAGCAACTCTACCGGCAGCGAAAACAACGCCGCCTCTGCTTCTGCTGCTCGACCCGCAGGGCGTCACCCAGTTTATAGAGGCGTTAGGCGTAGGAGTAGTGGAAAATGGGTGTCTGAAATTAGAGAGCCTAGAAAGCCTAATAGGATTTGGTTAGGCACATTTCCTACGCCGGAAATGGCTGCTATAGCTTATGATGTAGCTGCTTTGGCGCTTAAAGGTAGAGATACTGAGCTTAATTTCCCTAACTCAGCACCATCTCTGCCTGTACCAGCATCTACATCCCCGCGTGATATTCAGGCGGCTGCTGCCTCTGCAGCTTCTGCTCTAGGGGCTGCAAGAGACGCTTTGGGAATTGGAAACAATCAACTGGAGATC…
30	ERF	III	Jcr4S10647.30	JcERFIII-16	Jcr4S10647	11138	11800	1	0	Jcr4S10647.30	MEFDNGSIPISSICRFPPEVVMKKRKAGRTKFKETRHPFYRGVRRRNGNKWVCEVREPNKNKSRIWLGTFPTPEMAARAHDIAALALRGDLAILNFPDSASVLPRPKSSSAKDIKRVVRAFVSTTPSVSPSSSSCSYMSTTSQPYLVDHRSNDEFESCYNETREVSESNALFMDEEALFNMPVLLDSLAEGLILTPPGIQSGIHWNEMAFDDMELTLWEP	ATGGAGTTTGATAATGGTTCTATCCCAATTTCTTCGATCTGCCGATTTCCTCCTGAAGTTGTCATGAAAAAGAGGAAGGCAGGAAGGACTAAGTTTAAGGAAACCAGACACCCATTTTATAGAGGTGTTCGACGAAGAAATGGAAATAAATGGGTATGTGAAGTGCGAGAACCAAATAAGAACAAGTCAAGGATTTGGTTAGGTACGTTTCCTACTCCAGAAATGGCAGCTAGGGCACACGACATTGCTGCTCTGGCATTAAGAGGAGATCTTGCTATACTAAACTTCCCTGATTCTGCTTCGGTACTTCCAAGACCGAAGTCTTCTTCTGCAAAAGATATTAAAAGGGTCGTTCGAGCTTTTGTATCAACTACTCCTTCAGTATCACCATCATCATCT…
31	ERF	III	Jcr4S12236.10	JcERFIII-17	Jcr4S12236	3407	4144	1	0	Jcr4S12236.10	MSEESTSSNSSSSPLPSPSLPTTAAVGTAISKSKIIQEPVEKKAPKRARDNSSKHPVYRGVRMRSWGKWVSEIREPRKKSRIWLGTFPTAEMAARAHDVAAMSIKGNAAILNFPEIVDSLPRPVSLMPRDIQAAAAKAASMVEFNSLSSSSSSSSLLSESSSSSSSSSVSVSDDVSESEELSEIVELPNIEGSFDSAESVTEFILFDSVDGWVYPPPQDMCGEFSDQLMGLESLISSNFGASVWD	ATGTCAGAAGAAAGTACTAGCTCCAACTCCTCTTCATCTCCGCTACCATCACCATCTTTGCCCACAACCGCCGCCGTGGGCACTGCCATTAGCAAGTCCAAAATTATTCAAGAACCAGTAGAAAAAAAAGCACCGAAAAGAGCAAGAGATAACAGTAGCAAACACCCAGTCTATAGAGGCGTTAGGATGCGAAGTTGGGGTAAATGGGTATCGGAAATCCGTGAACCGAGAAAGAAATCACGTATTTGGCTTGGGACATTCCCCACGGCGGAAATGGCGGCCCGTGCTCATGATGTCGCCGCTATGAGTATTAAAGGTAATGCTGCCATTCTTAATTTTCCAGAAATCGTTGACTCACTGCCTCGGCCAGTTTCATTAATGCCGCGAGATATTCAAGCA…
32	ERF	III	Jcr4S16172.10	JcERFIII-18	Jcr4S16172	12151	13467	3	2	Jcr4S16172.10	MEDSSSSSSSQSSPSYSYSSSSSSITSHQIGVQKRKAERKKFRETRHPVYKGVRRKNGKWVSELRELQTKSRIWLGTSLIRHNKPGIAAFRLANGYAGLRDALGSENVRFQRKALNLIHYLLHENSSDCSIVNELGFPRMMLHLASSEDAEVREAALRGLLEIARDEAGGNGGRFGEEDEKLKQLLEERIKGISLMSAEDLGAAREERHLVDSLWNACYNEPSSLREKGLLVLPGEDSLPPDVASKHFEPPLRAWAANPDSNKNSSSAEKKQTPLLLGLGPPPEAANAQGTSNAKVNIDEQNTTSG	ATGGAGGACTCATCATCATCATCATCATCACAATCATCACCATCTTATTCTTATTCTTCTTCTTCTTCTTCAATAACATCCCATCAAATAGGCGTACAAAAGCGAAAAGCTGAACGCAAAAAGTTTAGAGAGACTCGCCACCCTGTGTACAAGGGCGTCCGGCGAAAAAATGGGAAATGGGTGAGTGAACTGAGAGAACTACAGACTAAGTCTCGGATATGGCTTGGAACGTCTTTAATTCGTCACAACAAGCCAGGTATTGCTGCATTTCGTCTGGCGAATGGTTATGCAGGCTTGAGAGATGCTTTGGGTTCTGAAAATGTGAGATTCCAAAGGAAAGCTCTCAACTTGATCCATTACCTACTACATGAGAATAGTTCAGATTGCAGCATAGTAAAT…
33	ERF	III	Jcr4S16208.10	JcERFIII-19	Jcr4S16208	1	649	1	0	Jcr4S16208.10 /partial	MECEAQPTASSSSSSSSTSSFPSDPMNNSNKMNSPKSSKRDQEVVNKSNNERNNKKAKAENAKIYPNYRGVRMRQWGKWVSEIREPRKKSRIWLGTYPTAEMAARAHDVAASTIKGHSAHLNFPELAHKLPRPASSSPKDIQAAAALAAALNYQNDNEVADLIISSQLGEPEPQWPDITEASHDTQESEDDTFIDLPDLLQDISHQFNEFCYLSSW	ATGGAGTGTGAGGCTCAACCAACCGCATCTTCTTCTTCTTCTTCTTCTTCAACCTCTTCTTTCCCTTCTGATCCGATGAATAACTCCAACAAAATGAATTCCCCAAAGAGCTCTAAGAGAGATCAAGAAGTAGTAAACAAAAGCAACAATGAAAGAAACAACAAGAAAGCGAAGGCAGAAAATGCAAAAATTTATCCAAATTATCGAGGAGTAAGAATGCGTCAATGGGGGAAATGGGTATCCGAAATCCGAGAACCAAGAAAGAAATCAAGAATTTGGTTAGGAACTTACCCAACAGCAGAAATGGCAGCTCGAGCTCACGATGTAGCAGCTTCAACAATAAAAGGCCATTCAGCTCATCTAAATTTCCCAGAGTTAGCTCACAAGCTTCCTCGTCCT…
34	ERF	III	Jcr4S22649.10	JcERFIII-20	Jcr4S22649	2107	2763	1	0	Jcr4S22649.10	MEDSSSSSSSQSSPSYSYSSSSSSITSHQIGVQKRKAERKKFRETRHPVYKGVRRKNGKWVSELRELQTKSRIWLGTFPNPEMAARAYDVAVKALRGNTASLNFPETAHLLPQVGSTSIKDIQCAALEAAGVHGGGGDVQCASSSSSLKASVEEGYNNNNNNNNDNKMFLDEEELFNMPALLDSMAEGLILTPPAMKRGFSWNDTKEEDTVDLTLWSD	ATGGAGGACTCATCATCATCATCATCATCACAATCATCACCATCTTATTCTTATTCTTCTTCTTCTTCTTCAATAACATCCCATCAAATAGGCGTACAAAAGCGAAAAGCTGAACGCAAAAAGTTTAGAGAGACTCGCCACCCTGTGTACAAGGGCGTCCGGCGAAAAAATGGGAAATGGGTGAGTGAACTGAGAGAACTACAGACTAAGTCTCGGATATGGCTTGGAACGTTTCCAAACCCTGAAATGGCAGCGAGAGCTTATGATGTAGCTGTTAAAGCACTTCGGGGAAATACGGCGTCATTAAACTTTCCTGAAACAGCGCATTTGTTGCCTCAAGTTGGGTCAACCTCTATAAAGGATATTCAATGCGCCGCATTGGAAGCTGCAGGTGTTCAT…
35	ERF	III	Jcr4S25695.20	JcERFIII-21	Jcr4S25695	7069	7643	1	0	Jcr4S25695.20 /partial	MEFDNGSIPISSICRFPPEVVMKKRKAGRTKFKETRHPFYRGVRRRNGNKWVCEVREPNKNKSRIWLGTFPTPEMAARAHDIAALALRGDLAILNFPDSASVLPRPKSSSAKDIKRVVRAFVSTTPSVSPSSSSCSYMSTTSQPYLVDHRSNDEFESCYNETREVSESNALFMDEEALFNMPVLLDSLAEG	ATGGAGTTTGATAATGGTTCTATCCCAATTTCTTCGATCTGCCGATTTCCTCCTGAAGTTGTCATGAAAAAGAGGAAGGCAGGAAGGACTAAGTTTAAGGAAACCAGACACCCATTTTATAGAGGTGTTCGACGAAGAAATGGAAATAAATGGGTATGTGAAGTGCGAGAACCAAATAAGAACAAGTCAAGGATTTGGTTAGGTACGTTTCCTACTCCAGAAATGGCAGCTAGGGCACACGACATTGCTGCTCTGGCATTAAGAGGAGATCTTGCTATACTAAACTTCCCTGATTCTGCTTCGGTACTTCCAAGACCGAAGTCTTCTTCTGCAAAAGATATTAAAAGGGTCGTTCGAGCTTTTGTATCAACTACTCCTTCAGTATCACCATCATCATCT…
36	ERF	III	Jcr4S27135.10	JcERFIII-22	Jcr4S27135	635	1312	1	0	Jcr4S27135.10	MDFLSCYSDPLPFGGFDSPVSDSCSAPARTNFSDEELMLASSYPKKRAGRKKFRETRHPVYRGVRRRNSGKWVCEVREPNKKSRIWLGTFPTAEMAARAHDVAALALRGRSACLNFADSSWRLPVPASSDPKDIQKAAAEAARAFRPVEADGLLGDEFRQENKRATETAEAEGMFYMDEEAVFGMPGLLANMAEGMLLPPPQCVAENGDDIEADSADVPLWSFSI	ATGGATTTTCTCTCTTGCTACTCCGACCCACTTCCTTTTGGCGGCTTCGATTCTCCAGTGTCGGATAGTTGCAGTGCTCCAGCTCGTACAAATTTTTCCGATGAAGAATTGATGTTAGCTTCCAGCTATCCAAAGAAACGGGCTGGCAGAAAGAAATTCCGGGAGACTCGCCATCCCGTTTACCGAGGAGTTCGTAGGAGAAACTCCGGGAAGTGGGTTTGTGAAGTTAGAGAACCTAATAAGAAATCAAGAATATGGTTAGGAACTTTTCCCACGGCGGAAATGGCAGCACGGGCTCACGACGTGGCGGCGCTGGCACTTAGAGGTAGGTCTGCGTGTTTGAATTTTGCAGACTCGTCATGGCGGTTGCCAGTACCAGCTTCGAGTGATCCAAAGGAC…
37	ERF	III	Jcr4U30981.10	JcERFIII-23	Jcr4U30981	614	1201	1	0	Jcr4U30981.10	MEQPPFTEDDPATTTTTTTTATSPQDRINRNSDASRCSGGTRHPVYRGVRKRRWGKWVSEIREPRKKSRIWLGSFPVPEMAAKAYDVAAYCLKGCKAQLNFPEELEDLPRPSSCTARDIQAAAAKAANSMKKSNIANSDGDGDSNGDRENDDFWGEIELPELMNSGLNWSSCAWSFAGDCTWMDGEAPQQFMACL	ATGGAGCAACCACCATTTACTGAAGATGACCCGGCCACAACCACCACCACCACCACCACTGCCACCTCTCCACAGGACAGAATCAACCGTAATTCTGATGCTTCTCGATGCAGCGGCGGAACAAGACATCCAGTCTACCGTGGAGTCAGGAAACGGAGGTGGGGCAAATGGGTGTCGGAAATTCGCGAACCCCGTAAAAAATCACGAATTTGGCTAGGCTCATTTCCTGTACCGGAAATGGCTGCCAAGGCTTATGACGTGGCTGCTTATTGTCTTAAAGGTTGCAAAGCACAGCTTAATTTTCCAGAAGAGTTAGAGGACTTGCCTAGGCCATCCTCGTGCACGGCTAGAGATATTCAAGCAGCAGCAGCTAAAGCAGCAAATTCAATGAAAAAGAGC…
38	ERF	IV	Jcr4S00053.270	JcERFIV-1	Jcr4S00053	125303	126019	1	0	Jcr4S00053.270	MSKSIMTNSTIPEKKQLRKPAQASSRKGCMRGKGGPENALCTYKGVRQRTWGKWVAEIREPNRGARLWLGTFDTSHEAAMAYDAAARKLYGPEAKLNLPELHPNNNSRFPVETHSAQIQMGNQSQGQHNSSTMSSSPSSSSGSPIIRTNDVTPAYTHESSNTESNGTVVEEEANLWQNQQGIDDLWGNLNVNLPLFDDSIWAEAAMSIDFPAMEDTGIFASNLMDVTGWDALHTPWCM	ATGTCTAAATCAATCATGACTAATAGTACTATTCCAGAGAAAAAACAGCTGAGGAAGCCTGCTCAGGCTAGTTCAAGGAAAGGGTGCATGAGAGGCAAAGGAGGCCCAGAAAATGCTCTCTGCACTTACAAAGGTGTTCGCCAAAGGACTTGGGGAAAATGGGTTGCTGAAATTCGAGAACCCAATCGCGGTGCCCGTCTTTGGCTCGGTACTTTTGACACCTCTCACGAAGCTGCAATGGCTTACGATGCTGCTGCTCGTAAACTATATGGTCCCGAAGCCAAGCTCAACCTACCGGAGTTGCACCCCAACAATAATAGCCGCTTTCCAGTCGAAACCCATTCTGCCCAAATCCAAATGGGAAATCAATCTCAAGGACAGCATAATTCGAGTACTATG…
39	ERF	IV	Jcr4S00137.180	JcERFIV-2	Jcr4S00137	106691	107815	1	0	Jcr4S00137.180	MGQGYNVSSMPMEHTRKRRRRDSTCSVAETIQKWKEYNEFLDSCPNGDKPVRKIPAKGSRKGCMRGKGGPDNSRCNYRGVRQRTWGKWVAEIREPNRGPRLWLGTFPTAYDAALAYDEAAKAMYGNLARLNFPELSNSTSSSKDYMSSTTPSGYSSVATPAGSDSTTTSNHSEVCAFDDTKEHVVKIENGEGESKIKPEYPAVTDLVSPRCTPKQEVKNEEDDAKIPETKVPMKDDHKIPEIEVAVKDDLQHESKDDGTLNIEDYGWPNGLEGADFWKNFTVDEMFSVDELLGAIDKNPLDLDGQMLSTDNSDLQNDVVTPPLDLSFQLHSPYSKFNGNGNGDYGFDFLEPGRQEDNNIPLDDQGFFSLGGFET	ATGGGTCAAGGTTATAACGTGAGTTCTATGCCCATGGAGCATACAAGGAAAAGGAGGAGAAGGGATAGCACTTGCTCTGTTGCTGAAACCATTCAAAAGTGGAAAGAATATAATGAATTTCTTGATTCTTGTCCTAATGGTGATAAACCGGTTAGAAAAATTCCTGCTAAAGGTTCAAGAAAAGGATGTATGAGAGGTAAAGGAGGGCCTGATAACTCAAGGTGTAATTATAGAGGCGTTAGACAAAGAACATGGGGAAAGTGGGTTGCAGAGATTAGAGAACCAAACAGAGGGCCTAGGCTTTGGCTTGGTACTTTCCCAACTGCATATGATGCTGCTCTTGCTTATGATGAAGCTGCGAAAGCCATGTATGGTAATTTGGCGCGGCTTAATTTTCCT…
40	ERF	IV	Jcr4S01985.20	JcERFIV-3	Jcr4S01985	7357	8481	1	0	Jcr4S01985.20	MGQGYNVSSMPMEHTRKRRRRDSTCSVAETIQKWKEYNEFLDSCPNGDKPVRKIPAKGSRKGCMRGKGGPDNSRCNYRGVRQRTWGKWVAEIREPNRGPRLWLGTFPTAYDAALAYDEAAKAMYGNLARLNFPELSNSTSSSKDYMSSTTPSGYSSVATPAGSDSTTTSNHSEVCAFDDTKEHVVKIENGEGESKIKPEYPAVTDLVSPRCTPKQEVKNEEDDAKIPETKVPMKDDHKIPEIEVAVKDDLQHESKDDGTLNIEDYGWPNGLEGADFWKNFTVDEMFSVDELLGAIDKNPLDLDGQMLSTDNSDLQNDVVTPPLDLSFQLHSPYSKFNGNGNGDYGFDFLEPGRQEDNNIPLDDQGFFSLGGFET	ATGGGTCAAGGTTATAACGTGAGTTCTATGCCCATGGAGCATACAAGGAAAAGGAGGAGAAGGGATAGCACTTGCTCTGTTGCTGAAACCATTCAAAAGTGGAAAGAATATAATGAATTTCTTGATTCTTGTCCTAATGGTGATAAACCGGTTAGAAAAATTCCTGCTAAAGGTTCAAGAAAAGGATGTATGAGAGGTAAAGGAGGGCCTGATAACTCAAGGTGTAATTATAGAGGCGTTAGACAAAGAACATGGGGAAAGTGGGTTGCAGAGATTAGAGAACCAAACAGAGGGCCTAGGCTTTGGCTTGGTACTTTCCCAACTGCATATGATGCTGCTCTTGCTTATGATGAAGCTGCGAAAGCCATGTATGGTAATTTGGCGCGGCTTAATTTTCCT…
41	ERF	IV	Jcr4S03169.20	JcERFIV-4	Jcr4S03169	11193	12059	1	0	Jcr4S03169.20	MENCRKSPLKPWKKGPTRGKGGPQNAMCEYRGVRQRTWGKWVAEIREPKKRSRLWLGSFATAEEAAMAYDEAARRLYGPDAYLNLPHLQPSLINNKSNNSNKFKWIPSKNFISMFPSSCGLLNIHAQPSVHVIHQRLQEFKKNSNVSSSSSSDSKIIITEKPHVENPPLMEKQVEITTSEKPQIDLNEFLQQMGIIKVDRQQEEESDTTESCLVQESQVKEDEFYNNYNNNNNLGALADKSFNWDSLIDMHGIGGGGDYDQGVESSGTLQVYDAQDELAAFPASIWNF	ATGGAAAATTGCAGGAAATCTCCATTGAAGCCATGGAAGAAGGGTCCGACAAGAGGCAAAGGTGGTCCGCAAAATGCCATGTGCGAGTATCGAGGAGTTCGACAAAGAACTTGGGGCAAATGGGTAGCAGAAATTAGAGAACCCAAAAAAAGAAGTAGACTTTGGTTAGGTTCTTTTGCAACTGCAGAAGAAGCTGCCATGGCTTATGATGAAGCTGCAAGAAGATTATATGGACCAGATGCTTATCTCAATCTTCCTCATCTTCAACCTTCTTTAATTAACAACAAATCTAATAACAGTAATAAGTTCAAATGGATTCCTTCCAAGAATTTTATTTCCATGTTTCCTTCTTCTTGCGGGTTACTTAATATTCATGCACAACCTAGTGTGCATGTTATT…
42	ERF	IV	Jcr4S04186.20	JcERFIV-5	Jcr4S04186	16354	17415	1	0	Jcr4S04186.20	MGERKVSSCAEIVSSKNKKIPRKRVEDTLEEWRSEIDEIPKRRPKGSRKGCMRGKGGPENQSCNYRGVRQRIWGKWVAEIREPAGKGPRNRHWLGTFETAVEAAQAYDNAAKTMYGSNAVLNFPDYSSEISSSKLNLLDCSGFDGFEQLRDEKLENCISTTDCRISHGVEQTNAEFAEDGYGSSQGETKITKAELHMDFDDATTDYMSFNEAEMPIMRKVMEGEISRTESDFMVRHDNVSNDCTDINCYTETDIKPSTHQDGNENSVLKPEGNYDYKDFELGFTNFQQGNCSSNISCEMQNPSANLPDSLNHTKERNRNFESNFDPMEPDFNWDSVEEELGLSIEPWFPEFGF	ATGGGGGAAAGAAAGGTGAGTTCTTGTGCAGAGATTGTTAGTAGCAAAAACAAGAAAATACCAAGGAAGAGAGTAGAGGATACACTTGAAGAATGGAGGAGCGAAATTGATGAAATTCCTAAGCGTCGGCCAAAGGGATCAAGAAAAGGTTGTATGAGAGGAAAAGGTGGACCAGAGAATCAGAGTTGCAATTATAGAGGTGTTAGACAGAGAATTTGGGGCAAATGGGTTGCAGAAATTAGAGAACCTGCAGGAAAAGGACCTAGGAATAGACATTGGCTGGGTACATTTGAGACTGCCGTTGAAGCAGCTCAGGCTTATGATAATGCGGCCAAGACTATGTATGGTTCTAATGCTGTACTCAATTTCCCTGATTACTCTTCGGAAATATCATCATCA…
43	ERF	IV	Jcr4S09760.20	JcERFIV-6	Jcr4S09760	5710	6351	1	0	Jcr4S09760.20	MRRSRKGCMKGKGGPENALCTYRGVRQRTWGKWVAEIREPNRGNRIWLGTFNTSDEAARAYDQAALKLYGSSATLNLPQYCFNLPIGTASNSNISAGTCQNVIGSSNNEEISSSCASMCQDLIGSCSSEVITGGARNSNTCAIGCESCSSSSCLIGGLGDNDFYWPQDELDIENHFMDNTFFGGAGIGGGTGIGGDGFSWDGSGNTWGGAWGF	ATGAGAAGATCAAGAAAAGGGTGCATGAAAGGGAAAGGAGGACCAGAAAATGCACTATGTACTTACAGAGGAGTAAGGCAGAGAACATGGGGAAAATGGGTTGCTGAAATAAGAGAACCAAATAGAGGTAATAGAATTTGGTTAGGTACTTTCAATACGTCAGATGAAGCAGCTAGGGCTTATGATCAAGCTGCCCTTAAACTTTATGGCTCTTCTGCTACCCTAAACTTGCCACAGTACTGCTTTAACCTACCAATAGGTACTGCTAGTAACAGCAATATTAGTGCCGGTACATGTCAAAATGTTATTGGCAGCTCTAATAATGAAGAAATTAGCAGTTCATGTGCTAGTATGTGTCAAGATCTTATTGGAAGCTGTAGTAGTGAAGTAATTACTGGC…
44	ERF	IV	Jcr4S13987.10	JcERFIV-7	Jcr4S13987	2271	3302	1	0	Jcr4S13987.10	MDSNPSQDPITTATTTSETITTTTIAAGVTSDTTSDSNNTSSDSAGKKCKGRGGPDNSKFRYRGVRQRSWGKWVAEIREPRKRTRKWLGTFASAEDAARAYDRAAIILYGSRAQLNLQPLNSSSAQNSSSSSSSRGGGSGGNGSSSSSTQTLRPLLPRPSGFGFSFSLSSTSMASPAAVAAASSGFVPYGVYQNLPNVVGSSTVLCTNNIVQNPQEQQITMSSNIPYQYQYQNPLSDYTSSLSAGHDPSSIPTTSYQNLNYDHNPHHQQQQEHGLYEDISSLVGSVGSSLSLSSNTQPIIAPANQDPVMHVGPGSPSLWPLTNDDEYPPSSIWDYGDPSLFDL	ATGGACTCTAATCCTTCCCAAGACCCCATTACCACCGCCACCACCACTTCTGAAACAATCACCACCACTACAATCGCTGCCGGCGTTACAAGTGATACCACCAGTGACAGTAACAATACCAGTAGTGATAGTGCAGGTAAGAAATGCAAAGGAAGAGGGGGTCCTGATAATAGTAAGTTTAGATACAGAGGTGTTAGACAAAGAAGCTGGGGAAAGTGGGTCGCTGAGATCCGAGAACCAAGAAAGCGAACCCGTAAATGGCTCGGTACTTTCGCCTCCGCAGAAGACGCTGCTCGTGCTTATGACCGCGCCGCAATCATTCTTTACGGTTCTAGAGCTCAGCTTAATTTGCAACCTCTAAATTCTTCCTCTGCTCAAAACTCTTCCTCTTCCTCCTCC…
45	ERF	V	Jcr4S00031.20	JcERFV-1	Jcr4S00031	14913	15716	1	0	Jcr4S00031.20	MEIQFQQQKQHKSSSVPVNKTSKFKGRHRPNNNNNKFVGVRQRPSGRWVAEIKDTTQKIRMWLGTFETAEEAARAYDEAACLLRGSNTRTNFITQVSLDSPLASRIRNLLKNKKAGKKQQREEENLEVSTPSNSTVTTSTCTSSSSSSSIDNSTPSGEIVNDTQFFDDVYKPDMSNCREEFELGPFQSDLSWGFGSGLDRFSFTQEVLDFPRNMLLPETSDLEFTEFDRMKVERQISASLYAMNGVQEYMETVHDPTEALWDLPPIC	ATGGAAATTCAGTTCCAACAACAAAAGCAGCATAAAAGCTCGAGCGTTCCAGTGAATAAAACAAGCAAATTCAAGGGAAGACATAGACCTAACAACAATAATAATAAGTTTGTTGGTGTTAGACAAAGGCCTTCTGGTAGATGGGTGGCAGAGATAAAAGACACAACACAAAAGATAAGGATGTGGCTTGGCACCTTTGAGACAGCAGAAGAAGCTGCGAGAGCGTATGATGAAGCTGCCTGTCTTCTTCGCGGATCAAATACACGCACCAACTTCATCACTCAAGTCTCCTTGGATTCTCCTCTGGCTTCCAGGATCCGAAATCTACTCAAAAACAAGAAAGCAGGAAAAAAACAACAAAGGGAAGAAGAAAATCTTGAAGTATCTACCCCATCAAAT…
46	ERF	V	Jcr4S00037.60	JcERFV-2	Jcr4S00037	29173	29831	2	1	Jcr4S00037.60	MARPQQRYRGVRQRHWGSWVSEIRHPLLKTRIWLGTFETAEDAARAYDEAARLMCGPRARTNFPYNPNASQSSSSKLLSATLTAKLHRCYMASLQMTKQTSLYEQQKQKAPTSFHNTTSTTTPTNGIAIKNEEMGTLLQEKCPLQFQVDNTQQFKPLEDHHIEQMIEELIDYGSIEICSTVSHQPL	ATGGCAAGACCACAACAGCGATATCGAGGCGTTCGACAAAGGCATTGGGGTTCTTGGGTATCTGAAATTCGCCACCCTCTATTGAAGACTAGAATTTGGCTAGGCACATTCGAGACGGCTGAGGATGCAGCACGAGCCTATGATGAAGCTGCAAGGCTTATGTGTGGACCAAGAGCTAGGACCAACTTCCCTTATAACCCAAACGCATCACAATCATCATCATCCAAACTTCTCTCTGCAACTTTGACGGCCAAATTGCACAGGTGCTATATGGCTTCACTGCAAATGACCAAACAAACATCACTTTATGAACAGCAAAAACAAAAGGCGCCAACTTCATTTCATAACACGACAAGCACAACCACTCCCACTAATGGCATTGCCATAAAAAATGAGGAA…
47	ERF	V	Jcr4S00086.100	JcERFV-3	Jcr4S00086	36939	37743	2	1	Jcr4S00086.100	MVQSKKFRGVRQRHWGSWVSEIRHPLLKRRVWLGTFETAEEAARAYDEAAILMSGRNAKTNFPVVTSNQEGISNDKSSLSSPLSTSALSSFLKAKLRKCCKSPPSLTCLRLDTENSHIGVWQKRAGPRSDSNWVMIVDQLGKKDEEEAKPKLSSSETTEILIGQEVGHVGGGNDGRGGSGGRDSLDEEQRVALQMIEELLNRN	ATGGTACAATCAAAGAAGTTCAGAGGTGTCAGGCAACGCCACTGGGGCTCGTGGGTTTCTGAGATTCGTCATCCATTACTGAAAAGAAGGGTGTGGCTTGGTACATTTGAGACAGCTGAAGAGGCAGCAAGAGCCTATGATGAGGCAGCAATTTTAATGAGTGGCCGTAATGCCAAAACCAACTTCCCTGTGGTTACGAGTAATCAAGAAGGCATTAGTAATGACAAGTCTTCATTATCCTCTCCTTTGAGTACTAGTGCACTATCTTCCTTTCTTAAAGCAAAGCTTCGCAAATGTTGCAAGTCTCCTCCTTCTCTCACTTGCCTAAGGCTTGACACTGAGAATTCTCATATTGGGGTATGGCAAAAGCGAGCTGGACCGCGCTCTGATTCAAATTGG…
48	ERF	V	Jcr4S00290.120	JcERFV-4	Jcr4S00290	78464	79160	2	1	Jcr4S00290.120	MVHSKKFRGVRQRHWGSWVSEIRHPLLKRRIWLGTFETAEEAARAYDQAAILMSGRNAKTNFPINQDPNPSEPSSSTNAASCYQSNGLSEILHAKLRKCSKAPSPSMTCLRLDTENSHIGVWQKRAGQRSDSDWVMTAQLGNRDHQEGSDSTLASGESSKTLPVPELKSEMDEEERIALQMIEELLNRNCPSPSFGVQDEDGSFFL	ATGGTGCATTCAAAGAAGTTCAGAGGAGTTAGGCAGCGTCATTGGGGTTCTTGGGTATCCGAAATCCGACATCCTTTATTAAAGAGGAGGATCTGGCTAGGGACATTTGAAACAGCAGAAGAAGCGGCTAGAGCATATGATCAAGCTGCAATTTTAATGAGTGGTCGAAATGCTAAAACCAACTTCCCGATAAATCAAGACCCGAACCCTAGCGAGCCTTCATCATCTACTAATGCTGCTAGTTGTTATCAGTCAAATGGTTTATCTGAAATCCTTCACGCTAAGCTTAGAAAGTGTAGCAAGGCACCATCGCCGTCGATGACTTGTTTAAGACTTGATACTGAGAATTCCCACATTGGGGTATGGCAAAAACGTGCAGGACAGCGCTCTGATTCTGAC…
49	ERF	V	Jcr4S00570.70	JcERFV-5	Jcr4S00570	38976	40289	1	0	Jcr4S00570.70	MGRKRKVGQENLEDKNNSCSDQGTMAWDEMVKEAAIGGVRRARKRFVGVRQRPSGRWVAEIKDTIQKIRVWLGTFDTAEEAARAYDEAACLLRGANTRTNFWPSSPSSSATTSALPSKITNLLLQRLKARNSNNNSGNCPSPPLSTSTMVASSLASVINKKKQEKQQLLEGQVVTDFSADHTQFTDFLINGDPPQDFDHYISNNDHMVGSCSSVEFGSCLTDEREEEDRALDFDCNWITDDHITQSFCSGDVNNTNFHEEDGEVDMGGLDFQFIDNVDQSSLYCSPFDIFEEMEEPVEPETCYGDEPSMLRAAMKRMKYERKFSASLYAFNGIPECLRLKLGSGERSVSQLTNLRNACNKKKEEERKVLEEEEEEQDNISEAMEKKQEENPQSSIELES…	ATGGGTAGGAAAAGAAAAGTTGGTCAAGAAAACTTGGAGGACAAAAATAACAGTTGTTCTGATCAAGGAACAATGGCATGGGATGAGATGGTGAAAGAAGCAGCAATAGGAGGAGTAAGGAGAGCAAGAAAGCGATTCGTCGGTGTCCGGCAAAGGCCATCAGGAAGATGGGTAGCTGAGATTAAAGATACCATACAAAAAATAAGAGTATGGTTAGGTACTTTTGATACTGCAGAAGAAGCTGCAAGAGCTTATGATGAAGCTGCTTGTTTACTTCGCGGAGCTAATACAAGAACCAATTTTTGGCCTTCTTCTCCTTCGTCTTCTGCAACGACTTCAGCTCTTCCTTCTAAGATTACCAATCTTCTTCTTCAAAGACTCAAAGCAAGAAATAGTAAC…
50	ERF	V	Jcr4S00732.10	JcERFV-6	Jcr4S00732	1672	2689	2	1	Jcr4S00732.10	MVQSKKFRGVRQRQWGSWVSEIRHPLLKRRIWLGTFETAEAAARAYDQAAILMNGQNAKTNFPRSDLEEARDNHIINSNNNNEYPLPPKALSELLDTKLRKCCKDPSLASLTCLRLDNDSSHIGVWQKRGGSSSSSNWVMRVELGNKKTQVTEEEEEEDGSSLSSVSSLSSVLSQAVGDERKNGTDEEDRIAMQMVEELLNWN	ATGGTACAATCAAAGAAATTCAGAGGCGTCAGGCAACGCCAGTGGGGCTCCTGGGTCTCTGAAATTCGCCACCCTTTACTGAAAAGGAGGATATGGCTAGGGACATTTGAGACAGCAGAGGCAGCAGCAAGAGCTTATGACCAAGCAGCTATATTGATGAATGGACAAAATGCGAAGACTAATTTTCCAAGGAGTGACCTGGAAGAGGCAAGGGATAATCATATCATCAACAGTAACAACAACAATGAATATCCATTGCCTCCTAAGGCTCTTTCTGAGCTACTCGATACTAAACTCAGGAAATGCTGCAAAGACCCTTCACTGGCTTCACTAACTTGTTTAAGGCTAGACAATGACAGCTCTCACATTGGAGTGTGGCAAAAACGAGGCGGTTCTAGT…
51	ERF	V	Jcr4S01974.60	JcERFV-7	Jcr4S01974	16385	17206	1	0	Jcr4S01974.60	METLKNPSPTTKATKAISARRFVGVRQRPSGRWVAEIKDSSQRVRLWLGTYDTPEEAARAYDEAARALRGENARTNFASSVNNNNNNNLNSNQSNGGFVSESDGRHGLSFSSLKAKLSKNLQNIMARTTETKSTKNRVSDHFTFASIFHFRSQQYQKPVNIKNIEKVVQPSIIVPHAADEPSSWETSSVSDCSNEWIGFRQLGLDSDGSDIGEVSIGDGGFSEQMMGWIDSPEISGCSNEGSRSKRFKVSSSVVVPPTFESPSFCAFPFHGEN	ATGGAAACACTCAAGAACCCTTCTCCCACCACCAAAGCAACCAAAGCAATTTCAGCACGTAGATTTGTTGGAGTGAGGCAAAGACCATCAGGACGATGGGTAGCGGAAATAAAAGACTCTTCTCAACGAGTAAGGTTATGGCTTGGAACATATGATACGCCTGAAGAAGCTGCTAGAGCCTACGATGAGGCTGCTCGTGCTCTACGTGGAGAAAATGCTCGAACAAACTTTGCCTCCTCTGTTAATAATAATAATAATAATAATCTTAATTCCAACCAATCTAATGGTGGGTTCGTGTCGGAATCTGATGGAAGGCATGGTCTTAGCTTTTCTTCATTGAAGGCTAAATTAAGCAAGAACTTACAGAATATTATGGCTAGAACAACAGAGACTAAGTCC…
52	ERF	V	Jcr4S01993.30	JcERFV-8	Jcr4S01993	18539	19510	1	0	Jcr4S01993.30	MGAPLGKLSASPSGGLRGRKKSSRGHHRFVGVRQRPSGRWVAEIKDSLQKVRLWLGTFDTAEDAARAYDDAARALRGDNARTNFELPQSSTTNYSGAHVDNIEPFSFEDVCGTGSEAEGILGALKAKLLDNKGLKMFPPSNCSSSRQSGQIAISSHNNNNSNSSSSISLPYEGDLLLDQWHQTCLVAATETAAWSNGRAYQVAAAWSTQINHTVEGVASFESNAIATNTNNVSTWQFPSGSTEPTIDMPYSNLCPVELPTSKQQQQSSLSPKLVGVSYLSRIGNINGTSQTIDGVAEGVWSSEQQFQPCENSGWDPLLYALQC	ATGGGGGCACCTTTAGGAAAATTGTCGGCATCACCAAGTGGCGGACTGCGAGGAAGAAAGAAATCATCAAGAGGACACCACAGATTTGTAGGAGTAAGGCAGAGACCATCCGGCAGATGGGTGGCGGAGATTAAGGACTCCTTACAGAAGGTTAGGCTCTGGCTTGGAACTTTCGACACCGCAGAAGATGCAGCTCGAGCATATGATGATGCAGCTCGCGCTTTGCGCGGAGATAATGCTCGAACGAACTTTGAATTGCCACAGTCATCAACAACCAACTATTCTGGTGCACATGTAGATAATATTGAGCCTTTCTCATTTGAAGATGTTTGTGGTACAGGTAGTGAAGCTGAAGGAATTCTTGGTGCACTTAAGGCCAAGCTACTTGACAATAAGGGA…
53	ERF	V	Jcr4S03474.20	JcERFV-9	Jcr4S03474	7765	8505	1	0	Jcr4S03474.20	MDKKESSKVDLFQENPLHQANISDQIKRIRVPPRCNKNGALKRFLGVRQRPSGRWVAEIKDSSQKLRLWLGTFDSAEEAAMAYDSAARLLRGRNAKTNFVYEKNNGSGIISTHQESKLLGKNPRLHQLLQLAIIKNHARSSSSSSSSSSLASASDNNDKIPWMGQDFGTMVEDTIICSSSYDQDCYGNSSTSSKICGLSSFGTAKVYSSVIIAPSFSASSSSSSSSSSSPHPLCNQSGDENKSKEG	ATGGACAAGAAAGAGAGCTCAAAAGTTGATCTATTTCAAGAAAACCCTCTTCATCAAGCAAATATTTCAGATCAAATAAAAAGAATAAGAGTACCGCCAAGATGCAATAAAAATGGAGCATTAAAAAGATTTCTTGGAGTGAGGCAGAGACCTTCAGGAAGATGGGTTGCTGAAATCAAAGATTCATCACAAAAGCTAAGGCTATGGTTAGGGACTTTCGATTCAGCAGAAGAAGCTGCTATGGCTTATGACAGTGCAGCTAGGCTTTTAAGAGGAAGAAATGCAAAGACCAACTTTGTTTATGAGAAAAATAACGGAAGTGGAATTATTTCTACTCACCAAGAAAGCAAGCTTTTAGGGAAAAATCCAAGATTACACCAACTTCTTCAACTCGCAATT…
54	ERF	V	Jcr4S05797.10	JcERFV-10	Jcr4S05797	2818	3462	1	0	Jcr4S05797.10	MWLGTFDTAEEAARAYDEAACLLRGSNTRTNFTNHVSTNSPISIKIRNLLNHKKNSKQNCPAITTSKKATIKPTTIISSSSNILAANNSNDNNSSDVRQENQQTYDDVYRPDLSNCNMGLELAGSSQLYYSWPLPTGFDQIPLMQEEWARNVSQLCDPSHELELAEFEQMKVERQISASLYAMSGVSEYLQSANYDPNEALWDLHTMGHLFCHT	ATGTGGCTTGGGACTTTTGATACAGCAGAAGAAGCTGCTCGAGCTTACGATGAAGCTGCATGCTTGCTTCGTGGTTCGAACACTCGAACCAACTTCACTAATCATGTTTCTACTAATTCCCCTATCTCTATCAAGATCAGAAATCTCCTCAATCACAAGAAGAACTCGAAACAAAATTGTCCTGCAATTACCACTTCAAAGAAAGCCACTATCAAACCAACTACTATAATTAGCAGTAGCAGCAATATTTTAGCAGCAAATAATAGCAATGATAATAACAGCAGTGATGTTAGACAAGAAAACCAGCAGACGTATGATGATGTGTACAGACCAGATTTGAGCAACTGCAATATGGGGCTCGAACTGGCCGGTTCATCTCAACTTTACTATTCATGGCCA…
55	ERF	V	Jcr4S07759.20	JcERFV-11	Jcr4S07759	13116	13811	2	1	Jcr4S07759.20	MARQQQRYRGVRQRHWGSWVSEIRHPLLKTRIWLGTFETAEDAARAYDEAARLMCGPKARTNFPYNPNEPQSSSSKLLSATLAAKLHKCHMASLQVTKNKNVNKQTHNDQAQYCKPFDTSNGIAGKSIETSFSWPEGDWVGEESQVGNSQGQEFKALEDHHIEQMIEELIDYGSMEFCSASST	ATGGCTAGACAGCAACAACGGTACCGCGGCGTCCGTCAAAGGCATTGGGGCTCTTGGGTATCTGAAATCCGCCACCCTCTACTGAAGACTAGAATATGGCTAGGCACATTCGAAACGGCGGAGGATGCAGCGCGAGCCTACGACGAGGCAGCAAGACTAATGTGTGGACCAAAAGCACGCACAAATTTTCCATACAACCCTAATGAGCCACAATCATCTTCTTCAAAGCTTCTATCTGCAACTCTTGCAGCTAAGCTACATAAATGTCACATGGCATCTTTACAAGTGACCAAAAATAAAAATGTCAATAAACAAACACATAATGATCAAGCACAATATTGTAAACCATTTGACACTAGCAATGGCATTGCCGGAAAAAGTATAGAAACCAGCTTTTCT…
56	ERF	V	Jcr4S19837.10	JcERFV-12	Jcr4S19837	513	1686	1	0	Jcr4S19837.10 /partial	MSLMRKRKAKSTSHEEEPINYESISWDKVLEEAVTLTGELRPRKRYVGVRQRPSGRWVAEIKDTIQKIRVWLGTYDTAEEAARAYDEAACLLRGANTRTNFFPFSNSLKPALPSKISNLLLQRLKARNNQDSRKAKEIHFDNFLNCTATSSLSTTSDHFDTNSDDKYFLEHPKFLKGKELSEVDHTPTSCFTRQTLDCWADGPLGNLNESLNSNFNLENEEEKNQEVEKEKEEKIDMLKIDFSIHEDASISTYYSPFDIAEEMMAPIVEEDKNYNYNNGDNEQSLMVKEIMNRLNYERRFSASLYAYNGVHERLKLGYEGMEKSSNGSRSIKIESCDDKMSESNNSLRLIDINDNGEIIKKKKEEEKVQDQEIAGSSSSSSSSYSKEGGGD	ATGTCACTAATGAGGAAGAGAAAGGCAAAATCTACTAGCCATGAAGAAGAACCAATCAATTATGAATCCATTTCTTGGGACAAAGTACTGGAGGAGGCTGTCACACTTACTGGTGAATTGAGACCTCGAAAAAGATACGTAGGCGTCCGGCAACGGCCTTCGGGACGATGGGTGGCGGAGATAAAAGACACCATACAAAAGATTAGGGTTTGGTTAGGCACTTATGATACTGCTGAAGAAGCTGCAAGAGCTTATGATGAAGCTGCTTGCTTGCTTCGTGGAGCTAACACTCGAACAAACTTCTTTCCTTTCTCGAATTCTTTAAAACCTGCCCTTCCTTCCAAAATATCTAATCTTTTGTTGCAAAGGCTGAAAGCAAGAAACAACCAAGATTCAAGG…
57	ERF	V	Jcr4S26817.10	JcERFV-13	Jcr4S26817	1	287	1	0	Jcr4S26817.10 /short	MSLMRKRKAKSTSHEEEPINYESISWDKVLEEAVTLTGELRPRKRYVGVRQRPSGRWVAEIKDTIQKIRVWLGTYDTAEEAARAYDEAACLLRGA	ATGTCACTAATGAGGAAGAGAAAGGCAAAATCTACTAGCCATGAAGAAGAACCAATCAATTATGAATCCATTTCTTGGGACAAAGTACTGGAGGAGGCTGTCACACTTACTGGTGAATTGAGACCTCGAAAAAGATACGTAGGCGTCCGGCAACGGCCTTCGGGACGATGGGTGGCGGAGATAAAAGACACCATACAAAAGATTAGGGTTTGGTTAGGCACTTATGATACTGCTGAAGAAGCTGCAAGAGCTTATGATGAAGCTGCTTGCTTGCTTCGTGGAGCTAA
58	ERF	V	Jcr4U29927.10	JcERFV-14	Jcr4U29927	61	471	1	0	Jcr4U29927.10 /partial	METLKNPSPTTKATKAISARRFVGVRQRPSGRWVAEIKDSSQRVRLWLGTYDTPEEAARAYDEAARALRGENARTNFASSVNNNNNNNLNSNQSNGGFVSESDGRHGLSFSSLKAKLSKNLQNIMARTTETKSTKNR	ATGGAAACACTCAAGAACCCTTCTCCCACCACCAAAGCAACCAAAGCAATTTCAGCACGTAGATTTGTTGGAGTGAGGCAAAGACCATCAGGACGATGGGTAGCGGAAATAAAAGACTCTTCTCAACGAGTAAGGTTATGGCTTGGAACATATGATACGCCTGAAGAAGCTGCTAGAGCCTACGATGAGGCTGCTCGTGCTCTACGTGGAGAAAATGCTCGAACAAACTTTGCCTCCTCTGTTAATAATAATAATAATAATAATCTTAATTCCAACCAATCTAATGGTGGGTTCGTGTCGGAATCTGATGGAAGGCATGGTCTTAGCTTTTCTTCATTGAAGGCTAAATTAAGCAAGAACTTACAGAATATTATGGCTAGAACAACAGAGACTAAGTCC…
59	ERF	VI	Jcr4S00001.70	JcERFVI-1	Jcr4S00001	32414	33474	2	1	Jcr4S00001.70	MMEQSILCPMKYTEHKQVTKKFTKPSLKPRKDDRNRLEHNPPRVVRISVTDPDATDSSSDEEGELFGRQRVKRYVNEISIEEGCKEIIPIANGRKRAGTELPAAHRRLKLNTANSNNGRKYRGVRQRPWGKWAAEIRDPGRRVRLWLGTYDTAEEAAMVYDNAAIKLRGPDALTNFMTPPRREEAAEAETEQVEEKTETNATSTSGYESGGPSLFDDDTITKTTSNIVLQETISSHEDFSDIFADMPQDFGSFNHQEDDFFQDIGDLFFSEPLVAL	ATGATGGAACAAAGTATCCTATGTCCTATGAAGTACACTGAACACAAACAAGTCACGAAAAAATTTACAAAACCATCCTTAAAGCCCAGAAAGGATGACAGGAATCGGTTAGAGCACAATCCGCCGCGGGTTGTACGGATATCAGTGACGGACCCCGACGCCACCGACTCCTCCAGCGATGAAGAAGGCGAGTTGTTTGGCCGCCAGAGAGTTAAACGCTATGTGAATGAAATTAGCATCGAAGAAGGCTGCAAAGAAATCATTCCTATAGCCAATGGAAGAAAAAGAGCAGGTACTGAATTACCGGCGGCTCACCGGCGGCTCAAACTGAATACAGCTAATTCTAATAATGGCAGGAAGTACCGCGGTGTAAGACAACGGCCATGGGGAAAATGGGCC…
60	ERF	VI	Jcr4S00022.290	JcERFVI-2	Jcr4S00022	129176	130500	2	1	Jcr4S00022.290	MNPSSVKYSEHKTVTNKLVKFNDSNATRIVRICVTDGDATDSSSDENEESRTHQRVKKHINEIRIEDCVKYRATEKGEVKLGFNKQQQQRKNTRDQRYYPEGKKYRGVRQRPWGRFAAEIRDPSRRTRIWLGTFDTAEEAAMVYDKAAIQIKGTNALTNFIKPPVRSPPPDVDITNGYDSCKEETHSLSSPTSVLRFQYNEEGANDENWESDQVKQVKDWRQPEELREDLAGEDCLANLGLDFDEFLEFEHHAPIFFDECSIPDTLLRRDDVADISFHFRPRFRCKEIEKWRGFVIYHKIFLASNGAGTQKGVPAYAKWLKKVIHVQRLATLGT	ATGAATCCATCGTCTGTAAAGTACAGCGAGCATAAAACAGTTACTAATAAGCTTGTTAAATTTAATGACTCAAACGCCACGAGAATAGTGCGAATTTGTGTTACAGACGGAGATGCAACTGACTCGTCGAGCGATGAGAATGAGGAATCAAGGACTCATCAACGAGTTAAGAAACACATAAATGAGATTCGAATTGAAGATTGTGTTAAATACAGAGCAACTGAAAAGGGAGAAGTAAAATTGGGCTTTAATAAGCAGCAGCAGCAAAGGAAAAATACCAGAGATCAGCGTTATTATCCGGAGGGTAAAAAATACCGTGGTGTTCGACAAAGACCATGGGGAAGATTTGCAGCTGAAATTAGAGACCCATCCCGACGAACGAGAATATGGTTAGGGACT…
61	ERF	VI	Jcr4S00719.140	JcERFVI-3	Jcr4S00719	62553	63587	1	0	Jcr4S00719.140	MDQNSLMSMNPVKFSEHRNHTKVLRPLSNPAPEAKPPRVVRISVTDADATDSSSDEEGDFYRKQRVKKFVNEITIESCSGESDGIWRSRSSRSSRRKSSSAKTGGGPARVLMVRGTTAGAGKKFRGVRQRPWGKWAAEIRDPLRRVRLWLGTYDTAEEAARVYDNAAIQLRGPDALTNFTTPPAKCSPPTPTTKPAVSSGYNSGEESHNNNRVCSPTSVLRFPSSTSSNEEAESQSVLSSKEVQEFGNGAREIKEESCVSENLSNFSEYSSIDTLFSNDIFDFQNSISDIFQETSMEDGFLKDDFGEMFTDCIRDLDFGFTNWNVDDDFQDIGDLFGSDPLIAF	ATGGATCAAAATAGTCTTATGTCCATGAATCCAGTCAAGTTCAGCGAACATCGAAATCACACAAAAGTTTTAAGGCCATTGTCAAATCCGGCGCCAGAGGCCAAACCACCCAGAGTTGTGCGGATATCAGTAACTGACGCAGACGCTACCGACTCTTCCAGCGACGAAGAAGGTGACTTCTACAGAAAACAGAGAGTGAAGAAATTTGTTAACGAGATTACGATAGAGTCATGTTCAGGAGAAAGCGACGGTATTTGGAGAAGCAGGTCATCGAGAAGTAGCCGGAGAAAGTCTTCTTCAGCAAAAACCGGTGGTGGTCCGGCGAGGGTGCTGATGGTGAGGGGTACAACAGCAGGAGCGGGGAAAAAGTTTAGAGGTGTGAGACAGAGGCCTTGGGGA…
62	ERF	VI	Jcr4S04290.40	JcERFVI-4	Jcr4S04290	23515	24267	1	0	Jcr4S04290.40	MSVQSETEQVYTNTKRRLVRIILTDPYATDSSSEEEEEKRHENEKPVKEKKFVKKVKRLVTEISYESTRPPVSSTTTATKQEPTKTTTSRSPGSGLTRRNKFRGVRQRPWGRWAAEIRDPTRRKRVWLGTFDTAEEAATVYDRAAVKLKGPNAVTNFPNSVMTGNVVDRQKDGGSESCDSPTTSIVTSSPTSVLRYDEELTPFDGFSYGDVDAFGFDIEGLNLEDFMLTAKNFGREEFVDLDDFLVDVIA	ATGTCCGTACAATCTGAGACCGAGCAGGTATATACCAACACTAAAAGAAGACTCGTCCGAATCATCTTAACCGACCCTTATGCTACTGATTCCTCTAGCGAAGAAGAAGAAGAGAAAAGGCACGAAAACGAAAAGCCAGTAAAGGAAAAGAAATTTGTGAAGAAAGTAAAGAGGCTGGTCACAGAAATAAGCTACGAGTCAACGAGACCACCAGTCTCTAGTACTACTACTGCTACTAAACAAGAGCCTACTAAAACGACAACTTCAAGATCGCCGGGATCTGGACTCACTCGCCGGAATAAGTTCCGTGGTGTCCGTCAAAGGCCTTGGGGCCGTTGGGCTGCTGAGATTCGAGACCCGACCCGCCGGAAACGGGTTTGGCTTGGCACCTTTGATACA…
63	ERF	VI-L	Jcr4S00263.60	JcERFVI-L-1	Jcr4S00263	77464	79585	5	4	Jcr4S00263.60	MPRFDRLEKGEWHRIKERGRAWKRKEEGGDRESRSEVREKRKTQRSDLAVIGALSKLYHFSSALSVCCFSFGALCCGVFSYYMLLCCSQQRLNLGFTAVSMRLRPKRTRSGVECFGAMPEPRKRTLNQTRKATDAKSVSPEELEMEPKMRKIRVICHDPYATDSDSSDDESNGRNVRSFKSKRFVTEINLPFVVFPQSKASPEPESSCQDSNNSAKTPSKKRRVLSKTPTSTTTLTPATKPTVKKPVGVRQRKWGKWAAEIRNPVTKVRTWLGTYNTLEEAAQAYEAKKKEYDAMTMTTAASEKSQNVSSSMAVCQSQNINKNNKNSPSPVSSDDTGSILSHTSPSSVLELDASAVSNVNGDSSDLFKEEDLDLGLEFGNLIDDFGQLYDDYCGIEDLD…	ATGCCCCGTTTTGACCGCTTGGAAAAGGGTGAATGGCATAGAATAAAAGAGAGAGGGAGAGCGTGGAAGCGCAAAGAAGAAGGCGGAGACAGAGAGAGCAGAAGTGAAGTGAGAGAAAAGAGAAAGACACAAAGGTCTGATTTGGCTGTGATTGGGGCTCTGTCGAAGCTCTACCATTTTTCTTCTGCACTCTCTGTTTGCTGCTTCAGCTTTGGTGCTCTCTGTTGTGGTGTTTTTTCCTATTATATGCTTCTCTGCTGTTCTCAGCAGAGGTTGAATCTGGGTTTCACAGCTGTTTCGATGCGTTTGAGGCCAAAAAGGACTCGCTCTGGTGTCGAGTGTTTTGGGGCTATGCCAGAGCCTAGAAAGCGAACTTTGAACCAAACCAGAAAAGCCACA…
64	ERF	VI-L	Jcr4S02353.30	JcERFVI-L-2	Jcr4S02353	14180	14779	1	0	Jcr4S02353.30	MIATRKVRIICHDPDATDSSSDEDEAHINPIGAKRFVKEINLSMLPNESRSENCPGETSNGDKFKTKTRISSCSYRGVRRRPWGKYSAEIRDPFRKVRVWLGTYTTAEEAAAAYRKKKEEFDSKTAKNKLKNLSIPSKIDAVEESSDFFSHPSPSSVLDVSTTTTSLVHGLESSSNVEDKFSRVTDFRFMGRACAFPFC	ATGATTGCCACAAGAAAAGTTCGCATAATTTGCCATGATCCTGATGCCACAGACTCTTCAAGCGATGAAGATGAAGCACACATTAATCCAATCGGTGCTAAGCGTTTTGTAAAAGAAATCAATCTCTCAATGTTGCCGAATGAATCAAGAAGTGAGAATTGTCCAGGAGAAACTAGTAATGGAGACAAATTTAAAACTAAGACTAGAATATCATCCTGTAGTTACAGAGGGGTTCGAAGAAGGCCATGGGGGAAATATTCCGCAGAGATTCGAGATCCATTTCGAAAGGTTCGAGTATGGCTTGGTACTTACACGACTGCAGAAGAGGCTGCAGCTGCTTATAGGAAAAAGAAAGAGGAGTTTGACAGCAAAACGGCAAAGAACAAACTAAAGAATTTG…
65	ERF	VI-L	Jcr4S03834.10	JcERFVI-L-3	Jcr4S03834	4261	5049	1	0	Jcr4S03834.10	MPGLKNPMLDQNLSKIKQNNFISTRKVRIIYHDPEATDSSSDEDEELINGSSKRLFGNGKRFVREITLSTMQYETRIENSCKTKTKSNVYTSTKLGDKRTRMCSSIYKGVRRRPWGKYIAEIRDPVKGTRLWLGTFDTEEMAAAAYRKKELEFETMMVSQVVSEESNASSVLFSRPSPSSVLDNGVESSIKQETNMEYNDYGDCYSQFSNDFGQFFGGVNDTEYFSVPDCEGLVDFPLSGMIDLPNIELENLDLLEKALNFT	ATGCCAGGACTCAAAAACCCAATGTTGGATCAAAATTTAAGTAAAATCAAACAAAACAATTTCATTTCAACAAGAAAAGTTCGCATTATATATCATGACCCTGAAGCCACAGATTCATCAAGTGATGAAGATGAAGAACTCATTAATGGAAGCAGCAAGCGATTATTTGGCAATGGTAAGCGTTTTGTAAGAGAGATTACTCTTTCAACTATGCAATATGAAACAAGAATTGAGAATTCTTGCAAAACCAAAACCAAAAGTAATGTTTATACTAGCACCAAGTTGGGTGACAAGAGAACTCGAATGTGTTCATCTATTTATAAAGGAGTTCGACGAAGGCCATGGGGGAAATATATAGCGGAAATTAGAGATCCAGTTAAAGGGACTAGATTATGGCTT…
66	ERF	VII	Jcr4S00420.40	JcERFVII-1	Jcr4S00420	11376	14095	3	2	Jcr4S00420.40	MCGGAIISDFIPPAVAGRSSRRLTADFLWPDLKKPIGKQYSKPVVDLDNDFEADFQEFKDESDADEEDDVMLDVKPFAFSATASPPARNRSSSRGSAAVKSVEFNGQAEKSAKRKRKNQYRGIRQRPWGKWAAEIRDPRKGVRVWLGTFNTAEEAARAYDAEARRIRGKKAKVNFPEEAPHASPKRPSKANSQKSLGKTNLAENLNYLDNPEQDYFNSMGFVEEKPPVSQFGIMDSLPVNGDAVSRLAKTPEISSVLSATPEIDESLFIEDANPKKKLKSDSGNEAPAEENNGKSLSDELLAFENQMNYQMPYLEGSWEASLDSFLNGDTTQDGGNPMDLWSFDDLAGMVGGVY	ATGTGTGGCGGTGCTATCATCTCCGACTTTATACCTCCCGCGGTCGCTGGGCGATCTTCTCGGCGGTTGACAGCTGATTTTCTTTGGCCTGATCTAAAGAAACCCATTGGAAAGCAGTACTCAAAACCTGTTGTTGATCTTGACAATGATTTCGAGGCTGATTTTCAGGAGTTCAAAGATGAATCTGATGCCGATGAGGAAGATGATGTCATGCTTGATGTCAAGCCTTTTGCTTTTTCTGCTACTGCCTCTCCTCCTGCTCGCAATCGCTCTTCCTCTCGTGGATCTGCAGCTGTCAAATCTGTGGAATTCAATGGGCAGGCAGAAAAATCTGCAAAAAGAAAGAGAAAGAACCAGTATAGAGGAATCCGGCAGCGCCCATGGGGAAAATGGGCTGCT…
67	ERF	VII	Jcr4S00982.160	JcERFVII-2	Jcr4S00982	63689	64547	2	1	Jcr4S00982.160	MCGGAIISDFVAVKRSRRLNAEDLWSELDTFSDFLGLDYPNNGNKEVLPSHFDLELPQKPNQLNEVEKITEKASHSQGDVKEGNKTKRTRKNIYRGIRRRPWGKWAAEIRDPHKGVRVWLGTYNTAEEAARAYDEAAKRIRGEKAKLNFGQSPPLAPALVPPYKKRCLINPGMATASYQMTAPPPEPYASLGYQKEMASDYKLKEQISSLEMFLGLEPEEMAAQLSCEGFNSVDLWMLGDLVSHHQNHGLLPY	ATGTGCGGAGGTGCTATTATTTCAGATTTCGTCGCCGTGAAACGTAGCCGGCGATTGAACGCCGAGGATCTCTGGTCTGAGCTTGACACTTTCTCTGACTTTCTTGGCTTGGATTATCCTAATAATGGCAATAAAGAAGTCCTGCCTTCCCACTTTGATCTTGAACTCCCTCAAAAGCCGAACCAGCTCAACGAAGTGGAGAAGATAACAGAGAAGGCAAGTCATAGTCAAGGCGATGTAAAGGAAGGGAACAAGACCAAGAGAACTCGAAAGAATATTTACAGGGGAATAAGGCGAAGGCCATGGGGAAAATGGGCGGCTGAAATCAGAGACCCGCACAAGGGCGTACGTGTTTGGCTTGGTACTTACAACACAGCTGAAGAAGCCGCTCGAGCCTAC…
68	ERF	VII	Jcr4S01651.60	JcERFVII-3	Jcr4S01651	29439	30474	2	1	Jcr4S01651.60	MCGGAIIADLIPRNRGRGVSSSDLWPESAFSKLNPFQSYPSSFGNHDSFTLKRSQPASGDRQVEKTPKKRQRKNLYRGIRQRPWGKWAAEIRDPRKGVRVWLGTFNTAEEAARAYDREARKIRGKKAKVNFPNEDDSYTISQNHLNGHNHRNNPPFYQPLTCNFNNTPKSYDFGFGYDLNHIGSYNSNGMNTEPVIVSGEEISGSGSEEEAYSLIGNNYMGEVKVKQEEEKMEVEKVKNREVVIVDLESEQQESELQKLSEELMAYENYMKFYQIPYLDGQSTAPNTAPQESVVGNLWNFDDDSVAAPVTSSAL	ATGTGTGGCGGTGCTATTATAGCTGATCTCATCCCTCGCAACCGTGGCCGTGGCGTCTCCTCTTCTGACCTCTGGCCTGAATCCGCCTTCTCTAAACTCAATCCCTTCCAGTCTTATCCGAGCTCATTCGGCAACCATGATTCGTTCACTCTTAAAAGATCCCAACCTGCTTCAGGTGATAGGCAAGTAGAGAAGACACCTAAAAAAAGGCAAAGGAAGAACTTGTACAGAGGTATAAGACAACGACCCTGGGGCAAATGGGCAGCTGAAATTCGTGATCCAAGAAAGGGAGTCCGTGTTTGGCTTGGGACTTTCAACACTGCCGAAGAAGCTGCGAGAGCTTACGATAGAGAAGCGCGTAAAATTCGAGGCAAGAAAGCCAAAGTCAATTTCCCTAAT…
69	ERF	VIII	Jcr4S00008.40	JcERFVIII-1	Jcr4S00008	17527	18723	1	0	Jcr4S00008.40	MEEALRRLNGMTHVQETFSHEPIITDNHKKTINGAPAATTTTTNKRALKESSGGTSGTMRYRGVRRRPWGRYAAEIRDPQSKERRWLGTFDTAEEAACAYDCAARAMRGLKARTNFVYPTTDPHCTTDPFLPPFNFSSKQSQHAIARDLPSRHHNANSSSNWPSFANSPVTDFSTGSIIQPRSNNASFNMFFRDFLNPSFNHHNQSLYDNQLTYVNGSSSNSATTAFSNGSLVNFSDSSFAGSSSLPVVENKDNNDNNSCGTDYMEFFPQEPSDSGLLQEIIQGFFPKSSSSTDKVDSAAKNSMNCSAKSMVAPLSENHRMENSHLVKNEQLGLYFENFHGGQAHFENFNGVNNSHMVPYSNGLMPENLHQMGPESILDDIFQYPDLMKAFAARIQNA	ATGGAGGAAGCCCTTAGGAGACTCAATGGAATGACCCATGTCCAAGAAACCTTTTCACATGAACCCATCATCACCGACAACCACAAAAAGACTATAAATGGTGCACCCGCCGCTACAACCACCACTACGAACAAAAGAGCACTAAAAGAAAGCAGCGGTGGAACTAGTGGGACCATGAGGTACCGTGGTGTACGTCGGAGACCATGGGGTCGTTATGCGGCGGAGATAAGGGACCCACAGTCGAAAGAAAGACGGTGGCTTGGTACTTTTGACACGGCGGAGGAGGCTGCTTGTGCTTATGACTGTGCAGCTCGAGCCATGCGTGGTTTAAAAGCTCGAACTAATTTTGTTTACCCTACTACGGATCCTCATTGTACAACAGACCCATTTCTCCCCCCA…
70	ERF	VIII	Jcr4S00126.30	JcERFVIII-2	Jcr4S00126	9995	10717	1	0	Jcr4S00126.30	MAPREKTAAVKPNGSCGGGAAAVKEVHFRGVRKRPWGRYAAEIRDPGKKSRVWLGTFDTAEEAARAYDAAAREFRGAKAKTNFPLASENVNKNIILNKKIDTGANNPSPSPSSTVESSSRETPAMMMESSSPLDLNLGPSAAVRFPFQPIPAVGGVFTPPVVNHQHVLYFDAMMKSQYQRLFFDQQHHLHHQAIFSAVNGGGVQSDSDSSSVIDLNQQEINPPRRNLDFDLNLPPKPEIA	ATGGCGCCGAGAGAGAAGACGGCGGCCGTTAAACCTAACGGTAGCTGCGGCGGCGGTGCTGCTGCTGTTAAGGAGGTGCATTTTAGGGGGGTGAGGAAGAGGCCGTGGGGTAGATATGCCGCCGAGATCAGAGATCCTGGCAAAAAGAGCCGAGTCTGGCTCGGCACCTTTGACACGGCAGAGGAAGCTGCTCGTGCTTATGACGCCGCCGCTCGTGAATTCCGGGGCGCTAAAGCCAAGACTAATTTCCCGTTGGCCAGCGAAAATGTGAACAAGAATATTATTTTAAACAAGAAGATTGATACCGGAGCAAACAATCCGAGCCCGAGCCCCAGTAGCACCGTGGAGTCGTCGAGCCGGGAGACACCTGCTATGATGATGGAATCCTCATCTCCCTTA…
71	ERF	VIII	Jcr4S00148.70	JcERFVIII-3	Jcr4S00148	30860	31486	1	0	Jcr4S00148.70	MAPKEKSNAATDLKKSSGYNDKKEMHYRGVRKRPWGRYAAEIRDPGKKSRVWLGTFDTAEEAARAYDKAAREFRGSKAKTNFPPPSEITPINTKVVNYTDNQSPSQSSTVESSSPPAARELSRDLMERFPFVYQQQKAVGTIWFLDGNIRPEFVTHRFPVRFEPVGVEFNDGLMSGGTQSDSDSSSVVDGKPARDFDLNLLPSEEEEA	ATGGCTCCCAAAGAGAAGAGCAACGCTGCCACTGATCTCAAGAAAAGTAGCGGCTATAATGATAAGAAGGAGATGCATTACAGAGGAGTCAGAAAGAGGCCGTGGGGTCGTTACGCTGCCGAGATACGGGATCCGGGAAAGAAGAGCCGGGTCTGGTTAGGCACTTTTGACACGGCTGAAGAAGCAGCAAGAGCCTATGACAAGGCGGCGCGTGAGTTCCGCGGTTCTAAGGCCAAGACTAACTTTCCCCCTCCAAGCGAAATAACACCAATTAACACCAAGGTCGTTAACTATACTGATAACCAGAGTCCTAGCCAGAGTAGCACAGTTGAGTCCTCGAGTCCACCGGCAGCGCGTGAGCTCTCACGCGATCTTATGGAAAGGTTTCCGTTTGTTTAT…
72	ERF	VIII	Jcr4S00344.40	JcERFVIII-4	Jcr4S00344	25124	25852	1	0	Jcr4S00344.40	MRRGRAAVTSAAAADAKQAVETNGSAPQKILNGREPRYRGVRKRPWGRFAAEIRDPWKKTRVWLGTFDSAEDAARAYDKAARTLRGPKAKTNFPISTSNLSPFTYQNPPDPFMDHRIYSSNAFQEHHVNPQRPTSSSLSSTVESFSGPRPPTTVLPPISTTKSGVLLATVTRGHKRHHPRTPPVVPEDCHSDCDSSSSVVDDGDIASSSSLYRKPLPFDLNFPPLDQVDFAGDDLQCTALCL	ATGAGGAGAGGAAGAGCCGCCGTGACATCCGCTGCGGCTGCAGATGCTAAACAAGCCGTGGAAACCAACGGATCTGCACCACAAAAAATCCTAAACGGAAGAGAACCGAGATATAGAGGAGTTCGTAAAAGACCATGGGGCAGATTTGCTGCGGAGATTAGAGATCCATGGAAGAAGACGAGAGTTTGGCTTGGTACTTTTGATTCTGCAGAAGACGCTGCACGTGCTTACGACAAGGCGGCTCGTACGCTTCGTGGACCGAAAGCTAAAACCAATTTTCCTATCTCTACTTCTAATTTATCTCCTTTCACCTATCAAAACCCGCCCGACCCGTTCATGGATCACCGGATTTATTCATCAAATGCATTTCAAGAGCATCATGTAAATCCTCAAAGACCT…
73	ERF	VIII	Jcr4S00344.50	JcERFVIII-5	Jcr4S00344	28042	28749	1	0	Jcr4S00344.50	MRRGRVATAAASAAKQVVEPNGSVPQNSIKGKEPRYRGVRKRPWGRFAAEIRDPWKKTRVWLGTFDSAEDAARAYDAAARSLRGSKAKTNFPFSTSQLSPFTYQNPSDTLIDHRLYTSNGFQEHHVNPQRPTSSSQSSTVESFSGPRPPVPATTTKKSGLLLTTTAPRKYHRKTPPVVPEDCHSDCDSSSSVADNGDIASSSSLCRKPLPFDLNFPPLDQVDFPIDDLQCTALCL	ATGAGGAGAGGAAGAGTAGCCACCGCTGCCGCCTCCGCAGCTAAACAAGTGGTGGAGCCAAATGGATCTGTACCTCAAAATAGCATAAAGGGTAAAGAACCCAGATATAGAGGAGTTCGTAAAAGACCATGGGGTAGATTCGCCGCCGAGATCAGAGATCCCTGGAAAAAAACAAGGGTTTGGCTCGGCACCTTCGACTCCGCTGAGGATGCCGCCCGTGCCTACGACGCCGCCGCCCGGTCTCTCCGTGGGTCAAAGGCTAAAACTAATTTTCCCTTCTCTACCTCTCAATTATCTCCTTTCACCTACCAAAACCCATCCGACACGTTAATTGATCACAGGTTATATACATCAAATGGGTTTCAAGAGCATCACGTAAATCCCCAAAGACCCACATCT…
74	ERF	VIII	Jcr4S01060.30	JcERFVIII-6	Jcr4S01060	16516	17714	2	1	Jcr4S01060.30	MESKRLERKKWNXTPIPPRSATEALGNGVRKRPWGRYAAEIRDPGKKTRVWLGTFDTAEEAARAYDAAAREFRGSKAKTNFPTVTELNNAAAAAVAAGAVTVARSPSQSSTVESSSPTPPRAASPPPPLDLTLNIPSHQHHHLRHGHFPTGVIFPGGAWISLAAEAHPVFFFDAFSAQGENNNNNKNNIINNNKIHSKNINLCRLDRTVMVSSGVHSDSDSSSVVVDYDHDRSPCNKGLSLDLDLNFPPAEVA	ATGGAAAGCAAGCGCCTAGAAAGGAAGAAGTGGAATTGAACTCCAATACCGCCGAGATCCGCTACAGAGGCGTTAGGAAACGGCGTTAGGAAACGCCCTTGGGGCCGATACGCCGCCGAGATCCGAGACCCTGGCAAGAAAACTAGGGTCTGGCTTGGTACTTTTGATACTGCTGAAGAGGCGGCGCGTGCTTACGACGCTGCTGCTCGTGAATTTCGTGGCTCTAAGGCTAAGACGAATTTTCCTACAGTTACGGAGCTGAACAACGCGGCTGCAGCCGCCGTTGCCGCGGGAGCAGTCACCGTCGCACGAAGTCCTAGCCAAAGTAGCACCGTTGAGTCTTCATCACCTACACCTCCACGCGCTGCTTCTCCTCCACCGCCTCTTGACCTTACTCTC…
75	ERF	VIII	Jcr4S01431.30	JcERFVIII-7	Jcr4S01431	9985	10476	1	0	Jcr4S01431.30	MASSREGHYRGVRKRPWGRYAAEIRDPWKKTRVWLGTFDTPEEAALAYDGAARSLRGAKAKTNFPAPATALSLDLNAPSDSHHRWSSTASHRFALGEFLQTGVFKEISFHGESSGSVKNESAVAGGGGSSVTPLPENGGQPSFLGIVRRGLPIDLNEPPPLWL	ATGGCGTCTTCAAGGGAAGGTCACTACAGGGGAGTGAGGAAGAGGCCTTGGGGTCGCTACGCAGCTGAAATACGTGACCCCTGGAAGAAAACTAGGGTTTGGTTGGGTACATTTGACACACCAGAAGAAGCTGCTCTAGCTTACGACGGTGCAGCTCGTTCTCTTCGTGGAGCTAAAGCCAAGACCAACTTTCCAGCTCCGGCCACTGCTCTTTCCCTAGACCTCAACGCACCATCGGATTCTCACCACCGTTGGAGCTCAACCGCCTCTCACCGCTTCGCTCTCGGTGAGTTCCTACAAACTGGGGTTTTCAAAGAGATTAGCTTTCATGGAGAGAGTTCAGGCTCGGTGAAAAATGAGAGTGCGGTTGCCGGTGGTGGTGGTAGTTCTGTCACTCCA…
76	ERF	VIII	Jcr4S02357.40	JcERFVIII-8	Jcr4S02357	15173	16009	1	0	Jcr4S02357.40	MDLTTSSVPSPSKTKRKQQHHQQQQPDDQQVRFLGVRRRPWGRYAAEIRDPSTKERHWLGTFDTAEEAALAYDRAARSMRGYKARTNFVYSDMPPGSSVTSIISPDESQHDISALFAPSRHYNNNSNNNNNNNDQNQLLFGQDCTFSASFPYGNHCGLVAAAAGDGWVVQEGGYFEPIIASTEAVAAGGSKSNNFCFSGDNIELPPLPPDVTSSSCYGSDMGHGFWDETAFFGLSEEQINGPQLSASGSYLGFDSSLSVTDTVTDGLDLGSSSSAFFF	ATGGATTTGACCACCTCATCCGTACCCTCCCCCTCAAAAACTAAAAGAAAGCAGCAGCACCACCAGCAGCAGCAACCTGACGATCAACAAGTGAGATTCTTGGGAGTGAGAAGACGACCATGGGGTCGATATGCGGCAGAGATTAGAGACCCTTCTACCAAAGAGAGGCATTGGCTAGGCACTTTTGACACCGCTGAGGAGGCCGCCTTGGCCTACGACCGTGCAGCTCGTTCCATGCGCGGCTACAAGGCTCGCACCAACTTTGTGTATTCTGATATGCCACCTGGCTCCTCTGTCACTTCCATTATCTCTCCTGACGAATCACAACACGACATCTCTGCACTTTTCGCTCCTTCCCGCCACTATAATAATAATAGTAATAATAATAATAATAACAAT…
77	ERF	VIII	Jcr4S02864.30	JcERFVIII-9	Jcr4S02864	8813	9880	1	0	Jcr4S02864.30	MSTSKTLDKPLYEQVKVHGGFALIQRNTSPTQSGERRGRSRKQAEPGRFLGVRRRPWGRYAAEIRDPTTKERHWLGTFDTAQEAALAYDRAALNMKGTQARTNFVYADNGTFHSLLTPFDVQAFLPPSQFLSGIQSNYKQQPVNNDSPPKLETCQNFQIPNNQISTSDNQISTDQSTYDTSFFFSKDDTNSGYLGCIVPDNCLRPPPPSNNPTSATNSITYKFKAPNDQNFGSIQNQLHCNNNSYAFPINTTSAPTKALNPENFPCFEELNNGFWGDQQSWEFNSNELSAIINNPLMAGDVCMEALYPSTNNHTSYIGSVMPQASTSSSSSSSSVSCTPSFPPYGDTIEFGYSLY	ATGTCTACCTCCAAAACCTTAGATAAACCCTTATATGAACAAGTTAAAGTACATGGTGGGTTTGCTCTTATTCAAAGAAACACATCTCCAACTCAAAGTGGAGAAAGAAGAGGCAGATCGAGAAAGCAAGCAGAGCCTGGTAGGTTTCTTGGAGTTAGAAGAAGACCTTGGGGTAGATATGCTGCAGAAATTAGAGACCCGACGACTAAAGAAAGGCATTGGCTTGGAACTTTCGATACAGCTCAAGAAGCAGCTCTTGCTTATGATAGGGCTGCTCTTAATATGAAAGGCACTCAAGCAAGAACTAACTTTGTTTACGCTGATAATGGTACTTTTCACTCTCTTCTTACTCCATTTGATGTTCAAGCTTTCTTGCCACCATCACAGTTTCTCAGTGGC…
78	ERF	VIII	Jcr4S04674.30	JcERFVIII-10	Jcr4S04674	7916	8800	1	0	Jcr4S04674.30	MNNQNLLPVPFFSNPETYQLSEKVHFLTETSSFYKPLFAPHYPISSILAHNNYLNQHNCCPVSVDVSVSDSFVPSKKEPDTQTQSLPVLDGIAAVVGQHILFGTNTSANGKNLETSISQRTGSKTTNHEDDGHRKVTGMPMQRSYRGVRKRPWGRWSAEIRDRIGRCRHWLGTFDTAEEAARAYDAAARRLRGAKARTNFEIPSVLPISSPTSSGSSTEVRKRNSNKGNGGKKCAVVTSVAHLFSDIINTNSVFEGKTNSTVSNNNNAKLELDLKLGMGFGENGNKRDAPYMVI	ATGAACAACCAAAACTTGCTCCCCGTTCCGTTCTTTTCCAACCCTGAAACTTATCAGTTATCCGAAAAGGTTCATTTCTTGACTGAAACGTCGTCTTTTTATAAGCCTCTGTTTGCTCCCCATTACCCCATCTCTTCCATTTTAGCTCATAATAACTACCTTAACCAACATAACTGCTGTCCTGTATCGGTCGATGTCTCGGTTTCAGATTCCTTTGTTCCTAGCAAGAAAGAACCCGATACCCAAACTCAATCGCTGCCCGTTCTTGATGGAATCGCTGCTGTTGTTGGCCAGCACATCCTTTTTGGAACCAATACCTCCGCCAATGGTAAGAACCTCGAAACATCAATTTCACAACGGACCGGCTCAAAGACAACGAACCACGAGGATGATGGTCAC…
79	ERF	VIII	Jcr4S05837.30	JcERFVIII-11	Jcr4S05837	5618	6253	1	0	Jcr4S05837.30	MAPKEKSIAASTGLKKGTITNNNDKKEMHYRGVRKRPWGRYAAEIRDPGKKSRVWLGTFDTAEEAATAYDKAAREFRGPKAKTNFPLPTEITPIKTKVANCTDDPSPSQSSTVESSSPPAAREITHDLVERFPFVYQQQNVVGPVWFFDGSIRPEFMTRQFPVRFEPVGLAFNGGLVSGGSQSDSDSSSVVDGKPARDFDLNLLPSEEEDA	ATGGCTCCCAAAGAGAAGAGCATCGCCGCCTCCACTGGCCTCAAGAAAGGTACCATTACCAACAATAACGATAAGAAGGAAATGCATTACAGAGGAGTTAGAAAGAGGCCTTGGGGTCGTTACGCCGCCGAGATACGGGATCCGGGGAAGAAGAGCCGGGTCTGGTTAGGCACTTTTGATACGGCTGAGGAAGCTGCTACAGCTTATGACAAGGCGGCGCGTGAATTCCGTGGCCCTAAGGCCAAGACTAACTTTCCTCTTCCCACCGAAATCACTCCGATTAAAACCAAGGTCGCTAACTGCACTGATGACCCAAGTCCTAGCCAGAGCAGCACGGTTGAATCCTCCAGTCCGCCGGCTGCGCGTGAGATCACACACGACCTTGTGGAAAGGTTTCCG…
80	ERF	VIII	Jcr4S11123.10	JcERFVIII-12	Jcr4S11123	2202	2978	1	0	Jcr4S11123.10	MNPSPSKSKKKQATPQQQEPAAQGGRFLGVRRRPWGRYAAEIRDPTTKERHWLGTFDTAEEAALAYDRAARNMRGSRARTNFVYSDMPAGSSVTSIISPDEQQQIHSLHQQQQQQQLEHYNASMFVPPAQSNQPDPLSFHDFSSVSQCHFSNDFSSMIGPDTWSCSSSTYQEPVITNDELPPLPCDLSSNFSSSVGSGLMGFEEQTTLTNGFESVSGSGSYFGFDSGEYVHSPLFSRMPPVSETVPEGFDLGSSTYFF	ATGAATCCATCTCCATCAAAGAGCAAGAAGAAACAAGCAACGCCGCAACAACAAGAACCGGCAGCACAAGGTGGTAGGTTTCTCGGTGTTCGGAGAAGGCCGTGGGGAAGGTACGCAGCGGAGATAAGAGACCCAACCACAAAAGAAAGACATTGGTTAGGGACATTCGACACGGCGGAGGAAGCTGCCTTGGCTTATGACAGAGCTGCCCGTAACATGCGTGGCTCACGTGCTCGTACTAACTTTGTTTACTCTGATATGCCTGCCGGTTCTTCTGTAACCTCCATTATTTCTCCTGATGAACAACAACAAATTCACTCTCTTCATCAACAACAACAACAGCAACAGTTAGAACATTATAATGCTTCAATGTTTGTTCCTCCAGCTCAGTCAAATCAA…
81	ERF	IX	Jcr4S00154.110	JcERFIX-1	Jcr4S00154	64235	64879	1	0	Jcr4S00154.110	MDSSFFSYQTYSQFSPESSSSFSSLESFCSQPLPYNENDSEEMFLFGVLNEAPTFSANMNYSEVNSADSNNYQDEPIQEIAYRGVRKRPWGKYAAEIRDSTRNGVRVWLGTFDKAEDAALAYDQAALAMRGSTAILNFPIEKVYESLQEMKYEFQEGYSPVLELKKRHSMKRKAESKKKKGKEDMRMENVVVLEDLGAEYLEELLTISENATSW	ATGGATTCCTCTTTCTTCTCATACCAAACCTACTCTCAATTTTCCCCTGAATCATCTTCTTCTTTTAGTTCTCTCGAATCTTTCTGCAGCCAACCTCTTCCGTACAATGAAAATGACTCCGAAGAAATGTTTCTGTTCGGCGTCCTTAATGAGGCACCCACCTTCTCTGCTAATATGAACTACAGCGAGGTTAACTCAGCAGACTCTAATAATTATCAAGACGAACCTATTCAAGAAATTGCTTATCGAGGAGTAAGAAAGCGGCCTTGGGGGAAATATGCGGCGGAAATCAGAGATTCGACGAGAAATGGAGTTAGAGTTTGGTTAGGAACATTTGATAAAGCTGAGGATGCAGCCTTAGCTTATGATCAAGCTGCATTAGCAATGAGAGGTTCAACG…
82	ERF	IX	Jcr4S01276.100	JcERFIX-2	Jcr4S01276	30234	30998	1	0	Jcr4S01276.100	MNEAIISDSNLSHCSTPTSTYSSLFPCLTDNWGDLPLKVDDSEDMVIYNFLSDAVCSGWSPLDFTSSPASATPTTAVKTEPTDEVEPASFVQEAASNIALLESTPILENRSQGTDLLKKQNQKVSKGRHYRGVRQRPWGKFAAEIRDPAKNGARVWLGTYETAEEAALAYDRAAFRMRGSRALLNFPHKIGSNEPEPVRITSKRSETEIAASAKRRKIMAGDEANELEPEREEKRHNVVFHVGPMPVGEQLLVN	ATGAATGAAGCCATCATATCCGATTCTAATTTGTCCCATTGCTCTACTCCCACTTCAACTTATAGCAGTCTCTTTCCTTGCTTAACGGACAACTGGGGCGACTTGCCGTTAAAAGTCGACGACTCTGAAGATATGGTCATATACAACTTCCTCAGCGATGCCGTTTGTTCCGGTTGGTCTCCGTTAGATTTTACGTCCTCCCCTGCCTCTGCAACACCCACGACTGCTGTTAAAACTGAACCGACGGATGAGGTGGAGCCGGCTAGCTTCGTTCAAGAAGCTGCTTCAAATATAGCATTACTTGAGAGTACTCCTATTCTCGAAAATAGAAGCCAGGGTACTGATTTATTAAAAAAGCAAAATCAGAAGGTTTCCAAAGGAAGGCATTACAGAGGAGTA…
83	ERF	IX	Jcr4S01276.110	JcERFIX-3	Jcr4S01276	35653	36477	1	0	Jcr4S01276.110	MASPNEASALDQIRQHLLSTDCASFDSFISTSNNFFLKSEIQDFDYLLPNQTLNLEFKSQQVVQNSNNSPKSSTLSQRKPAMSKISIPPPATMNVMPVPVVAVAAENNRSSDHSSEEKHYRGVRRRPWGKYAAEIRDPNKKGARVWLGTFDTAIEAAKAYDNAAFRLRGSKAILNFPLEVGNCNSNPQRESQLTENNNNNNKKRKIEDAKSEGSNDNIKMVKRENPSPAAATDPLTPSSWKGFWDGEVTGIFSVPPLSPLSPHPTMGYSQLMVV	ATGGCGTCTCCCAATGAAGCTTCAGCTTTAGATCAAATTAGGCAACATCTCCTCAGTACTGACTGTGCTTCCTTTGATAGTTTCATCTCCACTAGTAATAATTTCTTTCTCAAATCTGAAATTCAAGATTTTGATTACTTGCTACCAAATCAAACTCTCAACTTGGAATTCAAGTCCCAGCAGGTAGTTCAAAATTCCAACAATTCCCCCAAATCTTCCACTTTGAGTCAGAGGAAACCCGCTATGAGTAAAATATCGATTCCTCCTCCGGCAACTATGAACGTGATGCCAGTACCAGTGGTGGCAGTAGCTGCTGAAAATAACAGGTCTTCTGATCATTCTAGTGAAGAAAAGCATTACAGAGGAGTTCGGCGTAGGCCATGGGGAAAATACGCAGCG…
84	ERF	IX	Jcr4S01276.120	JcERFIX-4	Jcr4S01276	38592	39263	1	0	Jcr4S01276.120	MATPQESSALELIRQHLLGDFTSTDVFISNLDSHISSLVHNLQPVKLETQDESLSGSESNSSVSDSFQYTHEFVDLKSQEYSGSGSVKRSSTPKAKPADDDEKKHYRGVRRRPWGKFAAEIRDPSRKGSRVWLGTFDTDIDAAKAYDCAAFRMRGRKAILNFPLEAGRADPPANTGRKRRRVKREDVPPESGDLSPVSWDSGCVGGEGEGVFFYEEQPSPLFC	ATGGCAACTCCCCAAGAATCCTCTGCTCTTGAGCTTATTAGACAACATCTTCTTGGAGACTTCACTTCTACTGATGTCTTTATTAGTAATCTTGATTCTCATATTTCTTCTCTTGTCCACAATCTCCAACCCGTTAAACTTGAAACCCAAGATGAATCTTTATCTGGGTCTGAATCCAACTCCTCTGTTTCCGACTCGTTTCAATATACCCACGAATTTGTTGACTTAAAATCTCAAGAGTATTCAGGTTCTGGTTCGGTAAAGCGGTCTTCGACACCTAAAGCCAAACCGGCTGATGATGATGAGAAGAAGCATTATAGAGGGGTACGGAGAAGGCCTTGGGGCAAGTTTGCAGCGGAGATCCGTGACCCGAGCAGGAAGGGCAGTCGGGTTTGGTTA…
85	ERF	IX	Jcr4S02219.50	JcERFIX-5	Jcr4S02219	20157	21319	2	1	Jcr4S02219.50	MHSLASPIMQPLALPASLTQSSRSFLQPVQADSGAFAVEKKRHYGGVRQRPWSKYAAEIRDPNRKGRRLWLGTFDEAAKAYDQAAFKFCGSKAILNFTLKARKWNTRSSEASEQKGTGESEIVEEEAKKAVRERSLREMWRCRRRAGRLSWTGRVALGLGILGEKKLGAQNGEYGRFDTLGLG	ATGCACTCACTTGCATCGCCTATTATGCAGCCTCTCGCCTTGCCGGCGTCTCTTACTCAATCTTCTCGCTCTTTTTTACAACCGGTCCAAGCTGACTCGGGTGCTTTTGCTGTAGAAAAGAAAAGGCATTACGGAGGAGTCCGACAGAGACCGTGGAGCAAATACGCAGCGGAGATCCGAGACCCGAATCGGAAAGGCCGTCGATTGTGGCTCGGCACATTCGACGAAGCCGCCAAAGCCTACGATCAAGCAGCGTTCAAGTTTTGCGGCTCAAAAGCCATTCTGAACTTCACTCTAAAAGCTAGGAAATGGAACACACGTTCCAGTGAAGCAAGCGAACAGAAAGGAACAGGAGAAAGTGAGATTGTAGAAGAGGAAGCGAAGAAGGCGGTGAGAGAG…
86	ERF	IX	Jcr4S03023.30	JcERFIX-6	Jcr4S03023	9960	10379	1	0	Jcr4S03023.30	MDEDKSTKSNKEERSDGEVKYRGVRRRPWGKFAAEIRDSTRHGARVWLGTFKTAEEAARAYDRAAYAMRGQFAILNFPNEYPLTSTAGAGASSSSSSSAPPPPPPSSSAMTRQVFEIEYLDDKLLEEMLETEEQKNKKK	ATGGATGAGGATAAGAGCACAAAGAGCAATAAGGAAGAAAGAAGCGACGGTGAAGTCAAATACAGAGGCGTTCGAAGGCGGCCGTGGGGTAAATTTGCGGCGGAGATACGCGACTCCACCAGACATGGAGCGCGGGTTTGGCTTGGAACTTTTAAAACGGCAGAGGAAGCAGCAAGAGCTTATGACCGAGCCGCTTATGCAATGAGAGGGCAGTTTGCGATTCTTAACTTCCCTAATGAGTATCCTCTTACAAGCACAGCTGGTGCTGGCGCTTCTTCTTCTTCATCTTCTTCTGCTCCTCCTCCTCCTCCTCCTTCTTCTTCAGCAATGACAAGGCAAGTTTTTGAGATAGAGTATTTGGATGATAAGTTACTGGAAGAGATGCTTGAGACAGAAGAG…
87	ERF	IX	Jcr4S03023.40	JcERFIX-7	Jcr4S03023	12418	12879	1	0	Jcr4S03023.40	MEGSSSKGTKNKEDKGREEVHYRGVRRRPWGKYASEIRDPSRQGARLWLGTFDTAEEAARAYDRAAFSMRGHLAILNFPNEYYSRVIASSSSPHQSSSPSSSFSGAMEMSSERGSSSSSGQEKQVFEFEYLDDTVLEELLESEEEKKKKRRED	ATGGAAGGCAGTAGCAGCAAAGGGACCAAGAACAAAGAAGATAAAGGAAGAGAAGAAGTGCATTACCGAGGGGTAAGAAGGCGGCCGTGGGGGAAATATGCGTCGGAGATTCGAGACCCATCAAGGCAGGGGGCTAGGTTGTGGCTAGGAACATTTGACACCGCAGAGGAGGCGGCGCGTGCTTATGATAGAGCTGCATTTAGCATGAGAGGTCATCTTGCAATCCTTAATTTTCCTAATGAATATTATTCTCGAGTAATTGCTTCATCGTCTTCTCCTCATCAGTCGTCATCTCCTTCCTCTTCATTTAGTGGTGCAATGGAGATGAGTTCTGAGAGAGGAAGCTCCAGTTCGAGTGGGCAAGAGAAGCAAGTGTTTGAGTTCGAGTATTTAGATGAT…
88	ERF	IX	Jcr4S03023.50	JcERFIX-8	Jcr4S03023	22492	23151	1	0	Jcr4S03023.50	MDSSNFYSPNSDFSSESSFGSPESFYSPSFNQDSLPFNENDSEEMLLYGLISEATQETSKMDYSNKKIKEEEVSSIIKQNTKKESKSFRGVRRRPWGKFAAEIRDSTRHGIRVWLGTFDSAEAAALAYDQAAFSMRGAGAVLNFPVERVKESLEDMKYSHEEDGCSPVVALKRKHTMRRKIMSRAKKENVVVLEDLGPDYLEQLLSSSENATPWSTKFI	ATGGATTCCTCAAATTTTTACTCTCCCAATTCTGATTTCTCATCGGAATCTTCTTTCGGATCGCCGGAATCCTTCTATAGCCCATCGTTTAACCAAGATTCTCTCCCTTTCAATGAAAATGATTCCGAAGAAATGCTTTTGTATGGACTAATTTCAGAGGCAACGCAAGAAACGTCAAAAATGGATTATTCGAACAAAAAAATCAAAGAAGAGGAGGTGAGTTCAATAATAAAACAAAACACAAAGAAGGAAAGCAAATCCTTCAGAGGTGTAAGGAGGCGGCCATGGGGAAAATTCGCGGCGGAGATAAGAGATTCAACTAGGCATGGAATAAGAGTATGGTTAGGGACATTTGATAGCGCAGAGGCAGCTGCTTTAGCTTACGATCAAGCTGCTTTT…
89	ERF	IX	Jcr4S05283.30	JcERFIX-9	Jcr4S05283	7938	8378	1	0	Jcr4S05283.30	MEEKGNEGGSDVRYRGVRRRPWGKFAAEIRDSMRQGTRIWLGTFNTAEEAARAYDKAAYAMRGHLAILNFPDEHPPKKVHSAASSSYSSSSSSSASSSSSSSSSSSSILQNVERREIEQGKQVIEFECLDDKLLEDLLDFDDQNKD	ATGGAGGAAAAGGGTAATGAAGGAGGATCAGATGTTCGATATAGAGGAGTAAGAAGGCGGCCATGGGGGAAATTTGCAGCAGAGATTCGAGACTCGATGAGGCAAGGTACTAGAATATGGTTAGGGACTTTTAATACAGCTGAAGAAGCTGCAAGAGCTTATGATAAAGCTGCATATGCAATGCGAGGTCATTTAGCTATATTAAATTTCCCCGACGAACACCCTCCAAAAAAGGTTCATTCTGCTGCCTCTTCTTCTTATTCTTCCTCCTCTTCTTCTTCTGCTTCTTCTTCATCTTCTTCTTCTTCTTCTTCCTCCTCAATTTTACAGAATGTGGAAAGAAGAGAGATTGAGCAAGGGAAACAAGTGATTGAATTTGAGTGCTTGGATGACAAGTTG…
90	ERF	IX	Jcr4S05283.40	JcERFIX-10	Jcr4S05283	9432	9887	1	0	Jcr4S05283.40	MEATDQVGNNKNSKKQDRGSAETRYRGIRRRPWGKFAAEIRDPTRNGARRWLGTFETAEEAARAYDRAAFAFRGHLAILNFPNEYQYNSHSSPLPSFASSSSSSSSSAPPANYGVVGSSGGQEVIEFEYLDNKLLEDLLETKEVSNNKAHW	ATGGAAGCAACTGATCAAGTAGGGAATAATAAGAACTCCAAGAAACAAGACAGAGGAAGTGCAGAAACACGGTACCGCGGAATTCGCCGGCGTCCATGGGGTAAATTTGCAGCAGAGATACGTGACCCGACAAGAAATGGTGCACGGCGGTGGCTTGGAACGTTTGAAACCGCGGAGGAAGCTGCAAGAGCATATGACAGAGCAGCTTTTGCTTTTAGAGGTCATTTAGCGATTCTTAATTTCCCTAATGAATATCAGTACAATAGCCACAGCTCACCCCTGCCGTCATTTGCTTCTTCTTCTTCTTCTTCTTCTTCTTCTGCTCCTCCTGCTAATTATGGCGTGGTGGGTTCTTCTGGAGGGCAAGAAGTTATAGAGTTTGAGTATTTGGATAATAAA…
91	ERF	IX	Jcr4S05283.50	JcERFIX-11	Jcr4S05283	18317	18859	1	0	Jcr4S05283.50	MILFNVQPETTNKESSESNSSTGATKGEEVTSKEERKEKSYRGVRKRPWGKYAAEIRDSTRNGIRVWLGTFDSAEAAALAYDQAAFSMRGSMAILNFPVEVVRESLQDIKYRFEDGCSPVIALKKKHSMRRKSTSKKSKKETNEVNTSRKQNVVVLEDLGAEYLEELLSSSCEGSPNPNW	ATGATTCTTTTCAACGTTCAACCGGAAACCACCAATAAAGAATCGTCGGAGTCAAATTCTTCGACCGGAGCCACTAAAGGAGAAGAAGTAACATCGAAAGAAGAAAGAAAAGAAAAAAGCTATAGAGGAGTAAGAAAGAGGCCATGGGGAAAGTACGCCGCCGAAATAAGAGATTCGACCAGAAATGGTATCAGAGTTTGGTTAGGAACTTTTGATAGCGCAGAGGCGGCAGCTTTAGCTTATGATCAAGCAGCATTTTCCATGCGTGGTTCGATGGCCATACTGAACTTTCCGGTGGAAGTAGTAAGAGAATCGCTTCAAGATATCAAATACCGGTTTGAAGATGGGTGTTCGCCGGTTATAGCGTTAAAGAAAAAACATTCGATGAGAAGAAAGTCA…
92	ERF	IX	Jcr4S05308.30	JcERFIX-12	Jcr4S05308	7350	8171	1	0	Jcr4S05308.30	MNTQNDHQLLENVWASFIRGEEEADKKRSETQEISKSWQELPGLDGREGSMDVLQRLPSLGRWFSMGAEAWEELLSGLDDDVSRSHDNVQLSCNFDSSDNKNLKVNAMKVDNVTQRHYRGVRRRPWGKYAAEIRDSTRKGARVWLGTFDTAEEAALAYDKAALRIRGPKAYLNFPLDTVAKAMGNGYAIDHGYKRSSDSSCTFLEGNYENNNSRTRKRVSRDWESEKSDVELIIEQPEFKRMFSVEEKIGSDFDVVEFQDLGSDYLESLLSSL	ATGAATACACAAAATGATCATCAACTTCTAGAGAATGTATGGGCGAGTTTTATCCGAGGCGAAGAAGAAGCAGACAAGAAAAGAAGTGAAACCCAAGAGATTTCAAAATCATGGCAAGAGCTACCTGGTCTTGATGGTAGAGAAGGATCAATGGATGTCCTTCAAAGACTACCAAGTCTAGGCAGGTGGTTTTCAATGGGAGCTGAGGCATGGGAAGAACTTCTTTCAGGACTAGACGACGACGTTTCAAGAAGTCACGATAATGTACAACTTTCTTGCAATTTTGATAGTTCAGATAACAAGAACTTAAAAGTCAATGCTATGAAAGTAGACAACGTGACCCAAAGACATTACAGAGGAGTAAGGAGACGACCTTGGGGTAAATATGCGGCGGAGATA…
93	ERF	IX	Jcr4S05308.40	JcERFIX-13	Jcr4S05308	10000	10536	1	0	Jcr4S05308.40	MVFTSQSELPFNENDSQDMVVYQMINESISFNTSNMLPRNQINTSNRFQLQPTKTVAKKHYRGVRRRPWGKFAAEIRDSTRHGARVWLGTFQTAEEAALAYDRAAFRMRGSKALLNFPAEVVAAAAATNNSPQKFKPNSENSGGSSNVSQSESESSTVTEESRDVGPLARTRLFGQVA	ATGGTTTTCACCTCTCAATCTGAGCTTCCATTTAATGAGAATGACTCACAAGACATGGTCGTTTACCAAATGATAAATGAATCCATTTCCTTCAATACCTCTAATATGCTACCAAGAAACCAGATTAACACATCAAACAGGTTCCAACTGCAACCAACCAAGACCGTGGCCAAGAAACACTACAGAGGCGTCAGGCGTCGGCCGTGGGGCAAATTTGCGGCGGAAATTCGCGATTCAACTCGACACGGTGCTCGTGTATGGCTAGGCACGTTCCAGACGGCGGAGGAGGCTGCTTTGGCCTATGATAGGGCGGCTTTTAGAATGCGCGGTTCCAAGGCGCTCCTTAATTTTCCAGCTGAAGTGGTGGCTGCAGCTGCTGCAACAAACAATAGTCCGCAA…
94	ERF	IX	Jcr4S05515.20	JcERFIX-14	Jcr4S05515	11387	12058	1	0	Jcr4S05515.20	MLLYGVLRDAVTVGWVPSLRTEPQPDFPPVKLEPEEIFAALPEIVPTPATVQMPERIETQAMVSVAAATTTTAPAVVPTKGKHYRGVRQRPWGKFAAEIRDPAKNGARVWLGTFETAEDAALAYDRAAYRMRGSRALLNFPLRVNSGEPDPVRVTSKRSSPEPSSSSSSGSVNGSPKRRKKVVSSGTTPSDTKTVVAQAGLEMGNAVRYQVAASTHGEHLLVN	ATGCTTCTCTACGGCGTTCTCCGCGATGCTGTTACTGTTGGTTGGGTCCCATCTCTAAGAACTGAGCCGCAGCCTGATTTTCCGCCGGTGAAATTAGAACCGGAGGAGATTTTTGCTGCTTTGCCGGAGATTGTGCCAACTCCGGCTACTGTACAGATGCCGGAGAGGATTGAGACTCAAGCTATGGTTTCTGTGGCTGCTGCTACTACTACGACGGCTCCGGCAGTGGTGCCCACGAAGGGGAAGCATTACAGAGGAGTGAGACAGCGGCCGTGGGGGAAATTCGCAGCGGAGATTCGTGACCCAGCGAAAAATGGGGCTCGGGTTTGGTTAGGGACATTTGAGACAGCGGAGGATGCGGCTTTGGCTTATGATCGCGCCGCTTATAGAATGCGTGGG…
95	ERF	IX	Jcr4S05725.10	JcERFIX-15	Jcr4S05725	1	504	1	0	Jcr4S05725.10 /partial	IQFAEPNQQSVQADSGASAVEEKRHYRGVRQRPWGKYAAEIRDPNRKGTRLWLGTFETAIEAAKAYDQAAFKFRGSKAILNFPLEAGKWNTRASEGNERKRTRESEIVEEEAKKVVKREEPQGDEALTPSSWTAIMDGGDLKGIFNVPPLSPFSPHPPLGYSQLIVS	ATCCAATTTGCTGAACCGAACCAGCAATCGGTCCAAGCTGACTCGGGTGCTTCTGCTGTAGAAGAGAAAAGGCATTACAGAGGAGTCCGACAGAGACCGTGGGGCAAATACGCAGCGGAGATCCGAGACCCGAACCGGAAAGGCACTCGGTTGTGGCTCGGAACCTTCGAAACAGCTATCGAAGCCGCCAAAGCCTACGATCAAGCAGCGTTCAAGTTTCGCGGCTCAAAAGCCATTCTGAACTTCCCTCTAGAAGCTGGGAAATGGAACACACGTGCCAGTGAAGGAAACGAACGGAAACGAACAAGAGAAAGTGAGATTGTAGAAGAGGAAGCGAAGAAGGTGGTGAAGAGAGAAGAGCCTCAGGGAGATGAGGCGTTGACGCCGTCGAGCTGGACG…
96	ERF	IX	Jcr4S05725.30	JcERFIX-16	Jcr4S05725	6881	7765	1	0	Jcr4S05725.30	MATEAQLTSALELIEQHLLGDLLSPVSSSCSSSTSSTDSSISISDYFNPNDTDDDFLQFEAKPQFIDLTTPKSFEFDSNSLFEFESKPQIPQSFGITQSNNKDFFDFDSKPQIQVNRKPSLKISLPNKTEWIQFAKSNQEPVQSNSVEEKRHYRGVRQRPWGKYAAEIRDPNRKGTRVWLGTFDTAIEAAKAYDRAAFKLRGSKAILNFPLEAGKLNTNADEGNQRKRTRESEIVEVEAKKVVKREETERDVALTPSSWTTSWDSGNLKGVFSLSPSSPLSPHPALGYAQLAVI	ATGGCGACTGAAGCTCAACTGACCTCTGCCTTAGAGCTTATCGAGCAACATTTACTCGGCGATCTTCTTTCACCTGTCAGTAGCTCATGTTCTTCTTCTACTTCAAGCACCGACTCCTCTATCTCAATCTCTGATTATTTTAACCCTAACGATACTGATGATGATTTCCTCCAATTTGAAGCTAAACCTCAATTCATTGATCTTACTACTCCTAAGAGTTTTGAATTCGATTCTAATTCTCTTTTCGAATTCGAATCAAAACCTCAAATACCTCAGAGTTTCGGAATTACTCAATCAAATAATAAAGATTTCTTTGATTTCGATTCAAAGCCTCAAATTCAAGTAAACCGAAAGCCATCTTTGAAGATCTCGCTGCCTAACAAAACTGAATGGATTCAA…
97	ERF	IX	Jcr4S07301.10	JcERFIX-17	Jcr4S07301	3124	3581	2	1	Jcr4S07301.10	MNGSFPCNQLNQFDSTALAAKEAELYDAIVSPEVVAAVTVPEQAAADKDKLDSREMQNTKGTPEDAALAYDEAAFKMRGCKAKLNFPHLIGSTDYQPPVRVSPKRRSPESTLFEDGSPKRRK	ATGAATGGGAGCTTCCCTTGCAATCAGTTAAATCAATTTGATTCCACGGCGCTCGCTGCCAAAGAGGCGGAGCTTTATGATGCTATTGTTAGTCCAGAGGTTGTTGCTGCTGTCACTGTTCCAGAACAGGCTGCAGCGGATAAGGACAAGTTAGATTCTAGGGAAATGCAAAATACAAAAGGGACACCTGAGGATGCTGCTCTCGCCTACGACGAAGCCGCTTTTAAAATGCGTGGTTGTAAAGCTAAGCTTAATTTTCCTCACCTGATCGGCTCTACTGATTACCAGCCTCCGGTTAGAGTGAGCCCTAAGCGGCGATCGCCAGAATCTACATTGTTTGAGGATGGCTCGCCTAAGCGGAGAAAATGA
98	ERF	IX	Jcr4S11523.10	JcERFIX-18	Jcr4S11523	531	5963	8	7	Jcr4S11523.10 /TE	MQVQSSSGSMLTSLLESIRNHLLADDFEDPCTATASLLSYTSEWFSSLQLNSVNELSMVVEQESPSIDVGSKAAVPVPVARPNHTPPLRRRNYIGVRRRPWGTYAAEIRDPKKNGARVWLGTYETPEDAAVAYDRAAFEMRGSKAKLNFPHLIGSDNVEPARLSHKRRVPESSSLAVKSSGSPKRRKGNKNPVEELQYGVEPLFLGDQSMVNSIVCDASISNTFTLVYLEFDMANDGAMIKLTDSNYSMWKSRMEDYLNCKDLYDPIKGDSAKPEEMKERQWDKLKKQALGKVFMIRKVMNLKLSEGRSVTQHLNDFEGLVAELAVSGMSLDDEMQACLLLGFLPDSWDTLVSYEEETSPVPVHKPLSQRIGAGARVEVTGMKSQVDNVNRRQENDRNT…	ATGCAGGTACAGAGCAGCTCGGGTTCCATGCTCACTTCTCTTCTGGAGTCGATTCGAAATCATCTCCTCGCCGATGATTTTGAAGATCCTTGTACTGCTACCGCTTCACTTCTTTCTTATACAAGTGAATGGTTTTCTTCGCTTCAGCTTAACTCCGTTAATGAGTTATCCATGGTGGTTGAACAAGAATCTCCGAGTATAGATGTAGGTAGTAAAGCGGCAGTGCCAGTGCCAGTGGCTCGTCCGAATCACACGCCTCCACTCAGGAGGAGGAATTATATTGGTGTAAGGAGAAGGCCATGGGGAACTTACGCAGCGGAGATTAGAGATCCCAAGAAGAATGGTGCCAGAGTATGGCTAGGGACTTATGAGACTCCTGAGGATGCGGCTGTGGCTTAT…
99	ERF	IX	Jcr4S11523.20	JcERFIX-19	Jcr4S11523	11450	12043	1	0	Jcr4S11523.20	MHAQSISDLVFLQPIKHQFEAPASFDHLYSSFLTENWGDLPLKLDDSEDMIVYDALRDAVNVGWSPSYESDNKAIEVVEEVVRAPKRTVPLEADRESKKNTLPQKRNAMHYRGVRRRPWGKFAAEIREPRTKNGARLWLGTYETPEEAALAYDRAAFKIRGSKAKLNFPHLVGSDERESSPSMSDNDSVTKKRKLIE	ATGCATGCACAAAGCATCTCAGACTTGGTTTTTCTCCAACCAATTAAACACCAATTCGAAGCCCCTGCCAGTTTCGATCATCTATATTCCAGCTTTTTGACGGAAAACTGGGGAGATTTGCCACTTAAACTAGACGATTCAGAGGACATGATCGTCTACGATGCTCTACGAGACGCCGTTAATGTCGGATGGTCTCCGTCGTATGAATCTGATAATAAAGCGATCGAGGTCGTTGAAGAAGTAGTGCGTGCCCCCAAAAGAACTGTTCCATTGGAAGCAGACCGCGAGAGCAAGAAGAACACGCTTCCGCAAAAGAGGAACGCAATGCATTACAGGGGAGTGAGAAGAAGGCCGTGGGGGAAATTTGCAGCGGAGATTAGAGAGCCTCGTACGAAGAAT…
100	ERF	IX	Jcr4S17456.20	JcERFIX-20	Jcr4S17456	2469	3167	1	0	Jcr4S17456.20	MWRESTSEFDDMAFLESIQQFLLNDDFQTLASIPEFNSSEESSFSSSPHSTDTCNHLPSKLVNDPYEMSICNALADNEWSFSWNPVNQFDSTALAAKEAELYDVIASPEPEVVSEPEVSIPKVAAARKNNSDCKGWQYRGVRRRPWGKYAAEIRDPKKNGARIWLGTYETPEDAALAYDQAAFKMRGSKAKLNFPHLIGSADYQPPVRVSPKRRSSEMESTSSEDGSPKRRK	ATGTGGAGGGAAAGTACCTCAGAGTTTGACGACATGGCTTTTCTGGAGTCAATTCAACAGTTTCTTCTTAACGATGATTTCCAGACCTTAGCGAGTATTCCAGAGTTTAATTCCAGTGAGGAATCGAGCTTCTCTAGTAGTCCTCATTCAACTGATACCTGCAATCATTTACCTTCCAAATTAGTTAACGATCCTTATGAGATGAGCATTTGCAATGCTTTAGCTGATAATGAATGGAGCTTTTCGTGGAATCCGGTAAATCAATTTGATTCCACGGCGCTTGCTGCTAAAGAGGCGGAACTTTATGATGTGATCGCTAGTCCAGAACCAGAGGTTGTTTCTGAGCCTGAGGTCAGTATTCCAAAAGTTGCGGCGGCGCGTAAGAACAACTCAGATTGT…
101	ERF	IX	Jcr4S17456.30	JcERFIX-21	Jcr4S17456	7906	8721	1	0	Jcr4S17456.30	MWGENTSPPADDFFFLEPIQHYLLEDNFGNLMNSFDDSIHKPFKFDDLDDFTLDCSILGDYESNSQFDFTVPETTMAAPVESKSQDAATSSEEVEILINSFNNSSSTSSTLIFTDNTSNYSPFNIDDLDDFTIDSSIFGDSEFISQFDFPVAETTMPTVEQKSQEAAASFEEAVVTHNSNTPSKGWQYTGVRRRPWGKYAAEIRDPKKNGSRIWLGTYETPEDAALAYDRAAFKMRGSKAKLNFPHLIGSDDYEPIRVTNKRGSPERSSSS	ATGTGGGGGGAAAATACCTCACCGCCTGCTGATGATTTCTTTTTCTTGGAGCCGATTCAGCATTATCTCCTTGAAGATAATTTTGGAAATCTAATGAATTCCTTTGATGATTCGATCCATAAACCTTTCAAATTTGACGATCTCGACGATTTTACTCTTGATTGTAGTATTTTAGGTGATTATGAATCCAACAGCCAATTTGATTTTACAGTTCCAGAAACAACGATGGCCGCGCCTGTTGAATCAAAATCTCAGGATGCTGCCACTAGTTCTGAAGAGGTTGAAATCCTAATAAATTCCTTTAACAATTCGAGCTCTACTAGTTCTACTCTCATCTTCACCGATAACACCTCAAATTATTCACCTTTCAACATTGACGATCTCGATGATTTTACTATT…
102	ERF	X	Jcr4S00191.50	JcERFX-1	Jcr4S00191	26485	27887	2	1	Jcr4S00191.50	MMQGKRPFSCDVSSSNELGEEDHHISNTHQPYLDQAQSVNLESGRIEHRSSQPANDDHQGNIKRRHYRGVRQRPWGKWAAEIRDPKKAARVWLGTFDTAEAAAIAYDTAALKFKGSKAKLNFPERVQVPSGSHNNLGLLPTTNQNSLLLFPNNSNYNVISPPPPLPPLPPLPPPSVPLLPLTPQEAFPNLFQYAQLLCSNDDSYLQYAAASGLYDNNTSSNLWMSSLSSYSSSSSSSSSSIAPQQQREEDFLRFSPQMPASGFSSDYWSNNSYFLDQERDFDNISPKK	ATGATGCAAGGAAAGAGGCCATTTTCTTGTGATGTGTCATCATCAAATGAGCTTGGAGAGGAAGATCATCACATTTCAAATACCCATCAACCCTACCTTGATCAAGCCCAATCGGTTAATCTTGAGTCTGGTAGGATTGAACATCGATCTTCTCAACCTGCAAATGATGATCATCAAGGGAACATCAAAAGAAGACACTATAGAGGAGTAAGGCAAAGACCATGGGGAAAGTGGGCGGCCGAAATCCGAGACCCAAAAAAGGCTGCTCGTGTCTGGCTTGGAACCTTTGACACGGCAGAAGCTGCTGCTATTGCCTATGACACCGCTGCTTTGAAATTCAAAGGATCTAAAGCTAAGCTCAACTTTCCTGAACGTGTTCAAGTACCATCAGGATCTCAT…
103	ERF	X	Jcr4S00508.50	JcERFX-2	Jcr4S00508	20541	21785	2	1	Jcr4S00508.50	MCFLKVANPREKGINKNLDEWVYQPSMMLQQENKSNRNEQPFGSMLSGLSREREMSAMVSALTHVVTGEVPADIINNEGNCSGSSSDGANKRGREEEGGHTKLARSFGYVDRVNNTIDTSTIATTPIMPQTHIYEHNDTVREEPRRKYRGVRQRPWGKWAAEIRDPFKAARVWLGTFDTAEAAARAYDEAALRFRGSKAKLNFPENVRLLPSTSNPMTTQVAISNSQNTLFSVPQMVNNPRLDLGVGGYQRHQAVSLYDQMVLSSSNASSHFQTFSFAASSTTYSSSSPQSSVPLIIPAPRPADLRTATNQSSGGGGSADISEPALWSDCGHYTSSSG	ATGTGCTTTTTAAAGGTGGCGAATCCAAGAGAGAAAGGTATCAACAAGAATCTTGACGAATGGGTTTATCAACCATCGATGATGCTTCAACAAGAAAATAAGAGTAACAGAAATGAGCAGCCATTTGGATCAATGCTTTCTGGGTTGAGTAGAGAAAGAGAGATGTCAGCTATGGTTTCTGCTTTGACTCATGTTGTAACTGGAGAGGTGCCTGCCGATATTATTAACAATGAAGGGAATTGTTCGGGGAGTTCCAGTGATGGAGCTAATAAGAGAGGAAGAGAAGAGGAAGGAGGTCACACAAAGCTTGCTAGATCTTTTGGTTATGTTGACAGAGTTAATAACACAATAGACACTTCAACAATTGCAACAACCCCCATAATGCCACAAACACACATA…
104	ERF	X	Jcr4S01285.40	JcERFX-3	Jcr4S01285	13456	14013	1	0	Jcr4S01285.40	MNITTNINRLTSEEEDSIMVAALKQVISGDTSSIAPPNIIHILQGSDKCPVCNMDSVDCLGCNFFGSNQEEKDDSNKERMNKKKNKYRGVRQRPWGKWAAEIRDPWRAIRVWLGTFSTAEEAARAYDTAAIKFRGNKAKTNFPLSDYAQTSKNNEKMEKYKNAGESSSKVVAEEDDSIDSMMIED	ATGAACATCACCACAAATATAAATCGTTTAACCAGCGAAGAAGAAGACTCCATCATGGTTGCCGCTTTAAAACAGGTGATTTCTGGTGACACGTCATCAATAGCTCCGCCCAACATTATTCATATTCTCCAAGGTTCTGACAAATGCCCCGTCTGTAACATGGATTCAGTTGACTGTCTCGGCTGCAATTTCTTCGGGTCTAACCAAGAAGAGAAAGATGATAGTAACAAGGAAAGAATGAATAAGAAGAAGAACAAGTACAGGGGAGTCAGACAAAGGCCATGGGGGAAATGGGCGGCGGAGATACGTGACCCGTGGCGGGCAATTCGCGTGTGGCTCGGTACTTTCAGCACGGCAGAGGAGGCTGCACGAGCTTATGATACTGCTGCAATTAAGTTT…
105	ERF	X	Jcr4S01475.60	JcERFX-4	Jcr4S01475	45121	46572	2	1	Jcr4S01475.60	MTAMISALAQVMGSSTQNNPIHDIPLAIPQSNTQGLHPPQPQTVQDQGSTRRRHYRGVRQRPWGKWAAEIRDPNKAARVWLGTFDTAEAAALAYDEAALRFKGCKAKLNFPERVQGRTQSGFLTNNRQQQQQQQQQQTNNITPPRHPQSRQEVFQYPQYLPGGLMNYSMPPVGPYYNAGRNPVPSTTASSSSASSVPSHHEQEELLLRHSMQFGSPYSHSNPSTDHSSRE	ATGACTGCAATGATCTCTGCCCTTGCTCAAGTTATGGGAAGTAGTACCCAAAATAATCCAATTCATGATATTCCATTAGCTATACCACAATCCAATACACAAGGGCTTCATCCACCACAACCACAGACAGTTCAAGACCAAGGGAGCACACGGAGAAGACACTATAGAGGCGTGAGGCAAAGGCCGTGGGGCAAATGGGCTGCAGAGATAAGGGATCCAAATAAAGCAGCAAGAGTTTGGTTAGGTACTTTTGACACTGCAGAAGCTGCGGCACTCGCTTACGACGAAGCAGCTCTTAGGTTTAAAGGATGCAAAGCTAAGCTCAACTTTCCTGAAAGAGTGCAAGGCAGAACCCAGTCAGGTTTCTTGACTAATAATCGCCAACAACAACAACAACAA…
106	ERF	X	Jcr4S01806.10	JcERFX-5	Jcr4S01806	10982	12757	2	1	Jcr4S01806.10	MVGGRDDNQEEESHPRIVLPSQSLLLSNQPIIREGVITQSLPTTSTTMLPAAGYGSPREISAMVSALTHVVSGQRVGGGGDGGGAAAAGGSGRGDLGSSYGVGSFGSAITPGYTSTTDYSSTSSSLSTYSSGSGSSGFWIGQKRSREEEEGSATQLIESVPRVYRGFGDFRISQGDSSSSSATPVTEEAAASVIIPTPPTGTATATTTGTAPPTSSTETVSYEETGERRRRYRGVRQRPWGKWAAEIRDPHKAARVWLGTFDTAEAAARAYDEAALKFRGNRAKLNFPEHVRVLPPPPIQTVAVPYSHQPQPTPPQQTAPAPAPPYFHFQGDNIRDYWEYSQLLQSTGDFHVQPSSLLEQMFYNQQLASLQQNFSFSQLSSTSAPPFLAAASSSGSSST…	ATGGTCGGCGGCAGAGATGATAATCAAGAAGAAGAAAGCCACCCACGAATTGTTTTGCCTTCACAATCATTATTATTGAGTAATCAACCAATAATAAGGGAAGGGGTGATTACACAATCGTTACCAACAACGTCAACTACTATGTTGCCAGCTGCAGGTTATGGAAGTCCAAGGGAGATATCTGCAATGGTTTCTGCCCTAACTCATGTTGTATCGGGACAAAGAGTTGGCGGCGGTGGTGATGGTGGTGGTGCTGCTGCTGCTGGTGGCAGCGGCCGCGGTGATTTGGGATCATCATATGGAGTTGGTAGTTTTGGAAGTGCAATTACTCCAGGTTATACTTCTACTACTGATTATAGTTCAACGTCTTCTTCTTTGTCAACTTATTCGTCTGGTTCT…
107	ERF	X	Jcr4S03895.40	JcERFX-6	Jcr4S03895	14225	17841	3	2	Jcr4S03895.40	MWLHVQEKCNRSFLHFLLQILIVEDPFPGARVTYQVMLIKVDRRHGKRPLPSEASEEKEKEHQEFPSYPSSWSETDMSAMVSALSQVIATSTDDNPTSVQSTQVTAQQTLVKEELDQSQPTLDQENTRRRHYRGVRQRPWGKWAAEIRDPKKAARVWLGTFDTAEDAALAYDKAALKFKGTKAKLNFPERVQGKPEFSYFMTSSGDSSSALAPEQNPMAAAASAPSRHYLPPPPSFPQEAYPDLLQYAQILSSNDANFQYYTSNLFNQQSYAPPYYSSTFSSQQHQQQQEQQQQQQQQQNLTRFSPRFDSSSSSDYLEHGKDSSNPSE	ATGTGGCTTCATGTGCAAGAGAAATGCAACCGCTCTTTTCTTCATTTTCTATTGCAAATTCTTATCGTTGAAGATCCTTTTCCAGGTGCAAGAGTGACATACCAAGTGATGTTGATAAAGGTGGATCGAAGGCATGGAAAGAGGCCACTTCCATCGGAAGCATCAGAGGAGAAAGAGAAAGAACACCAAGAGTTCCCTTCTTATCCTTCTTCTTGGTCAGAAACAGACATGTCTGCCATGGTTTCAGCACTCTCTCAAGTCATCGCTACTTCCACTGACGATAATCCCACTTCGGTGCAATCAACTCAAGTTACTGCACAGCAAACGCTTGTCAAAGAGGAACTTGACCAGTCCCAACCTACTCTAGATCAAGAAAATACAAGAAGAAGACACTACAGA…
108	ERF	X	Jcr4S04462.40	JcERFX-7	Jcr4S04462	10481	10858	1	0	Jcr4S04462.40	MLSPATPPVAQRWLQISHRFVNSPPMVMVIVLVTPLPSVTGAVATTYHLVFTNASDLDTCSICKINGCLGCNFFPPNQEEKKGRRKRIKKNYRGVRQRPWGKWAAEIRDPRRATRVWLGTFNTAV	ATGTTGTCTCCGGCGACGCCACCAGTAGCACAACGGTGGCTTCAGATTTCTCACAGGTTCGTCAATTCCCCTCCAATGGTTATGGTTATAGTTCTAGTTACTCCTCTGCCGTCTGTTACTGGTGCAGTTGCTACCACCTACCACTTAGTTTTTACTAACGCATCAGATCTTGACACGTGTAGCATATGCAAAATCAACGGATGTTTAGGATGCAACTTCTTCCCGCCAAATCAAGAGGAAAAAAAGGGGAGAAGAAAAAGAATAAAGAAAAATTACAGAGGAGTAAGGCAGAGGCCGTGGGGAAAATGGGCGGCGGAGATAAGAGACCCACGGCGAGCGACAAGGGTGTGGCTAGGGACTTTTAACACGGCGGTGTAG
109	ERF	X	Jcr4S04462.60	JcERFX-8	Jcr4S04462	15443	16240	1	0	Jcr4S04462.60	MHKSSKRLKHTGPPPTEYLPPAMLLPRLTQDQELFIMVSALKNVVSGTTSSTSVATDLFHQFAAAASSSSPATAVASTAVTTTTDSLYNPIPPPSDLDTCNICKIKGCLGCNFFPPNQEEKKGTRKRVKKNYRGVRQRPWGKWAAEIRDPRRATRVWLGTFNTAEEAARAYDKAAIDFRGPRAKLNFPFPDNTASNLEGQSTPQEQQQKENGKRKELEVEMQVGKEYEFWEKIGEDEIQQWMNMMDFNGDSSDSTGTAATTTIAN	ATGCACAAGTCATCGAAACGACTCAAACACACCGGACCTCCGCCGACTGAATATTTACCTCCGGCAATGCTTTTGCCGCGGCTTACTCAAGATCAAGAACTCTTCATCATGGTTTCCGCTCTGAAAAATGTCGTCTCCGGCACCACCAGTAGCACCTCGGTGGCTACAGATTTGTTTCATCAATTCGCCGCCGCTGCCAGTAGTTCCTCCCCTGCTACTGCTGTTGCTTCTACAGCTGTTACTACCACCACGGATAGTTTATATAATCCAATACCGCCACCGTCGGATCTTGACACGTGTAACATATGCAAAATCAAAGGATGTTTAGGATGCAATTTTTTCCCGCCAAATCAAGAGGAAAAGAAAGGAACGAGAAAAAGAGTGAAGAAAAATTACAGG…
110	AP2	Double AP2	Jcr4S00070.110	JcAP2-1	Jcr4S00070	78724	81724	8	7	Jcr4S00070.110	MKSINNDDDNNSNTHWLGFSLSPLQMKMEIPSTSAASVCASASSISVPTAIPASFFQSNINYGSYCAVEGENGGLYSSLPVMPLKSDGSLCIMEALTRSQTQATLAATTSTPKLEDFFGGATMGTHHYETTDREAMPLSLDSMYYNHNEPNHQNCLSHLHQNPRHQNHQIQVQHYPYYNNNTNFRSYDMLIGEEPKENQVSDSNVQIQNLGDDTLSGMRNWVSRNYSNNQHAMEQQKMISCMGDSSGGESGAISAMAYGDLQSLSLSMSPGSQSSCVTGSQQISPAVTDCVAIETKKRGPDKAEQKQTVHRKSIDTFGQRTSQYRGVTRHRWTGRYEAHLWDNSCKKEGQSRKGRQGGYDMEEKAARAYDLAALKYWGPSTHINFQLENYQKELEEMKN…	ATGAAGTCCATAAACAATGATGATGATAACAATAGTAATACTCACTGGTTAGGTTTTTCCCTTTCGCCTCTTCAAATGAAAATGGAGATTCCTTCTACCTCTGCTGCTTCTGTTTGTGCTTCTGCTTCTTCTATTTCTGTGCCTACTGCAATTCCAGCAAGTTTCTTCCAATCAAACATCAATTATGGGAGTTACTGTGCTGTAGAAGGCGAAAATGGTGGGCTATACTCTTCTTTACCTGTTATGCCATTAAAGTCAGATGGGTCTCTTTGTATCATGGAAGCTCTTACCAGGTCACAGACTCAAGCAACATTGGCGGCAACAACCTCAACTCCAAAACTGGAAGACTTCTTTGGCGGTGCAACAATGGGCACCCATCATTATGAAACTACTGATAGA…
111	AP2	Double AP2	Jcr4S00084.150	JcAP2-2	Jcr4S00084	81994	84102	5	4	Jcr4S00084.150	MEMASGNSEAGKRNALCLVESEGIETKCVKRRRRDVSVAALSSNDQEKGNQNIQTSSTATATTVKRSSRFRGVSRHRWTGRYEAHLWDKGSWNATQRKKGKQGAYDEEESAARAYDLAALKYWGRSTFTNFPVSDYEKEIEIMKNVTKEEYLASLRRRSSGFSRGVSKYRGVARHHHNGRWEARIGRVFGNKYLYLGTYSTQEEAAHAYDIAAIEYRGINAVTNFDLSTYIRWLRPGAHSSANAIVQEPKSTIDSLTIPTFSNHINPTDKIIQQQLPLFQSNNSPYSMEELNGTFKESDIFKTNTPITISPCTVSSAPSSSSSSPTALSLLLKSSMFKELVEKNLNSAADFDDNEEKVFSENREIIYNGTSQIPYMYPSNGDALPGLESQEENTLPLYN…	ATGGAAATGGCAAGTGGAAATTCAGAGGCAGGAAAACGCAATGCACTGTGTTTGGTAGAAAGTGAAGGAATAGAAACAAAGTGTGTTAAGAGACGGAGAAGAGATGTTTCAGTAGCTGCTTTGAGCTCGAATGATCAAGAAAAAGGTAACCAAAATATTCAAACTTCTAGTACTGCAACTGCTACGACTGTGAAGAGAAGTTCAAGATTTCGTGGAGTTAGTAGACACAGATGGACTGGACGATATGAAGCTCATTTATGGGATAAAGGTTCTTGGAATGCAACACAGAGAAAGAAGGGAAAACAAGGAGCTTATGATGAAGAAGAATCTGCTGCTAGAGCATATGATTTAGCAGCTCTCAAGTACTGGGGAAGATCAACTTTTACAAATTTTCCGGTA…
112	AP2	Double AP2	Jcr4S00199.90	JcAP2-3	Jcr4S00199	65053	68201	8	7	Jcr4S00199.90	MSNWLGFSLSPHLRIDEGFGREEQAAAFSSHHDISGMPLHSDGSLCVVDPFRRSSNGTQDWRYENTLDATSASEEGPKLEDFLGCYSNSPSDETKVYCQEDQIPTQNHINRINVNVAPAFTTTNNGDIDTSSGENLTNASSLVQSYNHHYNDNPQTLIPNDNLQHCDPNPSLSHNNSIYHVPFESNGTCVSGFKSWLKQNPFSSDKSSNEVNNCNFQPLSLTMSPSSQNGLVAVSPLQVIDNRQRPTTVGKSLVREPVPRKSIDTFGQRTSQYRGVTRHRWTGRYEAHLWDNSCRKEGQTRKGRQGGYDKEEKAARAYDLAALKYWGPTTHINFPLSTYEKELEEMKHMTRQEFVANLRRKSSGFSRGASVYRGVTRHHQHGRWQARIGRVAGNKDLYL…	ATGAGTAACTGGTTGGGGTTTTCTTTGAGTCCACACTTGCGAATCGATGAAGGGTTTGGTAGAGAAGAACAAGCTGCTGCTTTCTCTTCTCATCATGATATTTCTGGTATGCCTTTACATTCTGATGGCTCTCTTTGTGTTGTTGATCCCTTTAGACGCAGCTCTAATGGCACTCAAGATTGGAGATACGAGAACACCTTGGACGCAACTAGTGCAAGTGAAGAAGGTCCAAAGCTTGAAGATTTTTTAGGTTGTTACTCAAACTCTCCTTCTGATGAAACCAAAGTTTATTGCCAAGAAGACCAAATCCCAACCCAAAACCATATTAATAGAATCAATGTTAACGTAGCACCAGCCTTCACCACTACTAATAATGGAGATATAGACACTAGTAGTGGA…
113	AP2	Double AP2	Jcr4S00224.30	JcAP2-4	Jcr4S00224	25377	28772	11	10	Jcr4S00224.30	MLDLNLNVDLAESTQNSDSVALMNKYQYQQYHDPEGSGTSNSSVVNADASSNDDSCSTRAYTGDASNSSINNSCVYTFNFDILKVGVGGNCGRGNEDENENDAVVTKEFFPVCGNGKGVGGDYANSLGQAGQGSSRNWIDLSFEKQQDIGDREVRVIQQPPPQQVKKSRRGPRSRSSQYRGVTFYRRTGRWESHIWDCGKQVYLGGFDTAHAAARAYDRAAIRFRGVDADINFSLSDYEEDLKQMKNLTKEEFVHILRRQSTGFSRGSSKYRGVTLHKCGRWEARMGQFLGKKYIYLGLFDSEVEAARAYDKAAIKCNGREAVTNFEPSAYEGEMVSEAINEGSEHNLDLNLGISPALGNGPKENEGHLQFHFGPFDMDSKSSRSIRFQNVVFVSMLLD…	ATGTTGGATCTTAATTTGAATGTGGACTTGGCCGAGTCGACTCAAAACTCAGACTCGGTGGCTTTGATGAATAAGTATCAGTACCAGCAGTACCATGACCCGGAAGGATCGGGGACGTCAAATTCATCAGTCGTCAATGCGGACGCGTCCAGCAACGATGATTCGTGTTCTACACGCGCCTACACTGGTGATGCTAGTAATAGCAGTATTAATAATAGTTGTGTCTACACCTTCAACTTCGATATATTGAAAGTAGGTGTTGGCGGTAACTGTGGTAGAGGAAATGAGGACGAAAACGAAAACGACGCCGTTGTGACCAAGGAGTTTTTCCCTGTGTGTGGTAATGGGAAAGGAGTGGGTGGAGATTACGCGAATTCTCTTGGGCAAGCTGGGCAAGGT…
114	AP2	Double AP2	Jcr4S00270.20	JcAP2-5	Jcr4S00270	11218	13541	10	9	Jcr4S00270.20	MLDLNLDIISTDSSSCDISKNNKNMEVTETSNKTVQMEEDSTNSSSIIINTVPEDENSSNNYTAFIFDILKKEKVDDNKNLIDFTTHQLFPEKSGLELDLQPGLSMVRPQWLKLSQMEPSGEAELRIVQQKQQQMRKSRRGPRSRSSQYRGVTFYRRTGRWESHIWDCGKQVYLGGFDTAFSAARAYDRAAIKFRGVDADINFNLSDYEEDIKQMKNLSKEEFIHILRRQSTGFARGSSRYRGVTRHKCGRWEARMGQFHGKKYNYLGLFDSEAEAARAYDMAAIKCNGREAVTNFEPSVYDGEPIFDLSSEGNGHNLDLSLGTSAPTNNNNVRDCNFLCTDHKLPNKDRLKGRSTASCTPKGSASLSMPSKFLPTLSSLLPSNQERVTEKSIVEAKTS…	ATGTTGGATCTCAATCTTGATATCATCTCTACTGACTCATCTTCTTGTGATATTAGCAAGAACAACAAGAATATGGAAGTAACAGAGACAAGCAATAAGACTGTTCAAATGGAGGAAGATTCTACAAACTCTTCCTCCATTATTATTAACACAGTACCAGAAGATGAGAACTCTTCCAATAATTACACTGCATTCATTTTCGATATCTTGAAAAAGGAAAAAGTAGATGATAATAAAAATCTAATTGATTTCACTACGCATCAGCTTTTTCCAGAGAAAAGTGGGTTGGAATTAGATTTGCAGCCTGGATTGTCAATGGTAAGGCCTCAGTGGCTTAAATTGTCGCAGATGGAGCCCAGTGGAGAAGCAGAGCTGAGAATTGTGCAGCAAAAACAGCAG…
115	AP2	Double AP2	Jcr4S00364.80	JcAP2-6	Jcr4S00364	36160	40192	9	8	Jcr4S00364.80	MAPATNWLSFSLSPMEMLRSSESQFMSYEGSSTASPHYLIDNFYANGWGNSKEAQVATTMAETSILTSFIDPETQHHHAPKLEDFLGDSSSIVRYSDNSQTETQDSTLTHIYDQGPAAYFNEQQDLKVIAGIQAFSTNSGSEVDDSASMARTQLGGGEFVGHSIESSGNELGFSSCTGANNALSLAVNNNNNQSSAEKSIVPVESDCPKKIADTFGQRTSIYRGVTRHRWTGRYEAHLWDNSCRREGQARKGRQGGYDKEEKAARAYDLAAMKYWGPTATTNFPVSNYTKELEEMKYVSKQEFIASLRRKSSGFSRGASIYRGVTRHHQQGRWQARIGRVAGNKDLYLGTFATEEEAAEAYDIAAIKFRGMNAVTNFEMSRYDVEAIMKSALPIGSSNS…	ATGGCACCAGCTACTAACTGGCTTTCCTTTTCACTATCTCCAATGGAAATGTTGAGGTCATCTGAATCTCAGTTCATGTCTTATGAAGGCTCTTCTACTGCTTCTCCTCACTATTTGATCGATAACTTCTATGCTAACGGCTGGGGAAACTCGAAGGAAGCACAAGTAGCAACAACAATGGCGGAGACTTCCATTCTCACAAGCTTTATAGACCCAGAAACCCAACACCATCATGCGCCTAAACTTGAGGACTTTCTTGGCGATTCATCATCCATAGTTCGCTACTCAGATAATAGCCAAACAGAGACTCAGGACTCAACTTTGACTCACATCTATGATCAGGGCCCTGCTGCTTACTTCAATGAGCAACAAGATCTTAAAGTGATTGCTGGGATTCAA…
116	AP2	Double AP2	Jcr4S00717.90	JcAP2-7	Jcr4S00717	33627	36395	11	10	Jcr4S00717.90	MLDLNLSVVSANSTSGSLEMAGETGGATNKKKNILEVSSNQMESSGSFNSSSIVNAGDEDSCSNGEPCGYTFSILTNDQAKVFDDDDDDCARGRTIQFFPVDGPSSDSMKRQWLDLGGRDMVAQVQQRPPVKKSRRGPRSRSSQYRGVTFYRRTGRWESHIWDCGKQVYLGGFDTAHAAARAYDRAAIKFRGVDADINFSVSDYEEDIMQMSNFTKEEFVHILRRQSTGFSRGSSKYRGVTLHKYIYLGLFDSEIEAARAYDKAAIKCNGREAVTNFEPSTYEGQIISEANNGDGNQNLDLNLGIAPPDISESQKINREMDTFHFQSSWDGRYELPYDPPMAPEPPALWGGLDTNFFPICKVFAHALEVIVERAIDKRMEVDSLPNWTWQSQGPYGGAN…	ATGTTGGATCTTAACCTTTCTGTGGTTTCTGCTAATTCCACCTCTGGTTCTTTGGAGATGGCGGGAGAGACCGGTGGGGCTACTAACAAAAAGAAAAACATTCTAGAAGTTTCCTCTAACCAAATGGAAAGTTCTGGTAGCTTCAATTCCTCTTCCATCGTCAATGCCGGAGACGAGGACTCCTGCTCTAATGGCGAACCTTGCGGCTACACTTTCAGCATCTTAACTAATGACCAGGCGAAAGTATTTGACGACGATGATGATGATTGCGCCCGTGGCCGGACTATACAGTTCTTTCCGGTGGACGGCCCGTCGTCGGATTCCATGAAGAGGCAGTGGTTGGATCTTGGGGGTAGGGATATGGTGGCGCAGGTGCAACAGAGGCCACCGGTCAAGAAG…
117	AP2	Double AP2	Jcr4S00938.40	JcAP2-8	Jcr4S00938	15796	18306	7	6	Jcr4S00938.40	MAKISQQSRRNTANSTNTNPTSTSTKPKRTRKTVPRDSPPQRSSVYRGVTRHRWTGRYEAHLWDKNCWNESQNKKGRQGAYDDEEAAAHAYDLAALKYWGQETILNFPRLKEMEGQSKEEYIGSLRRKSSGFSRGVSKYRGVARHHHNGRWEARIGRVFGNKYLYLGTYATQEEAATAYDMAAIEYRGLNAVTNFDLSRYIKWLRPNSSQQSPNSAADANLIPNPTQELGLSFTSHQQSSNSTETTVPPPWPNGRTGGSASSALGLLLQSSKFKEMLERTSAGDCPLTPPESEPRTPPSRSFPDDIQTYFECEDSGSFAISDDDIIFGDLNTFASPIFDQCCEFVG	ATGGCGAAGATCTCACAGCAAAGCCGAAGAAACACTGCAAATTCTACTAACACAAATCCTACATCAACATCAACTAAGCCTAAACGGACAAGAAAAACTGTGCCTAGAGACTCTCCTCCGCAGCGTAGCTCCGTTTACCGTGGAGTTACAAGACACCGGTGGACGGGACGGTATGAGGCTCATTTGTGGGATAAGAATTGCTGGAATGAATCGCAGAATAAGAAAGGAAGACAAGGTGCATATGATGATGAAGAAGCCGCAGCACATGCTTATGACTTGGCAGCATTGAAGTACTGGGGACAGGAGACCATCCTTAATTTCCCAAGACTCAAAGAGATGGAAGGTCAGTCAAAGGAAGAGTACATTGGATCCCTAAGAAGGAAGAGCAGTGGATTTTCC…
118	AP2	Double AP2	Jcr4S01061.10	JcAP2-9	Jcr4S01061	7454	10652	9	8	Jcr4S01061.10	MEVASSDPQHHHNQYHHEPEAPSVAAVSVSSSVPTSFYLSTSHFNTPGICYGVGESVGFHSPLSVMPLKSDGSLCIMEALTRSQSEGIVSSSSPKLEDFLGGATMENHQYSSHGRETMALSLDSMYYHQNTQPETNRQHSLDLHEPYRHQETHFSVQSHPYYNGIACHGMYQPPLEEQTKDTHLSDCDSQIPTMADDGMPCLKNWVARHYSTHNALEQQISNSLVDEGGASGSVSALGCGDLQSLSLSMSPGSQSSCVTAPRQISPTSTECLAMETKKRGPSKVGHKQPVHRKSIDTFGQRTSQYRGVTSCKKEGQTRKGRQVYLGGYDMEEKAARAYDLAALKYWGPSTHINFPLENYHEELEEMKNMSRQEYVAHLRRKSSGFSRGASMYRGVTRHH…	ATGGAGGTTGCTTCTTCTGACCCCCAACATCATCATAACCAGTACCATCATGAACCCGAAGCTCCTTCTGTTGCAGCTGTTTCTGTTTCCAGTTCTGTTCCAACAAGCTTCTATTTGTCTACTTCTCACTTCAACACTCCTGGAATCTGTTATGGAGTTGGAGAAAGCGTTGGCTTTCACTCTCCTTTGTCTGTTATGCCACTTAAGTCTGATGGGTCTCTCTGTATTATGGAAGCTCTAACTAGATCACAATCTGAAGGGATAGTATCAAGTTCCTCACCGAAGCTAGAAGACTTTCTAGGTGGTGCAACTATGGAAAACCATCAATATAGTAGCCACGGAAGGGAAACAATGGCTTTAAGCTTAGACAGTATGTATTATCATCAGAACACGCAACCA…
119	AP2	Double AP2	Jcr4S01265.30	JcAP2-10	Jcr4S01265	27462	29808	7	6	Jcr4S01265.30	MGKLSSQQNQKSVGNTNITINNNNNGVMKAKRTRRSVPRDSPPQRSSIYRGVTRHRWTGRYEAHLWDKNCWNESQNKKGRQGAYDDEEAAAHAYDLAALKYWGHETILNFPLSTYETELKEMEGQSREEYIGSLRRKSSGFSRGVSKYRGVARHHHNGRWEARIGRVFGNKYLYLGTYATQEEAATAYDMAAIEYRGLNAVTNFDLSRYIKWLKPNQNDINNNNYDPKQPNPNLGTNSSTPNPNNQEFGLSFLNQQTNQLPPASETTMAVIEPRPANATSALGLLLQSSKFKEMMEMTSMTDYPSTPADNQIEPQQCRFPDDIQTYFDCQDQNTYGEGDDMIFDDLNSFVPQMFQCDF	ATGGGGAAATTATCATCGCAGCAAAATCAGAAAAGTGTGGGAAATACTAACATTACGATAAATAATAATAACAATGGAGTTATGAAGGCGAAACGTACTAGAAGAAGTGTACCGAGAGACTCTCCTCCTCAACGTAGCTCCATTTATCGAGGGGTTACTAGGCATCGGTGGACTGGTCGATACGAAGCTCATTTGTGGGATAAAAACTGTTGGAACGAATCGCAAAATAAGAAAGGACGACAAGGTGCCTATGATGATGAAGAAGCAGCTGCACATGCTTATGATTTAGCAGCACTCAAATATTGGGGTCATGAAACAATTCTCAATTTTCCGCTATCAACATATGAAACCGAGCTTAAAGAAATGGAGGGTCAGTCCAGAGAAGAATACATTGGATCA…
120	AP2	Double AP2	Jcr4S03855.10	JcAP2-11	Jcr4S03855	6160	11049	6	5	Jcr4S03855.10	MKRSSASSCSSSSSSSSSPSSSSSSACSASSSCLDSVSPPNHHQLRSEKSKSKRIRKIQTKQDKCQTTATTTSPSGGGRRSSIYRGVTRHRWTGRFEAHLWDKSSWNNIQNKKGRQGAYDNEEAAAHTYDLAALKYWGQDTTLNFPIETYSKELEEMQKMSKEEYLASLRRRSSGFSRGVSKYRGVARHHHNGRWEARIGRVFGNKYLYLGTYNTQEEAAAAYDMAAIEYRGANAVTNFDVSHYIDRLKKKGIPLDKILPETLSKGSKESEEIERTSPLPLPSPPSPSITPLHEEIVSPQLLETECPQHPPCMDTCTMIVMDPIEEHELTWSFCLDSGLVPLPVPDLPLANGCELPDLLDDTGFEDNIDLIFDACCFGNDANPADENGKERLSSASTSP…	ATGAAGAGGTCTTCTGCTTCATCTTGCTCTTCTTCTTCTTCTTCTTCTTCTTCTCCATCCTCTTCTTCGTCTTCTGCTTGTTCTGCTTCGTCTTCTTGCTTAGATTCAGTATCTCCTCCTAATCACCATCAATTACGATCAGAGAAATCAAAATCCAAACGCATTCGAAAAATTCAAACCAAGCAAGATAAATGTCAGACTACAGCTACTACCACCAGTCCAAGCGGCGGCGGTAGGAGAAGCTCCATTTACAGAGGAGTCACCCGGCATAGATGGACTGGAAGGTTTGAAGCTCATCTTTGGGATAAGAGTTCTTGGAATAACATTCAAAACAAGAAAGGAAGGCAAGGGGCTTACGACAATGAGGAAGCAGCTGCTCATACCTATGATCTTGCTGCT…
121	AP2	Double AP2	Jcr4S05417.20	JcAP2-12	Jcr4S05417	10909	13310	7	6	Jcr4S05417.20	MCITEGEAQATRCVKRRRRDAVDNQILQQQTDQTSATAAATVKRSSRFRGVSRHRWTGRYEAHLWDKLSWNVTQKKKGKQGAYDEEESAARAYDLAALKYWGTSTFTNFPISDYEKEIEIMQTVTKEEYLASLRRKSSGFSRGVSKYRGVARHHHNGRWEARIGRVFGNKYLYLGTYSTQEEAARAYDIAAIEYRGINAVTNFDLSTYIRWLKPGVAANEPETILEPSMFPSTDNYIPIEENKPSFFNITQFSSDCLNSPKRPEVFQNKISSSPYQKTSSPTALSLLLRSSIFRELVEKNSNVSGDENDGEEGKNQPQIGGDDEFSGIFYEGIGEIPTFAYSSDKDGLDLQERELQFVL	ATGTGCATAACAGAAGGCGAGGCACAAGCAACTCGTTGCGTAAAAAGAAGACGCAGAGATGCAGTTGACAATCAAATTCTGCAGCAACAAACTGATCAAACTTCTGCTACTGCTGCTGCTACTGTGAAAAGAAGTTCAAGGTTCCGGGGTGTCAGCAGACATCGATGGACAGGGAGATATGAAGCACACTTGTGGGATAAGCTCTCATGGAATGTAACGCAGAAGAAGAAAGGAAAACAAGGAGCTTATGATGAAGAAGAATCTGCAGCAAGAGCATATGATTTAGCTGCATTAAAATATTGGGGGACATCAACATTTACTAATTTTCCGATATCAGATTATGAGAAAGAGATTGAGATAATGCAAACCGTAACAAAAGAGGAATATTTGGCATCTTTG…
122	AP2	Double AP2	Jcr4S05484.20	JcAP2-13	Jcr4S05484	14089	18883	10	9	Jcr4S05484.20	MGSMNSNNWLSFPLSPTHSSLPPHLHTSHPQQFSLGLVTETMDNPFQNQEWSLVNTQGSSEVPKVADFLGVSKSENQSDLVAFNGLQANDSDYMFQSNSLLPVHNAVVAASTNYEFQENANNLQSLTLSMGSASGKASTCETSGDNSTNTVEATAPRRTLDTFGQRTSIYRGVTRHRWTGRYEAHLWDNSCRREGQSRKGRQVYLGGYDKEEKAARAYDLAALKYWGTSTTTNFPISNYEKELEEMKHMTRQEKSSGFSRGASMYRGVTRHHQHGRWQARIGRVAGNKDLYLGTFSTEEEAAEAYDIAAIKFRGLNAVTNFDMSRYDVKSILESNTLPIGGGAAKRLKEAQAIESSRKREEMIALGSSFQYGSSSSNNRLQAYSLMQSPFEQPQPLLTL…	ATGGGCTCCATGAATTCAAACAACTGGCTGTCTTTTCCTCTTTCTCCCACTCATTCTTCTTTGCCTCCCCACTTACATACTTCTCACCCTCAACAGTTTTCTTTAGGGTTAGTCACTGAAACTATGGATAACCCATTTCAAAACCAAGAATGGAGTCTTGTCAACACCCAAGGCAGCAGTGAAGTTCCAAAAGTTGCAGACTTTCTTGGTGTGAGCAAATCCGAGAATCAATCAGATCTTGTTGCCTTCAATGGACTTCAGGCTAATGATTCTGATTACATGTTTCAAAGCAATAGTCTTTTGCCAGTGCATAACGCTGTGGTAGCTGCCTCTACCAACTATGAGTTTCAAGAAAATGCCAACAATTTACAGTCATTAACATTATCTATGGGTAGTGCT…
123	AP2	Double AP2	Jcr4S06207.10	JcAP2-14	Jcr4S06207	11715	14659	7	6	Jcr4S06207.10	MNMDSSSHHQNWLGFSLSNQHHQHINPSHLCLFEAFTTTTTTSSADRGRAQSQARGEDVTATGTDLSIFTPTGPKLEDFLGSSTTAPPPPPPQPSLQSQFLAETAAAAAAAAPPPPSMTTDSETCEIYDSELKSIAACFLRGFSNSSSSSSSTTTTTTTNINQEINIITQNQPLLAQAAESAPRKTVDTFGQRTSIYRGVTRHRWTGRYEAHLWDNSCRREGQSRKGRQGGYDKEEKAARAYDLAALKYWGPTTTTNFPISNYQKEIEEMKHMTRQEFVASLRRHHQHGRWQARIGRVAGNKDLYLGTFSTQEEAAEAYDIAAIKFRGLNAVTNFDMSRYDVKSIANSNLPIGGISGKSKNSSDSTSESKSMDGCKSSADDRDHLSSASSVTFVSPTAN…	ATGAACATGGATTCTTCTTCTCACCACCAGAACTGGCTTGGTTTCTCTCTTTCTAATCAACATCACCAGCATATAAATCCCTCTCATCTCTGTCTTTTTGAAGCTTTTACCACCACCACCACCACTTCTTCTGCAGATAGAGGTAGAGCACAATCACAGGCACGAGGAGAAGATGTTACAGCAACAGGAACAGACCTATCAATATTTACTCCAACTGGACCAAAGCTCGAGGACTTTCTTGGCAGCTCCACCACTGCACCACCGCCACCGCCACCACAACCATCACTGCAGAGTCAGTTTCTTGCTGAAACAGCAGCAGCAGCAGCAGCAGCAGCACCACCACCACCATCTATGACTACTGACTCTGAAACGTGTGAAATATACGATTCTGAGCTTAAA…
124	AP2	Double AP2	Jcr4S07197.20	JcAP2-15	Jcr4S07197	7101	9209	5	4	Jcr4S07197.20	MEMASGNSEAGKRNALCLVESEGIETKCVKRRRRDVSVAALSSNDQEKGNQNIQTSSTATATTVKRSSRFRGVSRHRWTGRYEAHLWDKGSWNATQRKKGKQGAYDEEESAARAYDLAALKYWGRSTFTNFPVSDYEKEIEIMKNVTKEEYLASLRRRSSGFSRGVSKYRGVARHHHNGRWEARIGRVFGNKYLYLGTYSTQEEAAHAYDIAAIEYRGINAVTNFDLSTYIRWLRPGAHSSANAIVQEPKSTIDSLTIPTFSNHINPTDKIIQQQLPLFQSNNSPYSMEELNGTFKESDIFKTNTPITISPCTVSSAPSSSSSSPTALSLLLKSSMFKELVEKNLNSAADFDDNEEKVFSENREIIYNGTSQIPYMYPSNGDALPGLESQEENTLPLYN…	ATGGAAATGGCAAGTGGAAATTCAGAGGCAGGAAAACGCAATGCACTGTGTTTGGTAGAAAGTGAAGGAATAGAAACAAAGTGTGTTAAGAGACGGAGAAGAGATGTTTCAGTAGCTGCTTTGAGCTCGAATGATCAAGAAAAAGGTAACCAAAATATTCAAACTTCTAGTACTGCAACTGCTACGACTGTGAAGAGAAGTTCAAGATTTCGTGGAGTTAGTAGACACAGATGGACTGGACGATATGAAGCTCATTTATGGGATAAAGGTTCTTGGAATGCAACACAGAGAAAGAAGGGAAAACAAGGAGCTTATGATGAAGAAGAATCTGCTGCTAGAGCATATGATTTAGCAGCTCTCAAGTACTGGGGAAGATCAACTTTTACAAATTTTCCGGTA…
125	AP2	Double AP2	Jcr4S14849.10	JcAP2-16	Jcr4S14849	7409	9963	10	9	Jcr4S14849.10	MWDLNDSPDQRRDDESEGCSSQKTSLDGEDDNKGKRVGSVSNSSSSXSAVVIEDGSEEEDHASAERGRIKKRTSKIFGFSVPREDYMDTDAPVTRQFFPVEDQEMGATSAGSGGAGFPRAHWVGVKFCQSESSLASPKSVEMSQPLKKSRRGPRSRSSQYRGVTYYRRTGRWESHIWDCGKQVYLGGFDTAHAAARAYDRAAIKFRGVEADINFSIEDYEEDLKQMSNLTKEEFVHVLRRQSTGFPRGSSKYRGVTLHKCGRWEARMGQFLGKKYVYLGLFDTEIEAARAYDKAAIKCNGKEAVTNFDPSIYENELNSSESSGNVAADHNLDLSLGNSAGMDQHSPSMDWRNRGIRPPKLNLQRNGENDDRRREGYCETETMQLLSQTHIQSPANEPQR…	ATGTGGGACTTAAATGACTCGCCTGATCAGAGAAGAGATGATGAATCCGAGGGTTGTTCTTCGCAGAAAACCTCTTTAGATGGCGAAGATGATAATAAGGGTAAACGGGTCGGATCTGTTTCTAATTCTAGCTCTTCTGNTTCTGCTGTTGTTATTGAGGATGGATCCGAAGAAGAAGATCATGCTAGTGCTGAGAGAGGAAGAATCAAGAAGCGGACTAGTAAAATATTTGGGTTTTCTGTTCCTCGTGAAGACTACATGGACACTGACGCGCCTGTGACCCGCCAATTTTTTCCGGTTGAGGATCAAGAAATGGGGGCAACGTCTGCTGGCAGCGGTGGAGCTGGGTTTCCCCGCGCTCACTGGGTTGGAGTTAAGTTTTGTCAATCGGAATCATCA…
126	AP2	Double AP2	Jcr4S26551.10	JcAP2-17	Jcr4S26551	4216	6689	9	8	Jcr4S26551.10 /partial	MGSMNSNNWLSFPLSPTHSSLPPHLHTSHPQQFSLGLVTETMDNPFQNQEWSLVNTQGSSEVPKVADFLGVSKSENQSDLVAFNGLQANDSDYMFQSNSLLPVHNAVVAASTNYEFQENANNLQSLTLSMGSASGKASTCETSGDNSTNTVEATAPRRTLDTFGQRTSIYRGVTRHRWTGRYEAHLWDNSCRREGQSRKGRQVYLGGYDKEEKAARAYDLAALKYWGTSTTTNFPISNYEKELEEMKHMTRQEKSSGFSRGASMYRGVTRHHQHGRWQARIGRVAGNKDLYLGTFSTEEEAAEAYDIAAIKFRGLNAVTNFDMSRYDVKSILESNTLPIGGGAAKRLKEAQAIESSRKREEMIALGSSFQYGSSSSNNRLQAYSLMQSPFEQPQPLLTL…	ATGGGCTCCATGAATTCAAACAACTGGCTGTCTTTTCCTCTTTCTCCCACTCATTCTTCTTTGCCTCCCCACTTACATACTTCTCACCCTCAACAGTTTTCTTTAGGGTTAGTCACTGAAACTATGGATAACCCATTTCAAAACCAAGAATGGAGTCTTGTCAACACCCAAGGCAGCAGTGAAGTTCCAAAAGTTGCAGACTTTCTTGGTGTGAGCAAATCCGAGAATCAATCAGATCTTGTTGCCTTCAATGGACTTCAGGCTAATGATTCTGATTACATGTTTCAAAGCAATAGTCTTTTGCCAGTGCATAACGCTGTGGTAGCTGCCTCTACCAACTATGAGTTTCAAGAAAATGCCAACAATTTACAGTCATTAACATTATCTATGGGTAGTGCT…
127	AP2	Single AP2	Jcr4S00613.10	JcAP2-18	Jcr4S00613	2864	5644	8	7	Jcr4S00613.10	MASSSSDPCLKPELGGGGGSSGGSAGGGGESSEAVIANDQLLLYRGLKKPKKERGCTAKERISKMPPCTAGKRSSIYRGVTRHRWTGRYEAHLWDKSTWNQNQNKKGKQVYLGAYDDEEAAARAYDLAALKYWGPGTLINFPVTDYTRDLEEMQNVSREEYLASLRRKSSGFSRGISKYRGLSRHGSYCIIAFKASSHAGRAADDPASESDYVGSLCFERKIDLTSYIKWWGSNKTRQAESISKSSEEAKHGYAEDVGGELKTSEWAVQPTEPYQMPCLGMPIDGKKHKGSSFSALSILSKSAAYKSLQERASKKQENRTDNDENKNKNTNKMDYGKAVEKSTSHDNSNERLGVALGMIGGLSLQRNVYQLTPFLPAPLLSNYNTIDPLVDPIHWTSLV…	ATGGCTTCCTCTTCTTCGGATCCTTGCTTGAAACCAGAACTGGGCGGCGGCGGTGGCAGTAGTGGTGGTAGCGCCGGTGGAGGTGGAGAGAGTTCAGAGGCAGTAATAGCTAATGATCAGCTGTTACTGTATAGAGGGCTAAAGAAACCTAAGAAAGAGAGAGGCTGCACTGCTAAAGAACGTATAAGCAAGATGCCTCCTTGCACAGCCGGTAAACGCAGCTCTATTTACCGTGGTGTCACTAGACATAGATGGACTGGTCGATATGAAGCTCACCTCTGGGACAAAAGTACATGGAACCAGAATCAGAACAAGAAGGGAAAGCAAGTATACTTGGGGGCATATGATGATGAGGAGGCTGCAGCCAGAGCATATGATCTTGCTGCCTTAAAATATTGG…
128	AP2	Single AP2	Jcr4S01284.80	JcAP2-19	Jcr4S01284	17719	21695	6	5	Jcr4S01284.80	MNNWLGFSLSPQQLPSQSDHHQDHSQTTASRLGFHSDEISGTGVSGECFDLTSDSTVPSLNLPAPFGILEAFRNNQSQDWNMKGLSMNPETAYKTNSDLCMLIGSSCNTQNLDQNQQPKLENFLGGHSFANHENKLATMYNTTGDYMFQDCSLQAANDTTCNGEENNSLNTANNNSNSSIGLSMIKTWLRNQPAPTQQQQQETKNINGGGAQSLSLSMSTGEGNINNNSGGGDHSSSSDNNKQQKTTSSGLDSQTGAIESVPRKSIDTFGQRTSIYRGVTRHRWTGRYEAHLWDNSCRREGQNSKGKARKSSGFSRGASIYRGVTRHHQHGRWQARIGRVAGNKDLYLGTFSTQEEAAEAYDIAAIKFRGLNAVTNFDMSRYDVNSILESSTLPIGGAA…	ATGAACAACTGGTTAGGTTTCTCTCTTTCTCCTCAACAGCTCCCATCACAATCAGATCATCATCAAGATCACTCTCAAACCACGGCTTCTCGCTTAGGTTTCCACTCAGATGAAATCTCCGGTACCGGTGTCTCCGGAGAATGCTTCGATCTCACTTCAGACTCAACTGTTCCTTCTCTCAACCTTCCTGCTCCTTTTGGTATACTTGAAGCTTTCAGAAACAACCAATCTCAAGATTGGAATATGAAGGGTTTAAGCATGAACCCAGAAACTGCCTACAAAACAAACTCAGACTTGTGTATGCTTATAGGTTCTTCATGCAATACTCAAAATCTTGATCAAAACCAGCAACCCAAGCTTGAAAACTTTCTTGGCGGCCATTCATTTGCCAATCATGAA…
129	RAV		Jcr4S00318.20	JcRAV-1	Jcr4S00318	5100	6059	1	0	Jcr4S00318.20	MELEWHSDSSMSSNSNIISNNQRMKENYSSTSTWSKYRGVIWLKSGKWGARIAFRYKAYWLGTYDTEEEAGMAYDRACIKLQRSDAPLNFPMHMYSVQETKFQSHYSNEDILDMIKDKSYLSKFEKYIADQSLVSELGGMAQRGLSYRMLFRKELTQTDATHIKGFHIPKEYAIEYFPPLSAGDENENKSIELTFYDKHSCPWTFRYSYWKSTQTFVFTKGWRHFLKMNNLKPKDCVFFYRCEHQKESQGRGFYYMIDAQRVSVDGDSGNVDKARQLMRKKLNNEELVEDMEEEKTSNNNGVMLFGVQIGKTSEYKQFI	ATGGAGTTGGAGTGGCATTCAGATTCAAGCATGAGTTCAAACTCAAACATTATCAGCAACAATCAGCGGATGAAAGAAAATTACAGCAGCACAAGTACTTGGTCGAAATATAGAGGAGTGATTTGGCTCAAAAGTGGGAAATGGGGTGCACGAATCGCCTTCAGGTACAAGGCTTACTGGCTTGGAACATATGATACAGAAGAAGAAGCAGGAATGGCTTATGATAGGGCATGCATCAAACTTCAAAGAAGCGATGCGCCTCTTAACTTCCCTATGCATATGTACTCAGTGCAAGAGACCAAGTTTCAGAGTCATTACTCAAATGAGGATATTCTTGATATGATCAAGGATAAGAGCTACTTATCCAAATTTGAAAAATATATTGCAGATCAATCTTTG…
130	RAV		Jcr4S00711.80	JcRAV-2	Jcr4S00711	44998	46030	2	1	Jcr4S00711.80	MIGKETMSVISSGETSLTEEVSDSISSTYPLQASKRARHGGNVCTSKFRGVVPHQNGNWGCQIYANHQRIWLGTFKSEKDAAMAYDIINMIKDGTYQSKFADFIRTCLQSVETELKLMPVKTQSTRRLTCKQLFQKELTPSDVGKLNRLVIPKKFAMKFFSRISESSEGNVVGANKLDDGQLSFYDKNMKLWKFRYCYWRSSQSYVFTRGWNRFVKEKQLKANDTIVFCLCECWENSRVGQGYYMIDVNNVERSIGLMESSNQNDAMGMELQLHLGQSAVCDYVRGERLMEAKPRHDDTNRKSFRLFGTQII	ATGATTGGGAAGGAAACTATGAGCGTCATTTCAAGTGGTGAAACTTCTTTGACTGAAGAAGTTTCAGATTCAATCAGCAGCACGTACCCATTACAGGCAAGCAAACGTGCGAGGCATGGTGGCAATGTCTGCACTTCAAAATTCAGAGGTGTTGTACCACATCAAAATGGCAACTGGGGCTGCCAAATATATGCCAATCACCAACGTATTTGGCTCGGAACTTTCAAGTCTGAGAAGGATGCAGCGATGGCTTATGACATTATCAACATGATTAAGGACGGTACTTACCAGTCAAAATTTGCTGATTTCATAAGGACTTGCTTGCAAAGTGTTGAAACTGAGCTTAAGCTTATGCCAGTTAAGACACAAAGCACTAGAAGGTTGACATGCAAACAACTT…
131	RAV		Jcr4S03357.10	JcRAV-3	Jcr4S03357	1425	2507	1	0	Jcr4S03357.10	MDGSCIDESTTTDSISLTPPTKSSPESPLCRVGSGTSVILDSESGVEAESRKLPSSKYKGVVPQPNGRWGAQIYEKHQRVWLGTFNEEDEAAKAYDIAAQRFRGRDAIANFKLEANETEDDDIETAFLNSHSKAEIVDMLRKHTYNDELEQSKRNYRIDGQGKHKNHGGVNNVGLIASERVLKAREQLFEKAVTPSDVGKLNRLVIPKQHAEKHFPLQSGSNSTKGVLLNFEDITGKVWRFRYSYWNSSQSYVLTKGWSRFVKEKNLKAGDIVSFQRSTGPDKQLYIDWKVRTSGSNQVVCPMVQPVQMVRLFGVNIFKVAGNGNGGVEGVVGGCSGKRMREMDLLSLEYSKKQMVIGAL	ATGGATGGAAGTTGCATAGATGAGAGTACTACTACTGACTCCATTTCTCTAACGCCGCCAACAAAGTCCTCGCCGGAGTCTCCTCTCTGCCGTGTTGGAAGCGGCACAAGTGTGATTCTCGATTCTGAATCCGGCGTCGAAGCTGAGTCTCGTAAACTCCCTTCCTCTAAATACAAAGGCGTTGTTCCTCAACCGAACGGCCGCTGGGGAGCTCAGATTTACGAGAAGCATCAGCGTGTTTGGCTTGGTACTTTTAATGAAGAAGATGAAGCAGCCAAAGCTTATGACATCGCTGCACAGAGATTCCGCGGCCGCGATGCCATCGCTAATTTTAAGCTTGAAGCGAATGAAACTGAAGACGATGATATCGAAACGGCTTTCTTGAACTCTCATTCGAAA…
132	RAV		Jcr4S20061.20	JcRAV-4	Jcr4S20061	3912	4982	1	0	Jcr4S20061.20	MEDDASSSLLSNGKTNIVTFQISDSFDSNYPPFCASKRPRLEHNNNNNNAPKFKGVVQQQNGHWGAQIYANHQRIWLGTFKSEKEAAMAYDSAAIKLRSGDSCRNFPWNERNIQEPNFQIQFSAQVILNMIRDGSYQPNFADFLKTQSRRQGLAGTSSLENNSIQTYGDGQFSCIQLFQKELTPSDVGKLNRLVIPKKFAIKYFPYISGNVEEDAGIEDLELVFFDRLMKCWKFRYCYWKSSQSYVFTRGWNRFVKEKNLKEKDIVTFYACIGPNTVQEGQHFSLIDISYSNGQSCVADDGVSHIEEMQKDLELNLGQTIRNKFHKHEEKGENGFRELELKISSKSKGLRLFGVQIN	ATGGAAGACGATGCATCATCAAGCTTGCTTTCTAATGGCAAGACGAACATTGTAACTTTTCAAATTTCAGATTCATTTGATAGCAATTATCCTCCTTTTTGTGCAAGCAAACGTCCAAGACTAGAGCATAATAATAATAATAATAATGCACCAAAATTCAAAGGGGTGGTGCAACAACAAAATGGACATTGGGGTGCACAAATATATGCAAATCATCAAAGGATTTGGTTGGGGACATTTAAATCTGAGAAAGAAGCAGCAATGGCATATGATAGCGCAGCGATAAAGCTTCGCAGTGGAGATTCATGTAGAAATTTTCCTTGGAATGAAAGGAACATTCAAGAGCCTAACTTCCAAATCCAATTTAGTGCACAAGTGATTTTGAATATGATTAGAGAT…
133	Soloist		Jcr4S04081.20	Soloist	Jcr4S04081	11726	13040	4	3	Jcr4S04081.20	MQQYFFKQVLDVVLQPVKRRKRHRRKHVQNQEQCLMRGVYFKNMKWQAAIKVDKKQIHLGTVGSQEEAARLYDRAAFMCGREPNFELSEEEKQELRKFKWDEFLAITRSAINNKKHKRRNGASLPKKSEATLQNGDWDDKQGVNSFSASEDVEPDSSTS	ATGCAACAATATTTCTTTAAGCAAGTTCTTGATGTGGTTTTGCAACCTGTTAAGCGTCGAAAGCGACACAGGAGAAAGCACGTTCAGAACCAGGAGCAATGCCTAATGAGAGGTGTCTATTTCAAAAATATGAAATGGCAGGCAGCAATTAAAGTTGACAAGAAGCAAATCCACCTGGGAACTGTTGGTTCACAAGAAGAGGCTGCCCGTTTGTATGACAGGGCTGCGTTTATGTGTGGGAGAGAACCCAACTTTGAACTGTCTGAGGAGGAGAAGCAAGAACTTAGAAAATTTAAATGGGATGAATTTTTGGCAATTACTCGCAGTGCAATAAATAATAAAAAGCACAAGAGAAGAAATGGAGCCAGTTTGCCTAAGAAATCTGAAGCTACATTGCAG…
